# Supplementary material for: Structural basis of phosphatidylinositol 3-kinase C2α function
Source: PubMed Central journal article supplement (PMC8930771; doi:10.1038/s41594-022-00730-w), 2022-03-07

input- anti-GFP

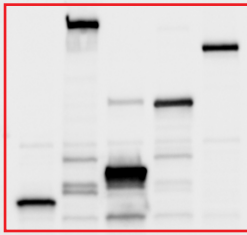

IP- anti-GFP

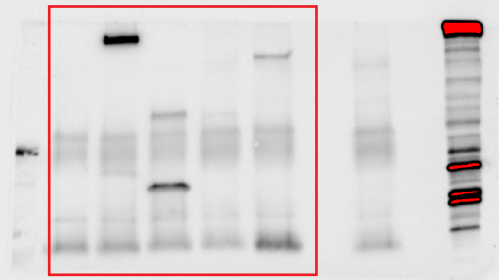

input TACC3

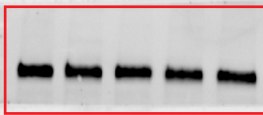

IP- TACC3

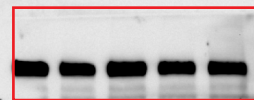

Supplement: 41594_2022_730_MOESM11_ESM.pdf [file 41594_2022_730_MOESM11_ESM.pdf]
