# Supplementary material for: Structural basis of phosphatidylinositol 3-kinase C2α function
Source: PubMed Central journal article supplement (PMC8930771; doi:10.1038/s41594-022-00730-w), 2022-03-07

extended data Fig. 1b left

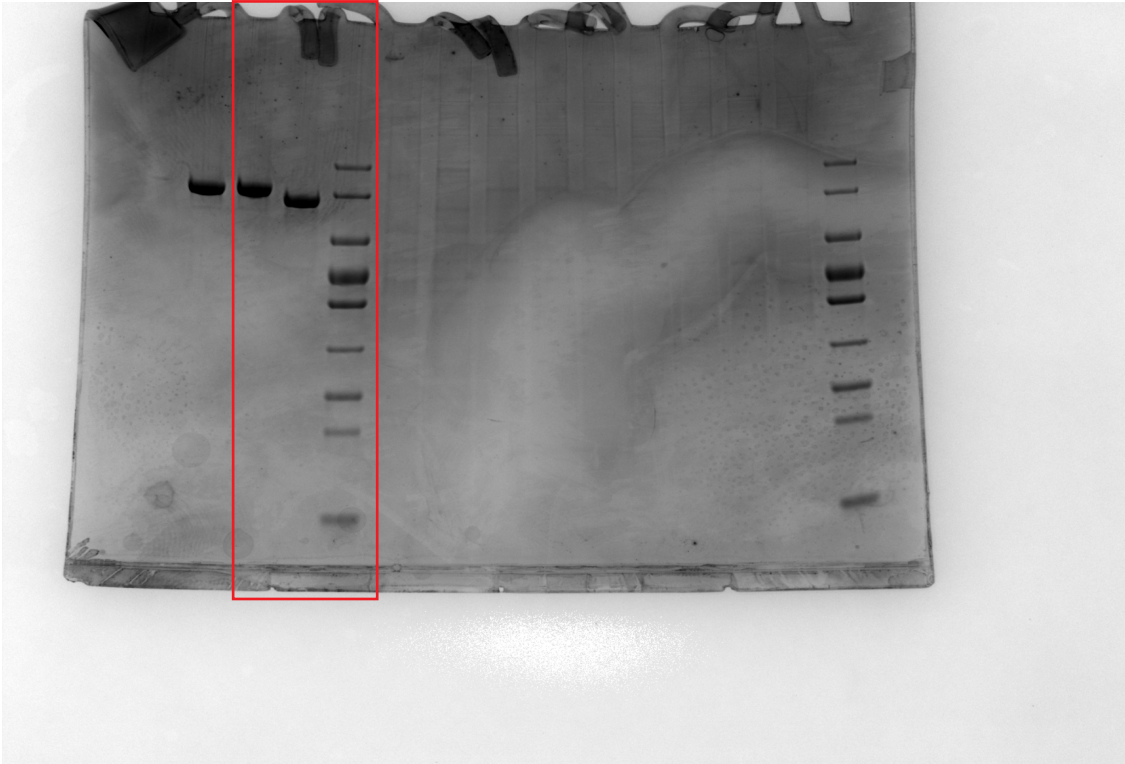

extended data Fig. 1b right

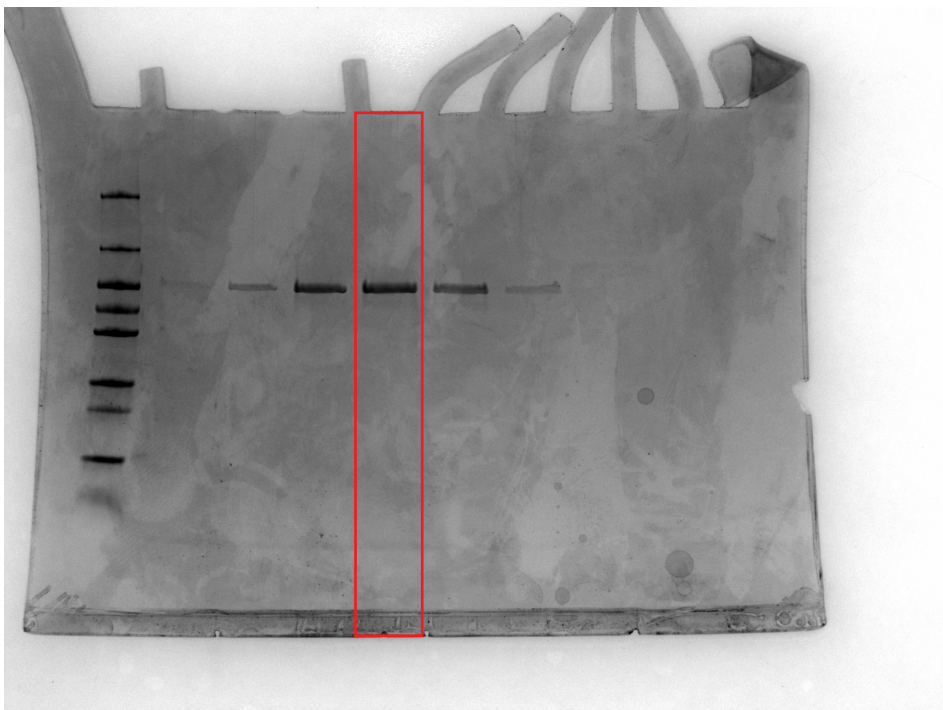

Supplement: 41594_2022_730_MOESM13_ESM.pdf [file 41594_2022_730_MOESM13_ESM.pdf]
