# Supplementary material for: Structural basis of phosphatidylinositol 3-kinase C2α function
Source: PubMed Central journal article supplement (PMC8930771; doi:10.1038/s41594-022-00730-w), 2022-03-07

Extend datat Fig. 6d left

Extend datat Fig. 6d right

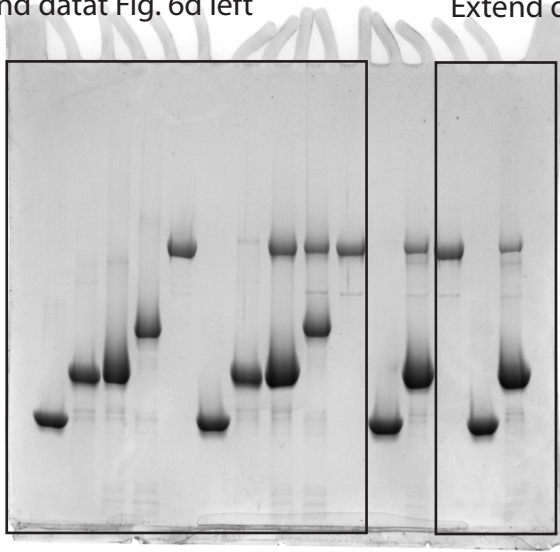

marker

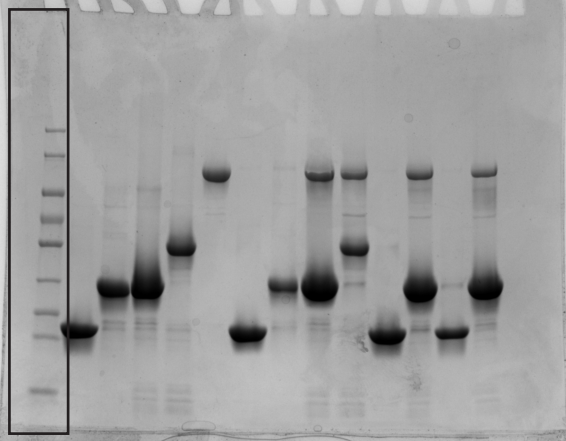

Supplement: 41594_2022_730_MOESM17_ESM.pdf [file 41594_2022_730_MOESM17_ESM.pdf]
