# Supplementary material for: Structural basis of phosphatidylinositol 3-kinase C2α function
Source: Springer Nature journal article supplement (doi:10.1038/s41594-022-00730-w), 2022-03-01
Supplement: MOESM1 [file 41594_2022_730_MOESM1_ESM.pdf]

**Supplementary information**

---

**Structural basis of phosphatidylinositol  
3-kinase C2 $\alpha$  function**

---

In the format provided by the  
authors and unedited

## **Inventory of supplementary items contained in this file**

### **Supplementary Table**

**Supplementary Table 1: Oligonucleotides**

### **Supplementary Data**

PDB validation report

## Supplementary table 1. Oligonucleotides

| Oligonucleotides                                                               | SOURCE              | IDENTIFIER                            |
|--------------------------------------------------------------------------------|---------------------|---------------------------------------|
| Scrambled siRNA                                                                | Sigma               | MISSION Universal Negative Control #1 |
| PI3KC2 $\alpha$ siRNA<br>GCACAAACCCAGGCUAUUU                                   | Posor, et. al. 2013 |                                       |
| musPI3KC2a377_KasI_forward<br>GATCGGCGCCGTACAGAATGACGAGGTGGCAGCTTTTTG          | This paper          |                                       |
| musPI3KC2a1539_XbaI_reverse<br>GATCTCTAGATTATTCTCATCACGAAGTAAAGGGTGG           | This paper          |                                       |
| musPI3KC2a1686_XbaI_reverse<br>GATCTCTAGATTATAGATACGTTGCCGAGTCAGCTG            | This paper          |                                       |
| musPI3KC2a1400_XbaI_reverse<br>GATCTCTAGATTAGCCAGAAAAACGTAGCTGAGCAAGGTTA<br>TG | This paper          |                                       |
| MusPI3KC2a_1409BamHI_forward<br>GATCGGATCCCTTTCATTCTCACGAAAACATACTC            | This paper          |                                       |
| MusPI3KC2a_1686NotI_reverse<br>GATCGCGGCCGCTTATAGATACGTTGCCGAGTCAGCTG          | This paper          |                                       |
| MusPI3KC2a_1539NotI_reverse<br>GATCGCGGCCGCTTATTCTCATCACGAAGTAAAGGGTGG         | This paper          |                                       |
| MusPI3KC2a1561_BamHI_forwar<br>GATCGGATCCGGAGCAGTGAAGTTATCTGTTTCTTAC           | This paper          |                                       |
| MusPI3KC2a_533-544/GSGS_forward<br>AGAACCCTTTAAATCCACAGGTGCTTCATCATC           | This paper          |                                       |
| MusPI3KC2a_533-544/GSGS_reverse<br>GGCTCTGTCATGACAAGACACCCTGTTGAAG             | This paper          |                                       |
| musPI3KC2a1384_XbaI_reverse<br>GATCTCTAGATTAGGCAATGCTTCCCAAACCTGACTCAATC       | This paper          |                                       |
| musPI3KC2a550-665/SAGAGSGA_forward<br>CGCACCCGAGAGTGTCTTGTGTCATGACAGAGCCAG     | This paper          |                                       |
| musPI3KC2a550-665/SAGAGSGA_reverse<br>GGTAGTGCCGTTTCTACAGGCTGTCCCGAGG          | This paper          |                                       |
| musPI3KC2a545_EcoRI_forward<br>GATCGAATTCGGCTCTGTCATGACAAGACAC                 | This paper          |                                       |
| musPI3KC2a668_NotI_reverse<br>GATCGCGGCCGCTTAGCCTGTAGAACACCTACTAG              | This paper          |                                       |
| hPI3KC2a1283-1284A2_forward<br>TGCGAAGCTGCCAAACATCTGTGC                        | This paper          |                                       |
| hPI3KC2a1283-1284A2_reverse<br>GCGGGATCGGGCTCCTTTTGT                           | This paper          |                                       |
| hPI3KC2a_H1391A_forward<br>TGCGAAGCTGCCAAACATCTGTGC                            | This paper          |                                       |
| hPI3KC2a_H1391A_reverse<br>GCGGGATCGGGCTCCTTTTGT                               | This paper          |                                       |
| mPI3KC2aK1283A_forward<br>CGAAGCTACCAAACATCTGTGCATG                            | This paper          |                                       |
| mPI3KC2aK1283A_reverse<br>CAAGGGACCGAGCTCCTTTTGTGC                             | This paper          |                                       |
| mPI3KC2a1283-1284A2_forward<br>TGCGAAGCTACCAAACATCTGTGCATG                     | This paper          |                                       |
| mPI3KC2a1283-1284A2_reverse<br>GCGGACCGAGCTCCTTTTGTGCTTAC                      | This paper          |                                       |

|                                                                     |            |  |
|---------------------------------------------------------------------|------------|--|
| musPI3KC2aR1284A_forward<br>CTTTGAAGCTACCAAACATCTGTGC               | This paper |  |
| musPI3KC2aR1284A_reverse<br>CGGACCGAGCTCCTTTTGTGC                   | This paper |  |
| mPI3KC2a426_428A2_forward<br>ACTGCCACACTGGCATTCTCCCCACAC            | This paper |  |
| mPI3KC2a426_428A2_reverse<br>CGCCATTGAAATTGAAGGGCTTCAACT            | This paper |  |
| mPI3KC2a458_460_461A3_forward<br>TACGGCGCAAAGGGCTTGATTATAATTATTCTAC | This paper |  |
| mC2a458_460_461A3_reverse<br>GCAGCTGACTTGAATCAAGTGGATGTTGGCAG       | This paper |  |
| hPI3KC2a426_428A2_forward<br>ACTGCCACACTAGCATTTTCTCCGCATATGT        | This paper |  |
| hPI3KC2a426_428A2_reverse<br>CGCCATTGACATTGAAGGATTTTCAAGTACC        | This paper |  |
| hPI3KC2a458_460_461A3_forward<br>TACGGCGCAAAGGGCTTGATTATAATGATTCTAC | This paper |  |
| hPI3C2a458_460_461A3_reverse<br>GCAGCTGACTTGAATCAAGTAGATGTTGGCAG    | This paper |  |
| mC2a1391A_forward<br>CAATGAAGAAATTAACCTTTGTGGCAATGCTTC              | This paper |  |
| mC2a1391A_reverse<br>CTAACCTTGCTCAGCTACGTTTTTCTG                    | This paper |  |

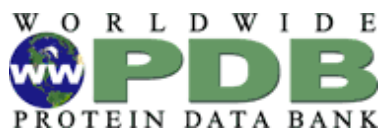

## Full wwPDB X-ray Structure Validation Report ⓘ

Jan 18, 2021 – 12:49 PM GMT

PDB ID : 7BI2  
Title : PI3KC2aDeltaN and DeltaC-C2  
Deposited on : 2021-01-12  
Resolution : 3.25 Å (reported)

This is a Full wwPDB X-ray Structure Validation Report.

This report is produced by the wwPDB biocuration pipeline after annotation of the structure.

We welcome your comments at [validation@mail.wwpdb.org](mailto:validation@mail.wwpdb.org)

A user guide is available at

<https://www.wwpdb.org/validation/2017/XrayValidationReportHelp>

with specific help available everywhere you see the ⓘ symbol.

---

The following versions of software and data (see [references ⓘ](#)) were used in the production of this report:

MolProbity : 4.02b-467  
Mogul : 1.8.5 (274361), CSD as541be (2020)  
Xtriage (Phenix) : 1.13  
EDS : 2.16  
buster-report : 1.1.7 (2018)  
Percentile statistics : 20191225.v01 (using entries in the PDB archive December 25th 2019)  
Refmac : 5.8.0158  
CCP4 : 7.0.044 (Gargrove)  
Ideal geometry (proteins) : Engh & Huber (2001)  
Ideal geometry (DNA, RNA) : Parkinson et al. (1996)  
Validation Pipeline (wwPDB-VP) : 2.16

## 1 Overall quality at a glance i

The following experimental techniques were used to determine the structure:  
*X-RAY DIFFRACTION*

The reported resolution of this entry is 3.25 Å.

Percentile scores (ranging between 0-100) for global validation metrics of the entry are shown in the following graphic. The table shows the number of entries on which the scores are based.

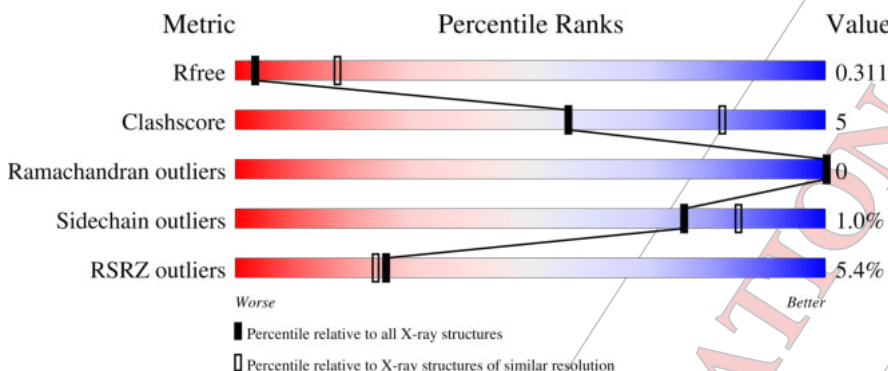

| Metric                | Whole archive<br>(#Entries) | Similar resolution<br>(#Entries, resolution range(Å)) |
|-----------------------|-----------------------------|-------------------------------------------------------|
| $R_{free}$            | 130704                      | 1191 (3.30-3.22)                                      |
| Clashscore            | 141614                      | 1251 (3.30-3.22)                                      |
| Ramachandran outliers | 138981                      | 1229 (3.30-3.22)                                      |
| Sidechain outliers    | 138945                      | 1228 (3.30-3.22)                                      |
| RSRZ outliers         | 127900                      | 1154 (3.30-3.22)                                      |

The table below summarises the geometric issues observed across the polymeric chains and their fit to the electron density. The red, orange, yellow and green segments of the lower bar indicate the fraction of residues that contain outliers for  $\geq 3$ , 2, 1 and 0 types of geometric quality criteria respectively. A grey segment represents the fraction of residues that are not modelled. The numeric value for each fraction is indicated below the corresponding segment, with a dot representing fractions  $\leq 5\%$ . The upper red bar (where present) indicates the fraction of residues that have poor fit to the electron density. The numeric value is given above the bar.

| Mol | Chain | Length | Quality of chain                                                                                                                                                                                                                                                                                                                                                                                           |
|-----|-------|--------|------------------------------------------------------------------------------------------------------------------------------------------------------------------------------------------------------------------------------------------------------------------------------------------------------------------------------------------------------------------------------------------------------------|
| 1   | A     | 1157   | <div style="display: flex; align-items: center;"> <div style="width: 5%; height: 10px; background-color: red; margin-right: 5px;"></div> <div style="width: 77%; height: 10px; background-color: green; margin-right: 5px;"></div> <div style="width: 12%; height: 10px; background-color: yellow; margin-right: 5px;"></div> <div style="width: 12%; height: 10px; background-color: grey;"></div> </div> |

The following table lists non-polymeric compounds, carbohydrate monomers and non-standard residues in protein, DNA, RNA chains that are outliers for geometric or electron-density-fit criteria:

| Mol | Type | Chain | Res  | Chirality | Geometry | Clashes | Electron density |
|-----|------|-------|------|-----------|----------|---------|------------------|
| 2   | EDO  | A     | 1201 | -         | -        | -       | X                |

*Continued on next page...*

*Continued from previous page...*

| Mol | Type | Chain | Res  | Chirality | Geometry | Clashes | Electron density |
|-----|------|-------|------|-----------|----------|---------|------------------|
| 3   | 17G  | A     | 1202 | -         | -        | -       | X                |
| 4   | IOD  | A     | 1205 | -         | -        | X       | -                |
| 4   | IOD  | A     | 1206 | -         | -        | X       | -                |
| 4   | IOD  | A     | 1207 | -         | -        | -       | X                |

## 2 Entry composition [i](#)

There are 5 unique types of molecules in this entry. The entry contains 8284 atoms, of which 0 are hydrogens and 0 are deuteriums.

In the tables below, the ZeroOcc column contains the number of atoms modelled with zero occupancy, the AltConf column contains the number of residues with at least one atom in alternate conformation and the Trace column contains the number of residues modelled with at most 2 atoms.

- Molecule 1 is a protein called Phosphatidylinositol 4-phosphate 3-kinase C2 domain-containing subunit alpha, Phosphatidylinositol 4-phosphate 3-kinase C2 domain-containing subunit alpha.

| Mol | Chain | Residues | Atoms |      |      |      |    | ZeroOcc | AltConf | Trace |
|-----|-------|----------|-------|------|------|------|----|---------|---------|-------|
|     |       |          | Total | C    | N    | O    | S  |         |         |       |
| 1   | A     | 1021     | 8224  | 5297 | 1388 | 1493 | 46 | 0       | 1       | 0     |

There are 7 discrepancies between the modelled and reference sequences:

| Chain | Residue | Modelled | Actual | Comment        | Reference  |
|-------|---------|----------|--------|----------------|------------|
| A     | 1       | GLY      | -      | expression tag | UNP Q61194 |
| A     | 2       | ALA      | -      | expression tag | UNP Q61194 |
| A     | 159     | GLY      | -      | linker         | UNP Q61194 |
| A     | 160     | SER      | -      | linker         | UNP Q61194 |
| A     | 161     | GLY      | -      | linker         | UNP Q61194 |
| A     | 162     | SER      | -      | linker         | UNP Q61194 |
| A     | 286     | GLY      | ALA    | conflict       | UNP Q61194 |

- Molecule 2 is 1,2-ETHANEDIOL (three-letter code: EDO) (formula: C<sub>2</sub>H<sub>6</sub>O<sub>2</sub>).

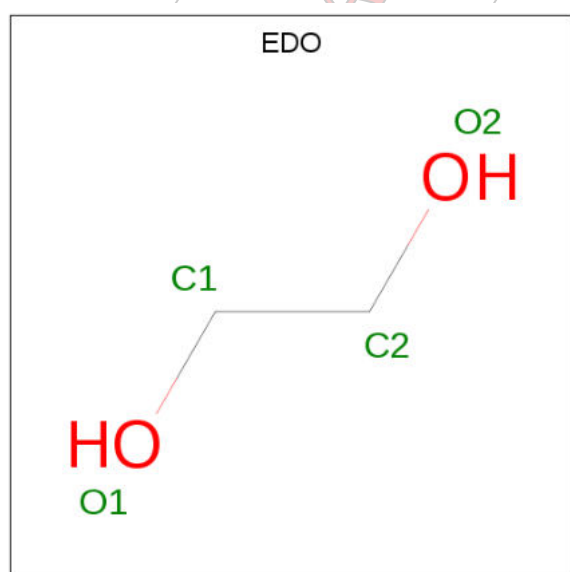



| Mol | Chain | Residues | Atoms |   |   | ZeroOcc | AltConf |
|-----|-------|----------|-------|---|---|---------|---------|
| 2   | A     | 1        | Total | C | O | 0       | 0       |
|     |       |          | 4     | 2 | 2 |         |         |

- Molecule 3 is 9-(6-aminopyridin-3-yl)-1-[3-(trifluoromethyl)phenyl]benzo[h][1,6]naphthyridin-2(1H)-one (three-letter code: 17G) (formula: C<sub>24</sub>H<sub>15</sub>F<sub>3</sub>N<sub>4</sub>O).

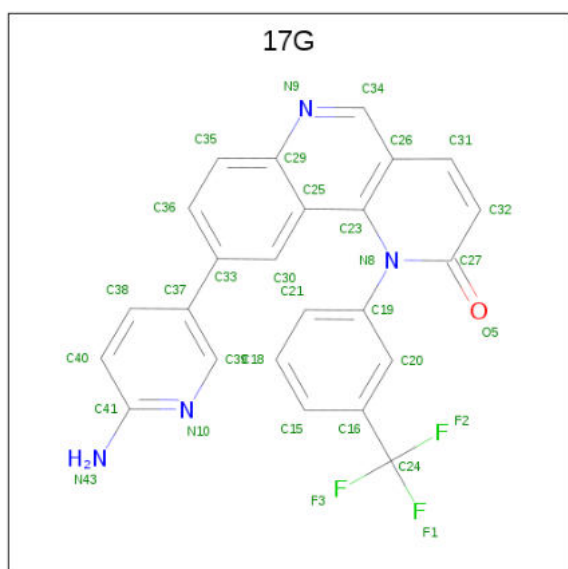

| Mol | Chain | Residues | Atoms |    |   |   | ZeroOcc | AltConf |   |
|-----|-------|----------|-------|----|---|---|---------|---------|---|
| 3   | A     | 1        | Total | C  | F | N | O       | 0       | 0 |
|     |       |          | 32    | 24 | 3 | 4 | 1       |         |   |

- Molecule 4 is IODIDE ION (three-letter code: IOD) (formula: I).

| Mol | Chain | Residues | Atoms |   | ZeroOcc | AltConf |
|-----|-------|----------|-------|---|---------|---------|
| 4   | A     | 5        | Total | I | 0       | 0       |
|     |       |          | 5     | 5 |         |         |

- Molecule 5 is water.

| Mol | Chain | Residues | Atoms |    | ZeroOcc | AltConf |
|-----|-------|----------|-------|----|---------|---------|
| 5   | A     | 19       | Total | O  | 0       | 0       |
|     |       |          | 19    | 19 |         |         |

### 3 Residue-property plots

These plots are drawn for all protein, RNA, DNA and oligosaccharide chains in the entry. The first graphic for a chain summarises the proportions of the various outlier classes displayed in the second graphic. The second graphic shows the sequence view annotated by issues in geometry and electron density. Residues are color-coded according to the number of geometric quality criteria for which they contain at least one outlier: green = 0, yellow = 1, orange = 2 and red = 3 or more. A red dot above a residue indicates a poor fit to the electron density ( $RSRZ > 2$ ). Stretches of 2 or more consecutive residues without any outlier are shown as a green connector. Residues present in the sample, but not in the model, are shown in grey.

- Molecule 1: Phosphatidylinositol 4-phosphate 3-kinase C2 domain-containing subunit alpha,Phosphatidylinositol 4-phosphate 3-kinase C2 domain-containing subunit alpha

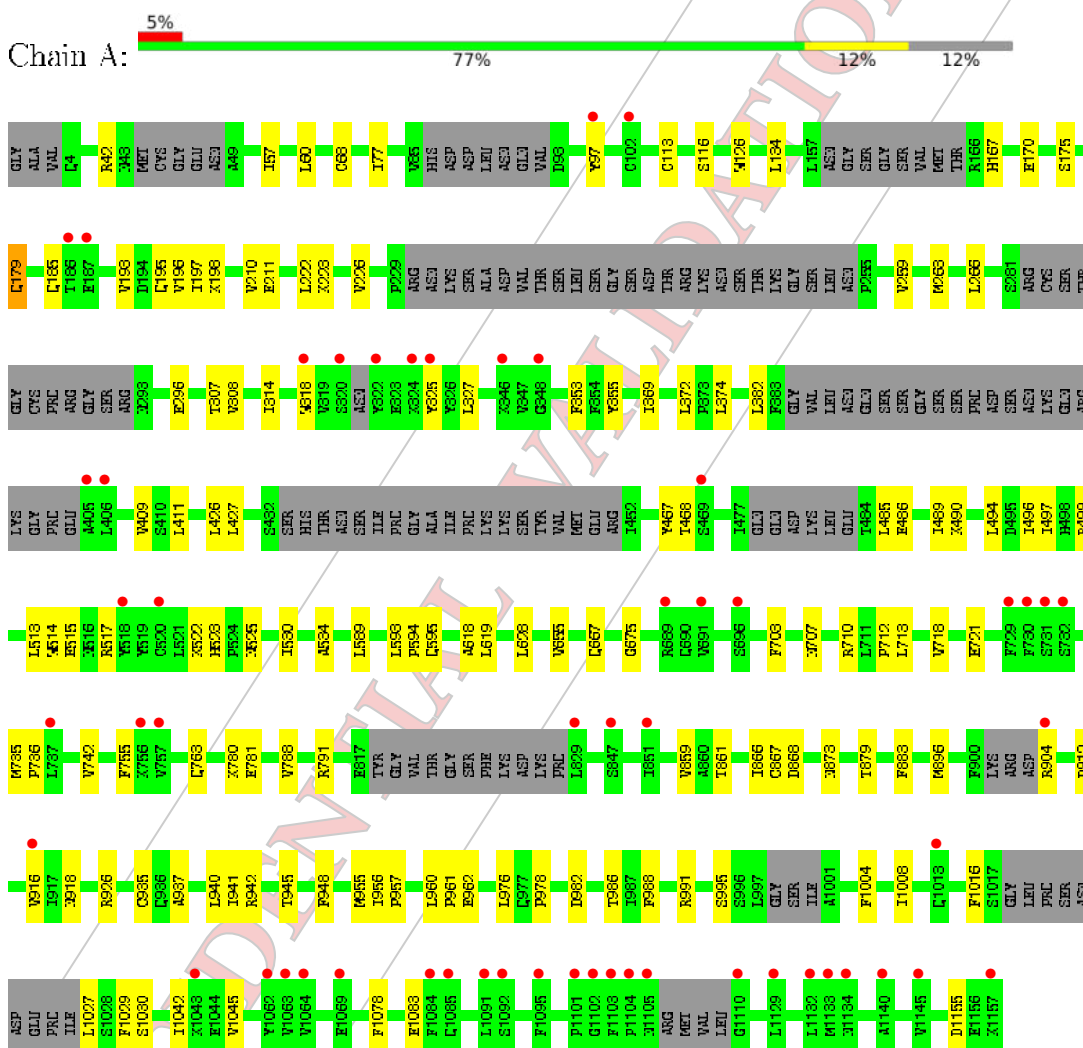

## 4 Data and refinement statistics

| Property                                                                | Value                                                  | Source           |
|-------------------------------------------------------------------------|--------------------------------------------------------|------------------|
| Space group                                                             | P 21 21 21                                             | Depositor        |
| Cell constants<br>a, b, c, $\alpha$ , $\beta$ , $\gamma$                | 82.56Å 115.89Å 144.37Å<br>90.00° 90.00° 90.00°         | Depositor        |
| Resolution (Å)                                                          | 49.20 – 3.25<br>49.20 – 3.25                           | Depositor<br>EDS |
| % Data completeness<br>(in resolution range)                            | 99.1 (49.20-3.25)<br>99.1 (49.20-3.25)                 | Depositor<br>EDS |
| $R_{merge}$                                                             | (Not available)                                        | Depositor        |
| $R_{sym}$                                                               | (Not available)                                        | Depositor        |
| $\langle I/\sigma(I) \rangle$ <sup>1</sup>                              | 1.15 (at 3.25Å)                                        | Xtrriage         |
| Refinement program                                                      | REFMAC 5.8.0258                                        | Depositor        |
| $R$ , $R_{free}$                                                        | 0.266 ; 0.312<br>0.263 ; 0.311                         | Depositor<br>DCC |
| $R_{free}$ test set                                                     | 1113 reflections (5.00%)                               | wwPDB-VP         |
| Wilson B-factor (Å <sup>2</sup> )                                       | 109.8                                                  | Xtrriage         |
| Anisotropy                                                              | 0.419                                                  | Xtrriage         |
| Bulk solvent $k_{sol}$ (e/Å <sup>3</sup> ), $B_{sol}$ (Å <sup>2</sup> ) | 0.27 ; 62.7                                            | EDS              |
| L-test for twinning <sup>2</sup>                                        | $\langle  L  \rangle$ 0.47, $\langle L^2 \rangle$ 0.30 | Xtrriage         |
| Estimated twinning fraction                                             | No twinning to report.                                 | Xtrriage         |
| $F_o:F_c$ correlation                                                   | 0.93                                                   | EDS              |
| Total number of atoms                                                   | 8284                                                   | wwPDB-VP         |
| Average B, all atoms (Å <sup>2</sup> )                                  | 137.0                                                  | wwPDB-VP         |

Xtrriage's analysis on translational NCS is as follows: *The largest off-origin peak in the Patterson function is 3.92% of the height of the origin peak. No significant pseudotranslation is detected.*

<sup>1</sup> Intensities estimated from amplitudes.

<sup>2</sup> Theoretical values of  $\langle |L| \rangle$ ,  $\langle L^2 \rangle$  for acentric reflections are 0.5, 0.333 respectively for untwinned datasets, and 0.375, 0.2 for perfectly twinned datasets.

## 5 Model quality

### 5.1 Standard geometry

Bond lengths and bond angles in the following residue types are not validated in this section: 17G, IOD, EDO

The Z score for a bond length (or angle) is the number of standard deviations the observed value is removed from the expected value. A bond length (or angle) with  $|Z| > 5$  is considered an outlier worth inspection. RMSZ is the root-mean-square of all Z scores of the bond lengths (or angles).

| Mol | Chain | Bond lengths |         | Bond angles |         |
|-----|-------|--------------|---------|-------------|---------|
|     |       | RMSZ         | # Z  >5 | RMSZ        | # Z  >5 |
| 1   | A     | 0.64         | 0/8400  | 0.70        | 0/11357 |

There are no bond length outliers.

There are no bond angle outliers.

There are no chirality outliers.

There are no planarity outliers.

### 5.2 Too-close contacts

In the following table, the Non-H and H(model) columns list the number of non-hydrogen atoms and hydrogen atoms in the chain respectively. The H(added) column lists the number of hydrogen atoms added and optimized by MolProbity. The Clashes column lists the number of clashes within the asymmetric unit, whereas Symm-Clashes lists symmetry-related clashes.

| Mol | Chain | Non-H | H(model) | H(added) | Clashes | Symm-Clashes |
|-----|-------|-------|----------|----------|---------|--------------|
| 1   | A     | 8224  | 0        | 8295     | 80      | 0            |
| 2   | A     | 4     | 0        | 6        | 0       | 0            |
| 3   | A     | 32    | 0        | 15       | 2       | 0            |
| 4   | A     | 5     | 0        | 0        | 5       | 0            |
| 5   | A     | 19    | 0        | 0        | 0       | 0            |
| All | All   | 8284  | 0        | 8316     | 82      | 0            |

The all-atom clashscore is defined as the number of clashes found per 1000 atoms (including hydrogen atoms). The all-atom clashscore for this structure is 5.

All (82) close contacts within the same asymmetric unit are listed below, sorted by their clash magnitude.

| Atom-1             | Atom-2             | Interatomic distance (Å) | Clash overlap (Å) |
|--------------------|--------------------|--------------------------|-------------------|
| 1:A:307:TIIR:OG1   | 4:A:1203:IOD:I     | 2.74                     | 0.75              |
| 1:A:60:LEU:O       | 4:A:1205:IOD:I     | 2.79                     | 0.71              |
| 1:A:409:VAL:IIG21  | 1:A:427:LEU:IIB3   | 1.78                     | 0.66              |
| 1:A:57:ILE:O       | 4:A:1205:IOD:I     | 2.84                     | 0.65              |
| 1:A:523:IIS:IIB3   | 4:A:1206:IOD:I     | 2.68                     | 0.64              |
| 3:A:1202:17G:C19   | 3:A:1202:17G:II8   | 2.29                     | 0.62              |
| 1:A:513:LEU:IID21  | 1:A:530:ILE:IIG12  | 1.83                     | 0.61              |
| 1:A:318:TRP:O      | 1:A:325:TYR:OH     | 2.21                     | 0.58              |
| 1:A:867:CYS:SG     | 1:A:896:MET:IIB2   | 2.44                     | 0.58              |
| 1:A:525:ASN:IIB2   | 4:A:1206:IOD:I     | 2.74                     | 0.58              |
| 1:A:935:CYS:IIB3   | 1:A:986:TIIR:IIG22 | 1.86                     | 0.57              |
| 1:A:222:LEU:IID22  | 1:A:266:LEU:IID11  | 1.87                     | 0.57              |
| 1:A:593:LEU:N      | 1:A:594:PRO:IID2   | 2.20                     | 0.56              |
| 1:A:918:ASN:IIB2   | 1:A:926:ARG:IIG3   | 1.88                     | 0.56              |
| 1:A:514:TRP:CD1    | 1:A:534:ALA:IIA    | 2.42                     | 0.54              |
| 1:A:496:ILE:IIA    | 1:A:499:ARG:IID3   | 1.89                     | 0.54              |
| 1:A:995:SER:IIB2   | 1:A:1008:ILE:IIG13 | 1.88                     | 0.54              |
| 1:A:961:PRO:O      | 1:A:962:GLU:IIB2   | 2.07                     | 0.54              |
| 1:A:374:LEU:IIB2   | 1:A:467:TYR:CE2    | 2.42                     | 0.54              |
| 1:A:411:LEU:IID12  | 1:A:427:LEU:IID21  | 1.89                     | 0.53              |
| 1:A:193:VAL:IIG21  | 1:A:226:VAL:IIG21  | 1.91                     | 0.53              |
| 1:A:486:GLU:IIB2   | 1:A:489:ILE:IID11  | 1.91                     | 0.53              |
| 1:A:763:GLN:IIA    | 1:A:960:LEU:IID11  | 1.92                     | 0.51              |
| 1:A:494:LEU:IIA    | 1:A:497:ILE:IIG12  | 1.93                     | 0.50              |
| 1:A:42:ARG:NI1     | 1:A:780:LYS:O      | 2.44                     | 0.50              |
| 1:A:496:ILE:IIG22  | 1:A:513:LEU:IID12  | 1.92                     | 0.50              |
| 1:A:113:CYS:SG     | 1:A:116:SER:IIB2   | 2.51                     | 0.50              |
| 1:A:942:ARG:O      | 1:A:945:TIIR:IIG23 | 2.12                     | 0.50              |
| 1:A:485:LEU:IIB3   | 1:A:490:LYS:IIE3   | 1.94                     | 0.49              |
| 1:A:1027:LEU:IID23 | 1:A:1030:SER:IIB3  | 1.94                     | 0.49              |
| 1:A:327:LEU:IID23  | 1:A:382:LEU:IIA    | 1.95                     | 0.49              |
| 1:A:193:VAL:IIG13  | 1:A:222:LEU:IID21  | 1.95                     | 0.48              |
| 1:A:703:PIIE:O     | 1:A:707:ASN:IIB2   | 2.13                     | 0.48              |
| 1:A:314:ILE:IIG22  | 1:A:355:TYR:O      | 2.13                     | 0.48              |
| 1:A:593:LEU:IID21  | 1:A:628:LEU:IIG    | 1.96                     | 0.48              |
| 1:A:68:CYS:SG      | 1:A:77:ILE:IIG12   | 2.54                     | 0.47              |
| 1:A:619:LEU:IID21  | 1:A:655:VAL:IIG22  | 1.96                     | 0.47              |
| 1:A:945:TIIR:IIG22 | 1:A:976:LEU:IID13  | 1.97                     | 0.46              |
| 1:A:861:TIIR:IIA   | 1:A:866:ILE:CG2    | 2.46                     | 0.46              |
| 1:A:982:ASP:O      | 1:A:986:TIIR:IIG23 | 2.15                     | 0.45              |
| 1:A:618:ALA:IIB2   | 1:A:628:LEU:IID12  | 1.99                     | 0.45              |
| 1:A:226:VAL:IIG22  | 1:A:259:VAL:IIG22  | 1.97                     | 0.45              |

Continued on next page...

Continued from previous page...

| Atom-1             | Atom-2             | Interatomic distance (Å) | Clash overlap (Å) |
|--------------------|--------------------|--------------------------|-------------------|
| 1:A:60:LEU:IID12   | 1:A:60:LEU:N       | 2.31                     | 0.45              |
| 1:A:496:ILE:CG2    | 1:A:513:LEU:IID12  | 2.47                     | 0.45              |
| 1:A:721:GLU:O      | 1:A:742:VAL:IIG12  | 2.16                     | 0.45              |
| 1:A:1004:PIIE:O    | 1:A:1008:ILE:IIG12 | 2.16                     | 0.45              |
| 1:A:175:SER:O      | 1:A:179:GLN:NE2    | 2.50                     | 0.45              |
| 1:A:781:GLU:IIG3   | 1:A:940:LEU:IID22  | 1.98                     | 0.45              |
| 1:A:515:GLU:OE1    | 1:A:515:GLU:IIA    | 2.16                     | 0.44              |
| 1:A:713:LEU:IID21  | 1:A:791:ARG:IIB2   | 2.00                     | 0.44              |
| 1:A:912:ASP:O      | 1:A:916:VAL:IIG23  | 2.17                     | 0.44              |
| 1:A:195:GLN:IIA    | 1:A:198:LYS:IID2   | 2.00                     | 0.43              |
| 1:A:222:LEU:IID22  | 1:A:266:LEU:CD1    | 2.48                     | 0.43              |
| 1:A:589:LEU:CD2    | 1:A:593:LEU:IID13  | 2.49                     | 0.43              |
| 1:A:514:TRP:O      | 1:A:517:ARG:IIB2   | 2.19                     | 0.43              |
| 1:A:988:PIIE:O     | 1:A:991:ARG:IIG2   | 2.19                     | 0.43              |
| 1:A:308:VAL:IIG23  | 1:A:308:VAL:O      | 2.20                     | 0.42              |
| 1:A:595:GLN:NE2    | 1:A:955:MET:SD     | 2.92                     | 0.42              |
| 1:A:1042:ILE:IIG21 | 1:A:1045:VAL:IIG23 | 2.01                     | 0.42              |
| 1:A:1078:PIIE:IID1 | 1:A:1155:ASP:IIA   | 1.84                     | 0.42              |
| 1:A:859:VAL:IIG21  | 1:A:937:ALA:IIB3   | 2.01                     | 0.42              |
| 1:A:941:ILE:IIG23  | 1:A:948:PIIE:CE1   | 2.55                     | 0.42              |
| 1:A:945:TIIR:IIG21 | 1:A:978:PRO:IIG3   | 2.00                     | 0.42              |
| 1:A:788:VAL:IIB    | 1:A:883:PIIE:IIB3  | 2.01                     | 0.42              |
| 1:A:956:ILE:N      | 1:A:957:PRO:CD     | 2.83                     | 0.42              |
| 1:A:211:GLU:OE1    | 1:A:353:PIIE:IIB2  | 2.20                     | 0.41              |
| 1:A:735:MET:N      | 1:A:736:PRO:IID3   | 2.35                     | 0.41              |
| 1:A:513:LEU:CD2    | 1:A:530:ILE:IIG12  | 2.49                     | 0.41              |
| 1:A:861:TIIR:IIA   | 1:A:866:ILE:IIG22  | 2.01                     | 0.41              |
| 1:A:868:ASP:O      | 1:A:873:ASN:ND2    | 2.53                     | 0.41              |
| 1:A:522:LYS:IIG3   | 1:A:523:IIIS:CD2   | 2.55                     | 0.41              |
| 1:A:97:TYR:IIB3    | 1:A:134:LEU:IID11  | 2.03                     | 0.41              |
| 1:A:210:VAL:IIG11  | 1:A:426:LEU:IID21  | 2.03                     | 0.41              |
| 1:A:1029:PIIE:CD1  | 1:A:1083:GLU:IIG2  | 2.56                     | 0.41              |
| 1:A:197:ILE:IID13  | 1:A:223:LYS:IIE2   | 2.02                     | 0.41              |
| 1:A:296:GLU:OE2    | 1:A:468:TIIR:OG1   | 2.37                     | 0.41              |
| 1:A:710:ARG:IIG2   | 1:A:718:VAL:IIG22  | 2.02                     | 0.41              |
| 1:A:667:GLN:IIE21  | 1:A:712:PRO:IIA    | 1.85                     | 0.40              |
| 3:A:1202:17G:II9   | 3:A:1202:17G:II11  | 1.83                     | 0.40              |
| 1:A:369:ILE:O      | 1:A:372:LEU:IIB2   | 2.22                     | 0.40              |
| 1:A:675:GLY:IIA2   | 1:A:755:PIIE:IIE2  | 1.86                     | 0.40              |
| 1:A:193:VAL:O      | 1:A:196:VAL:IIB    | 2.21                     | 0.40              |

There are no symmetry-related clashes.

## 5.3 Torsion angles

### 5.3.1 Protein backbone

In the following table, the Percentiles column shows the percent Ramachandran outliers of the chain as a percentile score with respect to all X-ray entries followed by that with respect to entries of similar resolution.

The Analysed column shows the number of residues for which the backbone conformation was analysed, and the total number of residues.

| Mol | Chain | Analysed       | Favoured  | Allowed | Outliers | Percentiles |
|-----|-------|----------------|-----------|---------|----------|-------------|
| 1   | A     | 992/1157 (86%) | 945 (95%) | 47 (5%) | 0        | 100 100     |

There are no Ramachandran outliers to report.

### 5.3.2 Protein sidechains

In the following table, the Percentiles column shows the percent sidechain outliers of the chain as a percentile score with respect to all X-ray entries followed by that with respect to entries of similar resolution.

The Analysed column shows the number of residues for which the sidechain conformation was analysed, and the total number of residues.

| Mol | Chain | Analysed       | Rotameric | Outliers | Percentiles |
|-----|-------|----------------|-----------|----------|-------------|
| 1   | A     | 920/1036 (89%) | 911 (99%) | 9 (1%)   | 76 85       |

All (9) residues with a non-rotameric sidechain are listed below:

| Mol | Chain | Res  | Type |
|-----|-------|------|------|
| 1   | A     | 126  | TRP  |
| 1   | A     | 167  | HIS  |
| 1   | A     | 170  | GLU  |
| 1   | A     | 179  | GLN  |
| 1   | A     | 185  | GLN  |
| 1   | A     | 263  | MET  |
| 1   | A     | 879  | THR  |
| 1   | A     | 904  | ARG  |
| 1   | A     | 1016 | PIIE |

Sometimes sidechains can be flipped to improve hydrogen bonding and reduce clashes. All (3) such sidechains are listed below:

| Mol | Chain | Res | Type |
|-----|-------|-----|------|
| 1   | A     | 109 | GLN  |
| 1   | A     | 523 | IIS  |
| 1   | A     | 623 | GLN  |

### 5.3.3 RNA [i](#)

There are no RNA molecules in this entry.

### 5.4 Non-standard residues in protein, DNA, RNA chains [i](#)

There are no non-standard protein/DNA/RNA residues in this entry.

### 5.5 Carbohydrates [i](#)

There are no monosaccharides in this entry.

### 5.6 Ligand geometry [i](#)

Of 7 ligands modelled in this entry, 5 are monoatomic - leaving 2 for Mogul analysis.

In the following table, the Counts columns list the number of bonds (or angles) for which Mogul statistics could be retrieved, the number of bonds (or angles) that are observed in the model and the number of bonds (or angles) that are defined in the Chemical Component Dictionary. The Link column lists molecule types, if any, to which the group is linked. The Z score for a bond length (or angle) is the number of standard deviations the observed value is removed from the expected value. A bond length (or angle) with  $|Z| > 2$  is considered an outlier worth inspection. RMSZ is the root-mean-square of all Z scores of the bond lengths (or angles).

| Mol | Type | Chain | Res  | Link | Bond lengths |      |             | Bond angles |      |             |
|-----|------|-------|------|------|--------------|------|-------------|-------------|------|-------------|
|     |      |       |      |      | Counts       | RMSZ | # $ Z  > 2$ | Counts      | RMSZ | # $ Z  > 2$ |
| 3   | 17G  | A     | 1202 | -    | 35,36,36     | 2.90 | 8 (22%)     | 49,54,54    | 1.92 | 8 (16%)     |
| 2   | EDO  | A     | 1201 | -    | 3,3,3        | 0.08 | 0           | 2,2,2       | 0.22 | 0           |

In the following table, the Chirals column lists the number of chiral outliers, the number of chiral centers analysed, the number of these observed in the model and the number defined in the Chemical Component Dictionary. Similar counts are reported in the Torsion and Rings columns. '-' means no outliers of that kind were identified.

| Mol | Type | Chain | Res  | Link | Chirals | Torsions   | Rings   |
|-----|------|-------|------|------|---------|------------|---------|
| 3   | 17G  | A     | 1202 | -    | -       | 0/14/14/14 | 0/5/5/5 |
| 2   | EDO  | A     | 1201 | -    | -       | 0/1/1/1    | -       |



All (8) bond length outliers are listed below:

| Mol | Chain | Res  | Type | Atoms   | Z     | Observed(Å) | Ideal(Å) |
|-----|-------|------|------|---------|-------|-------------|----------|
| 3   | A     | 1202 | 17G  | C23-N8  | 11.56 | 1.57        | 1.38     |
| 3   | A     | 1202 | 17G  | C27-N8  | 5.60  | 1.47        | 1.37     |
| 3   | A     | 1202 | 17G  | C31-C26 | 5.25  | 1.54        | 1.41     |
| 3   | A     | 1202 | 17G  | C34-N9  | 5.06  | 1.36        | 1.30     |
| 3   | A     | 1202 | 17G  | C31-C32 | 4.88  | 1.46        | 1.36     |
| 3   | A     | 1202 | 17G  | C41-N43 | 3.67  | 1.46        | 1.35     |
| 3   | A     | 1202 | 17G  | C37-C33 | 3.54  | 1.57        | 1.49     |
| 3   | A     | 1202 | 17G  | O5-C27  | -2.07 | 1.19        | 1.24     |

All (8) bond angle outliers are listed below:

| Mol | Chain | Res  | Type | Atoms       | Z     | Observed(°) | Ideal(°) |
|-----|-------|------|------|-------------|-------|-------------|----------|
| 3   | A     | 1202 | 17G  | C36-C33-C37 | -6.11 | 110.77      | 121.36   |
| 3   | A     | 1202 | 17G  | C19-N8-C23  | 4.97  | 124.38      | 118.76   |
| 3   | A     | 1202 | 17G  | C30-C33-C37 | 4.24  | 130.73      | 121.05   |
| 3   | A     | 1202 | 17G  | C27-N8-C19  | -3.96 | 114.54      | 118.69   |
| 3   | A     | 1202 | 17G  | C31-C26-C34 | -3.77 | 115.87      | 122.63   |
| 3   | A     | 1202 | 17G  | C26-C34-N9  | -3.64 | 120.10      | 125.05   |
| 3   | A     | 1202 | 17G  | C31-C26-C23 | 2.96  | 122.75      | 117.94   |
| 3   | A     | 1202 | 17G  | C37-C39-N10 | -2.11 | 120.84      | 124.32   |

There are no chirality outliers.

There are no torsion outliers.

There are no ring outliers.

1 monomer is involved in 2 short contacts:

| Mol | Chain | Res  | Type | Clashes | Symm-Clashes |
|-----|-------|------|------|---------|--------------|
| 3   | A     | 1202 | 17G  | 2       | 0            |

The following is a two-dimensional graphical depiction of Mogul quality analysis of bond lengths, bond angles, torsion angles, and ring geometry for all instances of the Ligand of Interest. In addition, ligands with molecular weight > 250 and outliers as shown on the validation Tables will also be included. For torsion angles, if less than 5% of the Mogul distribution of torsion angles is within 10 degrees of the torsion angle in question, then that torsion angle is considered an outlier. Any bond that is central to one or more torsion angles identified as an outlier by Mogul will be highlighted in the graph. For rings, the root-mean-square deviation (RMSD) between the ring in question and similar rings identified by Mogul is calculated over all ring torsion angles. If the average RMSD is greater than 60 degrees and the minimal RMSD between the ring in question and any Mogul-identified rings is also greater than 60 degrees, then that ring is considered an outlier. The outliers are highlighted in purple. The color gray indicates Mogul did not find sufficient

equivalents in the CSD to analyse the geometry.

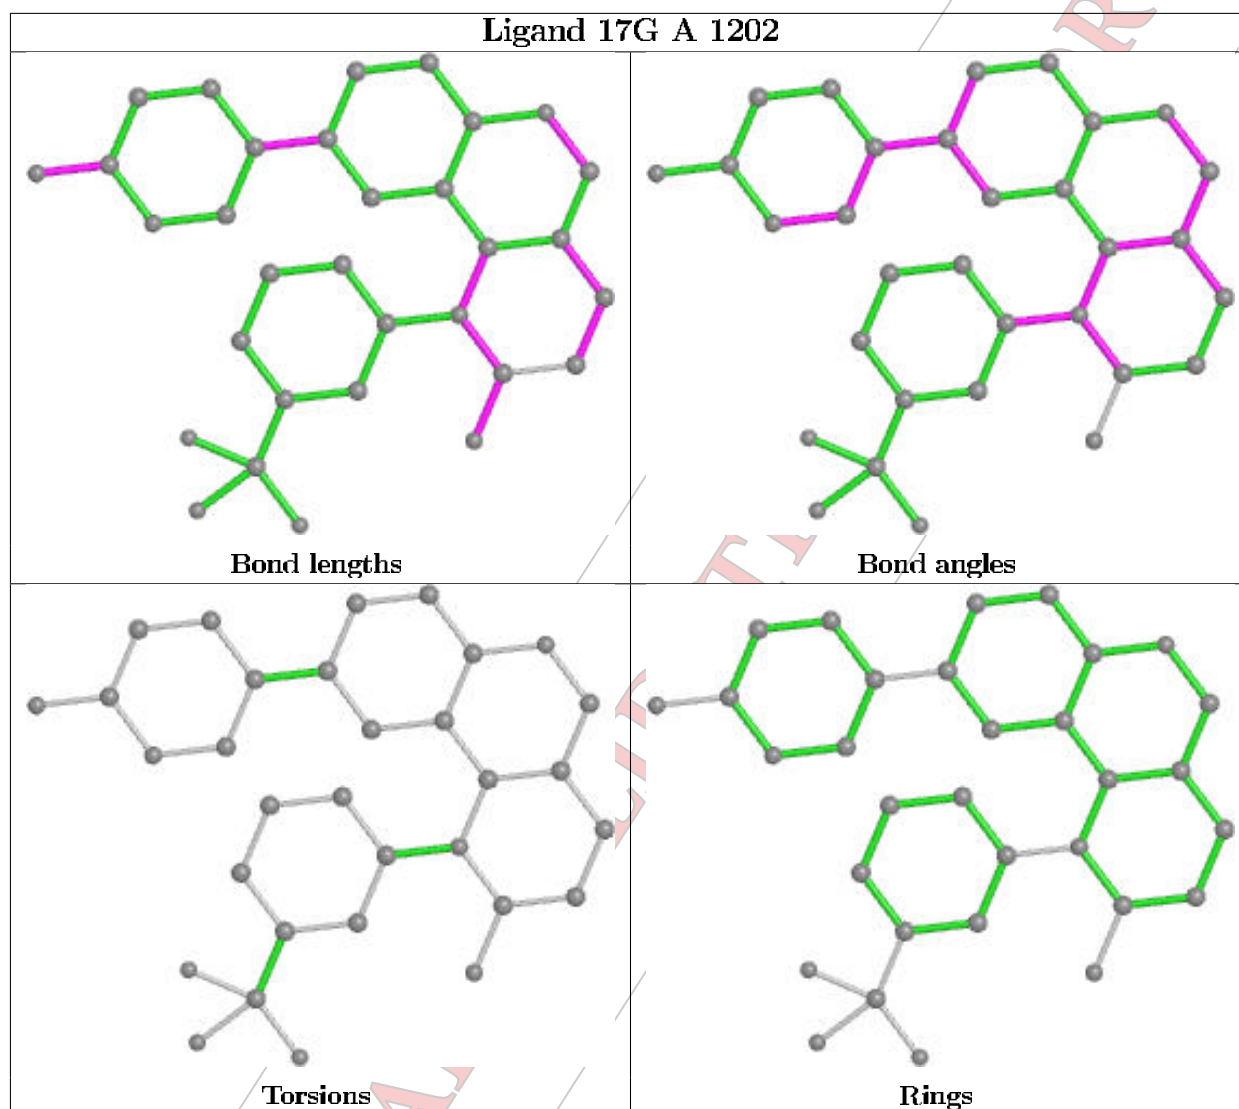

## 5.7 Other polymers [i](#)

There are no such residues in this entry.

## 5.8 Polymer linkage issues [i](#)

There are no chain breaks in this entry.

## 6 Fit of model and data [i](#)

### 6.1 Protein, DNA and RNA chains [i](#)

In the following table, the column labelled '#RSRZ > 2' contains the number (and percentage) of RSRZ outliers, followed by percent RSRZ outliers for the chain as percentile scores relative to all X-ray entries and entries of similar resolution. The OWAB column contains the minimum, median, 95<sup>th</sup> percentile and maximum values of the occupancy-weighted average B-factor per residue. The column labelled 'Q < 0.9' lists the number of (and percentage) of residues with an average occupancy less than 0.9.

| Mol | Chain | Analysed        | <RSRZ> | #RSRZ > 2     | OWAB(Å <sup>2</sup> ) | Q < 0.9 |
|-----|-------|-----------------|--------|---------------|-----------------------|---------|
| 1   | A     | 1021/1157 (88%) | 0.18   | 55 (5%) 25 24 | 76, 130, 193, 268     | 0       |

All (55) RSRZ outliers are listed below:

| Mol | Chain | Res  | Type | RSRZ |
|-----|-------|------|------|------|
| 1   | A     | 1103 | PIIE | 5.6  |
| 1   | A     | 1110 | GLY  | 4.7  |
| 1   | A     | 1102 | GLY  | 4.6  |
| 1   | A     | 1133 | MET  | 4.0  |
| 1   | A     | 737  | LEU  | 3.9  |
| 1   | A     | 1091 | LEU  | 3.8  |
| 1   | A     | 520  | CYS  | 3.7  |
| 1   | A     | 732  | SER  | 3.7  |
| 1   | A     | 1104 | PRO  | 3.7  |
| 1   | A     | 186  | TIIR | 3.6  |
| 1   | A     | 916  | VAL  | 3.4  |
| 1   | A     | 1134 | ASN  | 3.4  |
| 1   | A     | 1084 | PIIE | 3.4  |
| 1   | A     | 689  | ARG  | 3.4  |
| 1   | A     | 325  | TYR  | 3.3  |
| 1   | A     | 1101 | PRO  | 3.3  |
| 1   | A     | 187  | GLU  | 3.2  |
| 1   | A     | 756  | LYS  | 3.1  |
| 1   | A     | 1043 | LYS  | 2.9  |
| 1   | A     | 469  | SER  | 2.9  |
| 1   | A     | 1092 | SER  | 2.9  |
| 1   | A     | 322  | TYR  | 2.9  |
| 1   | A     | 829  | LEU  | 2.9  |
| 1   | A     | 1095 | PIIE | 2.9  |
| 1   | A     | 1069 | GLU  | 2.7  |
| 1   | A     | 1062 | TYR  | 2.7  |
| 1   | A     | 1063 | VAL  | 2.7  |

*Continued on next page...*

Continued from previous page...

| Mol | Chain | Res  | Type | RSRZ |
|-----|-------|------|------|------|
| 1   | A     | 904  | ARG  | 2.7  |
| 1   | A     | 1129 | LEU  | 2.7  |
| 1   | A     | 1132 | LEU  | 2.7  |
| 1   | A     | 851  | ILE  | 2.6  |
| 1   | A     | 757  | VAL  | 2.6  |
| 1   | A     | 405  | ALA  | 2.6  |
| 1   | A     | 1140 | ALA  | 2.6  |
| 1   | A     | 1064 | VAL  | 2.5  |
| 1   | A     | 324  | LYS  | 2.5  |
| 1   | A     | 731  | SER  | 2.5  |
| 1   | A     | 320  | SER  | 2.5  |
| 1   | A     | 1105 | ASN  | 2.5  |
| 1   | A     | 346  | LYS  | 2.4  |
| 1   | A     | 406  | LEU  | 2.4  |
| 1   | A     | 348  | GLY  | 2.3  |
| 1   | A     | 696  | SER  | 2.2  |
| 1   | A     | 729  | PIIE | 2.2  |
| 1   | A     | 1085 | GLN  | 2.2  |
| 1   | A     | 97   | TYR  | 2.1  |
| 1   | A     | 518  | TYR  | 2.1  |
| 1   | A     | 691  | VAL  | 2.1  |
| 1   | A     | 730  | PIIE | 2.1  |
| 1   | A     | 1157 | LYS  | 2.1  |
| 1   | A     | 318  | TRP  | 2.1  |
| 1   | A     | 1145 | VAL  | 2.0  |
| 1   | A     | 102  | CYS  | 2.0  |
| 1   | A     | 1013 | GLN  | 2.0  |
| 1   | A     | 847  | SER  | 2.0  |

## 6.2 Non-standard residues in protein, DNA, RNA chains [i](#)

There are no non-standard protein/DNA/RNA residues in this entry.

## 6.3 Carbohydrates [i](#)

There are no monosaccharides in this entry.

## 6.4 Ligands [i](#)

In the following table, the Atoms column lists the number of modelled atoms in the group and the number defined in the chemical component dictionary. The B-factors column lists the minimum,

median, 95<sup>th</sup> percentile and maximum values of B factors of atoms in the group. The column labelled 'Q< 0.9' lists the number of atoms with occupancy less than 0.9.

| Mol | Type | Chain | Res  | Atoms | RSCC | RSR  | B-factors(Å <sup>2</sup> ) | Q<0.9 |
|-----|------|-------|------|-------|------|------|----------------------------|-------|
| 4   | IOD  | A     | 1204 | 1/1   | 0.40 | 0.22 | 296,296,296,296            | 0     |
| 4   | IOD  | A     | 1206 | 1/1   | 0.43 | 0.19 | 336,336,336,336            | 0     |
| 2   | EDO  | A     | 1201 | 4/4   | 0.67 | 0.49 | 155,166,171,171            | 0     |
| 4   | IOD  | A     | 1207 | 1/1   | 0.68 | 1.01 | 545,545,545,545            | 0     |
| 4   | IOD  | A     | 1205 | 1/1   | 0.71 | 0.22 | 324,324,324,324            | 0     |
| 3   | 17G  | A     | 1202 | 32/32 | 0.76 | 0.53 | 190,221,241,250            | 0     |
| 4   | IOD  | A     | 1203 | 1/1   | 0.82 | 0.32 | 278,278,278,278            | 0     |

The following is a graphical depiction of the model fit to experimental electron density of all instances of the Ligand of Interest. In addition, ligands with molecular weight > 250 and outliers as shown on the geometry validation Tables will also be included. Each fit is shown from different orientation to approximate a three-dimensional view.

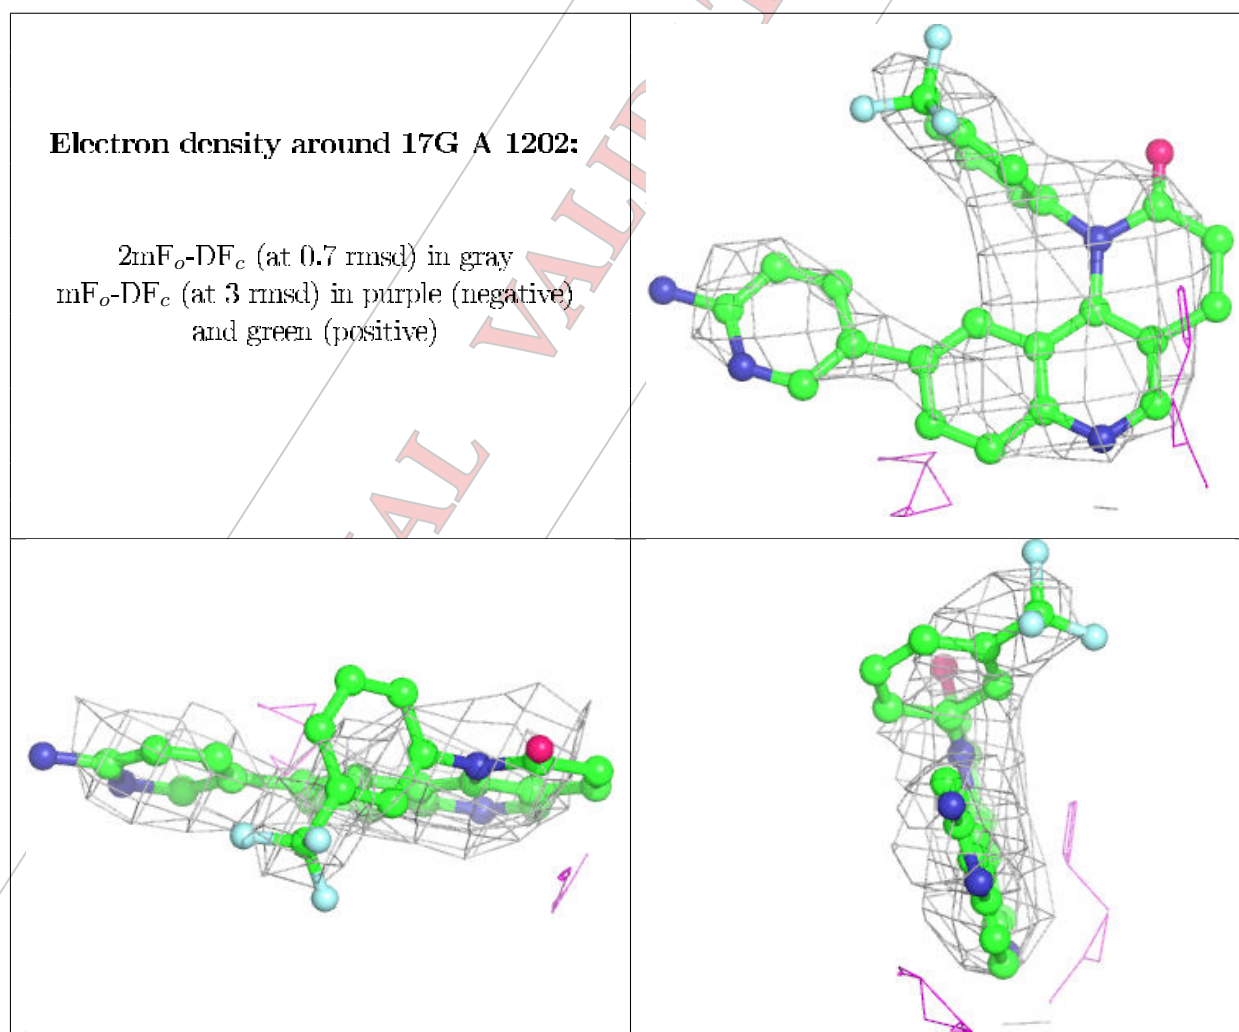

## 6.5 Other polymers [i](#)

There are no such residues in this entry.

CONFIDENTIAL VALIDATION REPORT



## Full wwPDB X-ray Structure Validation Report ⓘ

Jan 14, 2021 – 05:31 PM GMT

PDB ID : 7BI4  
Title : PI3KC2a core apo  
Deposited on : 2021-01-12  
Resolution : 2.42 Å (reported)

This is a Full wwPDB X-ray Structure Validation Report.

This report is produced by the wwPDB biocuration pipeline after annotation of the structure.

We welcome your comments at [validation@mail.wwpdb.org](mailto:validation@mail.wwpdb.org)

A user guide is available at

<https://www.wwpdb.org/validation/2017/XrayValidationReportHelp>

with specific help available everywhere you see the ⓘ symbol.

---

The following versions of software and data (see [references ⓘ](#)) were used in the production of this report:

MolProbity : 4.02b-467  
Mogul : 1.8.5 (274361), CSD as541be (2020)  
Xtriage (Phenix) : 1.13  
EDS : 2.16  
Percentile statistics : 20191225.v01 (using entries in the PDB archive December 25th 2019)  
Refmac : 5.8.0158  
CCP4 : 7.0.044 (Gargrove)  
Ideal geometry (proteins) : Engh & Huber (2001)  
Ideal geometry (DNA, RNA) : Parkinson et al. (1996)  
Validation Pipeline (wwPDB-VP) : 2.16

## 1 Overall quality at a glance i

The following experimental techniques were used to determine the structure:  
*X-RAY DIFFRACTION*

The reported resolution of this entry is 2.42 Å.

Percentile scores (ranging between 0-100) for global validation metrics of the entry are shown in the following graphic. The table shows the number of entries on which the scores are based.

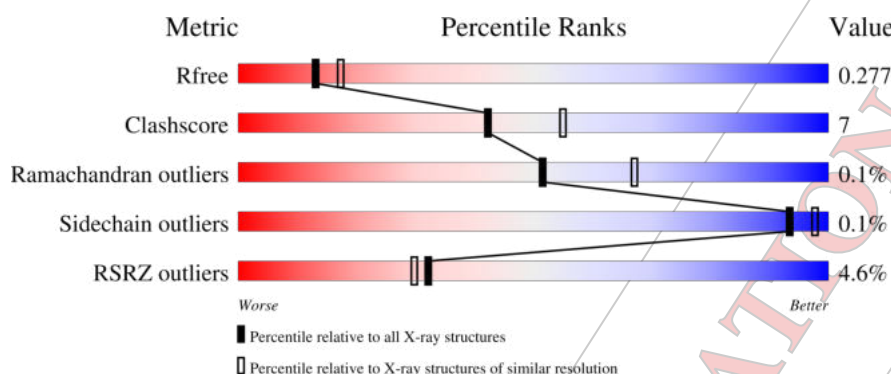

| Metric                | Whole archive<br>(# Entries) | Similar resolution<br>(# Entries, resolution range(Å)) |
|-----------------------|------------------------------|--------------------------------------------------------|
| $R_{free}$            | 130704                       | 4647 (2.44-2.40)                                       |
| Clashscore            | 141614                       | 5161 (2.44-2.40)                                       |
| Ramachandran outliers | 138981                       | 5073 (2.44-2.40)                                       |
| Sidechain outliers    | 138945                       | 5074 (2.44-2.40)                                       |
| RSRZ outliers         | 127900                       | 4543 (2.44-2.40)                                       |

The table below summarises the geometric issues observed across the polymeric chains and their fit to the electron density. The red, orange, yellow and green segments of the lower bar indicate the fraction of residues that contain outliers for  $\geq 3$ , 2, 1 and 0 types of geometric quality criteria respectively. A grey segment represents the fraction of residues that are not modelled. The numeric value for each fraction is indicated below the corresponding segment, with a dot representing fractions  $\leq 5\%$ . The upper red bar (where present) indicates the fraction of residues that have poor fit to the electron density. The numeric value is given above the bar.

| Mol | Chain | Length | Quality of chain                                                                                                                                                                                                                                                                                                                                                                                                                                                                                                                                                    |
|-----|-------|--------|---------------------------------------------------------------------------------------------------------------------------------------------------------------------------------------------------------------------------------------------------------------------------------------------------------------------------------------------------------------------------------------------------------------------------------------------------------------------------------------------------------------------------------------------------------------------|
| 1   | A     | 910    | <div style="display: flex; align-items: center;"> <div style="width: 4%; height: 10px; background-color: red; margin-right: 5px;"></div> <div style="width: 77%; height: 10px; background-color: green; margin-right: 5px;"></div> <div style="width: 12%; height: 10px; background-color: yellow; margin-right: 5px;"></div> <div style="width: 10%; height: 10px; background-color: grey;"></div> </div> <div style="display: flex; justify-content: space-around; margin-top: 5px;"> <span>4%</span> <span>77%</span> <span>12%</span> <span>• 10%</span> </div> |



## 2 Entry composition

There are 4 unique types of molecules in this entry. The entry contains 6652 atoms, of which 0 are hydrogens and 0 are deuteriums.

In the tables below, the ZeroOcc column contains the number of atoms modelled with zero occupancy, the AltConf column contains the number of residues with at least one atom in alternate conformation and the Trace column contains the number of residues modelled with at most 2 atoms.

- Molecule 1 is a protein called Phosphatidylinositol 4-phosphate 3-kinase C2 domain-containing subunit alpha,Phosphatidylinositol 4-phosphate 3-kinase C2 domain-containing subunit alpha.

| Mol | Chain | Residues | Atoms |      |      |      |    | ZeroOcc | AltConf | Trace |
|-----|-------|----------|-------|------|------|------|----|---------|---------|-------|
|     |       |          | Total | C    | N    | O    | S  |         |         |       |
| 1   | A     | 822      | 6554  | 4209 | 1100 | 1204 | 41 | 0       | 2       | 0     |

There are 23 discrepancies between the modelled and reference sequences:

| Chain | Residue | Modelled | Actual | Comment             | Reference  |
|-------|---------|----------|--------|---------------------|------------|
| A     | 1       | GLY      | -      | expression tag      | UNP Q61194 |
| A     | 2       | ALA      | -      | expression tag      | UNP Q61194 |
| A     | 267     | GLY      | -      | linker              | UNP Q61194 |
| A     | 268     | SER      | -      | linker              | UNP Q61194 |
| A     | 269     | GLY      | -      | linker              | UNP Q61194 |
| A     | 270     | SER      | -      | linker              | UNP Q61194 |
| A     | 271     | VAL      | -      | linker              | UNP Q61194 |
| A     | 272     | MET      | -      | linker              | UNP Q61194 |
| A     | 273     | TIIR     | -      | linker              | UNP Q61194 |
| A     | 274     | ARG      | -      | linker              | UNP Q61194 |
| A     | 275     | IIIS     | -      | linker              | UNP Q61194 |
| A     | 276     | SER      | -      | linker              | UNP Q61194 |
| A     | 277     | ALA      | -      | linker              | UNP Q61194 |
| A     | 278     | GLY      | -      | linker              | UNP Q61194 |
| A     | 279     | ALA      | -      | linker              | UNP Q61194 |
| A     | 280     | GLY      | -      | linker              | UNP Q61194 |
| A     | 281     | SER      | -      | linker              | UNP Q61194 |
| A     | 282     | GLY      | -      | linker              | UNP Q61194 |
| A     | 283     | ALA      | -      | linker              | UNP Q61194 |
| A     | 286     | GLY      | ALA    | conflict            | UNP Q61194 |
| A     | 353     | ALA      | PIIE   | engineered mutation | UNP Q61194 |
| A     | 354     | ALA      | PIIE   | engineered mutation | UNP Q61194 |
| A     | 427     | ALA      | LEU    | engineered mutation | UNP Q61194 |

- Molecule 2 is 1,2-ETHANEDIOL (three-letter code: EDO) (formula: C<sub>2</sub>H<sub>6</sub>O<sub>2</sub>).

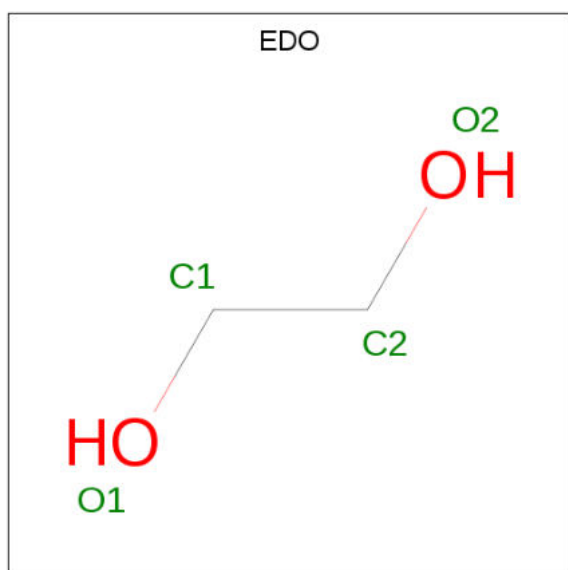

| Mol | Chain | Residues | Atoms |   |   | ZeroOcc | AltConf |
|-----|-------|----------|-------|---|---|---------|---------|
| 2   | A     | 1        | Total | C | O | 0       | 0       |
|     |       |          | 4     | 2 | 2 |         |         |
| 2   | A     | 1        | Total | C | O | 0       | 0       |
|     |       |          | 4     | 2 | 2 |         |         |

- Molecule 3 is SULFATE ION (three-letter code: SO4) (formula: O<sub>4</sub>S).

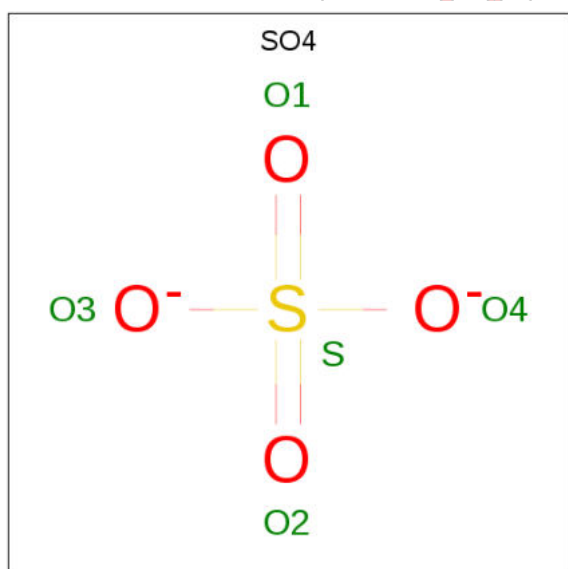

| Mol | Chain | Residues | Atoms |   |   | ZeroOcc | AltConf |
|-----|-------|----------|-------|---|---|---------|---------|
| 3   | A     | 1        | Total | O | S | 0       | 0       |
|     |       |          | 5     | 4 | 1 |         |         |

- Molecule 4 is water.

| Mol | Chain | Residues | Atoms            | ZeroOcc | AltConf |
|-----|-------|----------|------------------|---------|---------|
| 4   | A     | 85       | Total O<br>85 85 | 0       | 0       |

CONFIDENTIAL VALIDATION REPORT

### 3 Residue-property plots

These plots are drawn for all protein, RNA, DNA and oligosaccharide chains in the entry. The first graphic for a chain summarises the proportions of the various outlier classes displayed in the second graphic. The second graphic shows the sequence view annotated by issues in geometry and electron density. Residues are color-coded according to the number of geometric quality criteria for which they contain at least one outlier: green = 0, yellow = 1, orange = 2 and red = 3 or more. A red dot above a residue indicates a poor fit to the electron density ( $RSRZ > 2$ ). Stretches of 2 or more consecutive residues without any outlier are shown as a green connector. Residues present in the sample, but not in the model, are shown in grey.

- Molecule 1: Phosphatidylinositol 4-phosphate 3-kinase C2 domain-containing subunit alpha,Phosphatidylinositol 4-phosphate 3-kinase C2 domain-containing subunit alpha

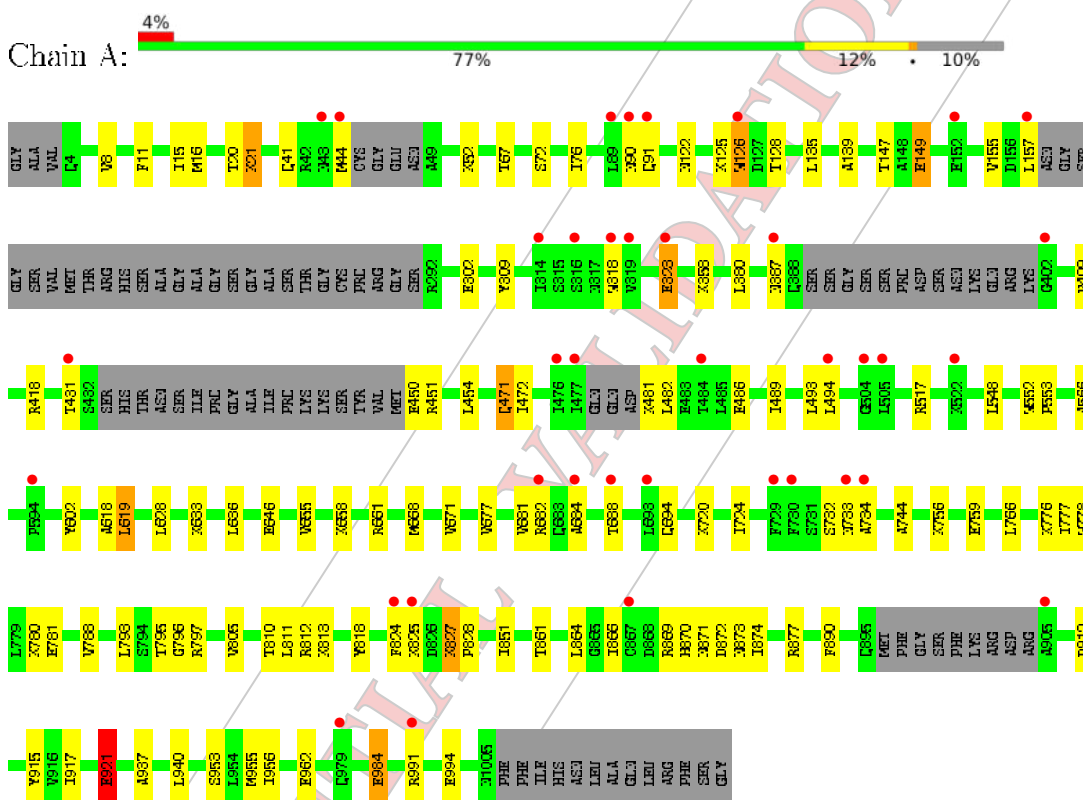

## 4 Data and refinement statistics

| Property                                                                | Value                                                  | Source           |
|-------------------------------------------------------------------------|--------------------------------------------------------|------------------|
| Space group                                                             | P 21 21 21                                             | Depositor        |
| Cell constants<br>a, b, c, $\alpha$ , $\beta$ , $\gamma$                | 135.19Å 151.57Å 56.04Å<br>90.00° 90.00° 90.00°         | Depositor        |
| Resolution (Å)                                                          | 45.06 – 2.42<br>45.06 – 2.42                           | Depositor<br>EDS |
| % Data completeness<br>(in resolution range)                            | 98.7 (45.06-2.42)<br>98.7 (45.06-2.42)                 | Depositor<br>EDS |
| $R_{merge}$                                                             | (Not available)                                        | Depositor        |
| $R_{sym}$                                                               | (Not available)                                        | Depositor        |
| $\langle I/\sigma(I) \rangle$ <sup>1</sup>                              | 1.07 (at 2.42Å)                                        | Xtrriage         |
| Refinement program                                                      | PHENIX 1.18.2_3874                                     | Depositor        |
| $R$ , $R_{free}$                                                        | 0.229 ; 0.277<br>0.230 ; 0.277                         | Depositor<br>DCC |
| $R_{free}$ test set                                                     | 2100 reflections (4.72%)                               | wwPDB-VP         |
| Wilson B-factor (Å <sup>2</sup> )                                       | 61.1                                                   | Xtrriage         |
| Anisotropy                                                              | 0.297                                                  | Xtrriage         |
| Bulk solvent $k_{sol}$ (e/Å <sup>3</sup> ), $B_{sol}$ (Å <sup>2</sup> ) | 0.30 ; 11.1                                            | EDS              |
| L-test for twinning <sup>2</sup>                                        | $\langle  L  \rangle$ 0.50, $\langle L^2 \rangle$ 0.34 | Xtrriage         |
| Estimated twinning fraction                                             | No twinning to report.                                 | Xtrriage         |
| $F_o:F_c$ correlation                                                   | 0.95                                                   | EDS              |
| Total number of atoms                                                   | 6652                                                   | wwPDB-VP         |
| Average B, all atoms (Å <sup>2</sup> )                                  | 71.0                                                   | wwPDB-VP         |

Xtrriage's analysis on translational NCS is as follows: *The largest off-origin peak in the Patterson function is 4.59% of the height of the origin peak. No significant pseudotranslation is detected.*

<sup>1</sup> Intensities estimated from amplitudes.

<sup>2</sup> Theoretical values of  $\langle |L| \rangle$ ,  $\langle L^2 \rangle$  for acentric reflections are 0.5, 0.333 respectively for untwinned datasets, and 0.375, 0.2 for perfectly twinned datasets.

## 5 Model quality

### 5.1 Standard geometry

Bond lengths and bond angles in the following residue types are not validated in this section: SO4, EDO

The Z score for a bond length (or angle) is the number of standard deviations the observed value is removed from the expected value. A bond length (or angle) with  $|Z| > 5$  is considered an outlier worth inspection. RMSZ is the root-mean-square of all Z scores of the bond lengths (or angles).

| Mol | Chain | Bond lengths |               | Bond angles |                |
|-----|-------|--------------|---------------|-------------|----------------|
|     |       | RMSZ         | # Z  >5       | RMSZ        | # Z  >5        |
| 1   | A     | 0.42         | 6/6693 (0.1%) | 0.74        | 14/9057 (0.2%) |

Chiral center outliers are detected by calculating the chiral volume of a chiral center and verifying if the center is modelled as a planar moiety or with the opposite hand. A planarity outlier is detected by checking planarity of atoms in a peptide group, atoms in a mainchain group or atoms of a sidechain that are expected to be planar.

| Mol | Chain | #Chirality outliers | #Planarity outliers |
|-----|-------|---------------------|---------------------|
| 1   | A     | 0                   | 2                   |

All (6) bond length outliers are listed below:

| Mol | Chain | Res | Type | Atoms  | Z     | Observed(Å) | Ideal(Å) |
|-----|-------|-----|------|--------|-------|-------------|----------|
| 1   | A     | 921 | GLU  | CD-OE2 | 6.46  | 1.32        | 1.25     |
| 1   | A     | 302 | GLU  | CD-OE1 | 6.39  | 1.32        | 1.25     |
| 1   | A     | 984 | GLU  | CD-OE2 | 5.56  | 1.31        | 1.25     |
| 1   | A     | 149 | GLU  | CD-OE2 | 5.26  | 1.31        | 1.25     |
| 1   | A     | 21  | LYS  | CE-NZ  | -5.05 | 1.36        | 1.49     |
| 1   | A     | 302 | GLU  | CB-CG  | 5.02  | 1.61        | 1.52     |

All (14) bond angle outliers are listed below:

| Mol | Chain | Res | Type | Atoms      | Z      | Observed(°) | Ideal(°) |
|-----|-------|-----|------|------------|--------|-------------|----------|
| 1   | A     | 921 | GLU  | OE1-CD-OE2 | -21.48 | 97.52       | 123.30   |
| 1   | A     | 984 | GLU  | OE1-CD-OE2 | -20.22 | 99.03       | 123.30   |
| 1   | A     | 921 | GLU  | CG-CD-OE1  | 12.08  | 142.46      | 118.30   |
| 1   | A     | 984 | GLU  | CG-CD-OE1  | 11.13  | 140.56      | 118.30   |
| 1   | A     | 921 | GLU  | CG-CD-OE2  | -8.85  | 100.61      | 118.30   |
| 1   | A     | 984 | GLU  | CG-CD-OE2  | -7.99  | 102.32      | 118.30   |
| 1   | A     | 454 | LEU  | CB-CG-CD2  | -7.92  | 97.53       | 111.00   |

*Continued on next page...*

Continued from previous page...

| Mol | Chain | Res | Type | Atoms     | Z     | Observed(°) | Ideal(°) |
|-----|-------|-----|------|-----------|-------|-------------|----------|
| 1   | A     | 450 | GLU  | N-CA-C    | -7.53 | 90.67       | 111.00   |
| 1   | A     | 619 | LEU  | CB-CG-CD2 | -7.27 | 98.64       | 111.00   |
| 1   | A     | 126 | TRP  | N-CA-CB   | -7.01 | 97.99       | 110.60   |
| 1   | A     | 21  | LYS  | CB-CG-CD  | -6.81 | 93.88       | 111.60   |
| 1   | A     | 323 | GLU  | CA-CB-CG  | 6.57  | 127.86      | 113.40   |
| 1   | A     | 418 | ARG  | CB-CG-CD  | 5.91  | 126.98      | 111.60   |
| 1   | A     | 471 | GLN  | CA-CB-CG  | -5.04 | 102.31      | 113.40   |

There are no chirality outliers.

All (2) planarity outliers are listed below:

| Mol | Chain | Res | Type | Group     |
|-----|-------|-----|------|-----------|
| 1   | A     | 921 | GLU  | Sidechain |
| 1   | A     | 984 | GLU  | Sidechain |

## 5.2 Too-close contacts [i](#)

In the following table, the Non-H and H(model) columns list the number of non-hydrogen atoms and hydrogen atoms in the chain respectively. The H(added) column lists the number of hydrogen atoms added and optimized by MolProbity. The Clashes column lists the number of clashes within the asymmetric unit, whereas Symm-Clashes lists symmetry-related clashes.

| Mol | Chain | Non-H | H(model) | H(added) | Clashes | Symm-Clashes |
|-----|-------|-------|----------|----------|---------|--------------|
| 1   | A     | 6554  | 0        | 6624     | 91      | 0            |
| 2   | A     | 8     | 0        | 12       | 1       | 0            |
| 3   | A     | 5     | 0        | 0        | 0       | 0            |
| 4   | A     | 85    | 0        | 0        | 3       | 0            |
| All | All   | 6652  | 0        | 6636     | 91      | 0            |

The all-atom clashscore is defined as the number of clashes found per 1000 atoms (including hydrogen atoms). The all-atom clashscore for this structure is 7.

All (91) close contacts within the same asymmetric unit are listed below, sorted by their clash magnitude.

| Atom-1            | Atom-2             | Interatomic distance (Å) | Clash overlap (Å) |
|-------------------|--------------------|--------------------------|-------------------|
| 1:A:658:LYS:III2  | 1:A:661:ARG:III21  | 1.36                     | 0.89              |
| 1:A:52:LYS:IID3   | 1:A:67:TIIR:IIG22  | 1.60                     | 0.84              |
| 1:A:619:LEU:IID21 | 1:A:655:VAL:IIG22  | 1.65                     | 0.79              |
| 1:A:126:TRP:IIB3  | 1:A:128:TIIR:IIG23 | 1.68                     | 0.75              |

Continued on next page...

Continued from previous page...

| Atom-1            | Atom-2             | Interatomic distance (Å) | Clash overlap (Å) |
|-------------------|--------------------|--------------------------|-------------------|
| 1:A:812:ARG:IIB2  | 1:A:871:ASN:IIB2   | 1.69                     | 0.75              |
| 1:A:872:ASP:OD2   | 4:A:1201:IIOII:O   | 2.05                     | 0.74              |
| 1:A:16:MET:IIE2   | 1:A:155:VAL:II     | 1.53                     | 0.74              |
| 1:A:471:GLN:OE1   | 1:A:472:ILE:IID12  | 1.90                     | 0.71              |
| 1:A:682:ARG:III22 | 1:A:734:ALA:IIA    | 1.56                     | 0.70              |
| 1:A:471:GLN:IIG3  | 1:A:472:ILE:N      | 2.07                     | 0.68              |
| 1:A:451:ARG:IID2  | 1:A:451:ARG:O      | 1.93                     | 0.68              |
| 1:A:962:GLU:N     | 1:A:962:GLU:OE1    | 2.30                     | 0.64              |
| 1:A:866:ILE:IIG13 | 1:A:869:ARG:IIE    | 1.65                     | 0.62              |
| 1:A:636:LEU:IID22 | 1:A:646:GLU:IIG3   | 1.81                     | 0.61              |
| 1:A:781:GLU:IIG3  | 1:A:940:LEU:IID22  | 1.82                     | 0.60              |
| 1:A:776:LYS:O     | 1:A:780:LYS:IIG3   | 2.02                     | 0.60              |
| 1:A:633:LYS:NZ    | 1:A:796:GLY:IIA2   | 2.18                     | 0.59              |
| 1:A:122:ASN:O     | 1:A:126:TRP:IIB2   | 2.01                     | 0.58              |
| 1:A:720:LYS:IID2  | 1:A:744:ALA:IIA    | 1.85                     | 0.58              |
| 1:A:866:ILE:IID11 | 1:A:869:ARG:III21  | 1.68                     | 0.58              |
| 1:A:126:TRP:N     | 1:A:126:TRP:IIE3   | 2.01                     | 0.58              |
| 1:A:684:ALA:IIB1  | 1:A:688:TIIR:O     | 2.04                     | 0.57              |
| 1:A:486:GLU:OE1   | 1:A:489:ILE:N      | 2.28                     | 0.57              |
| 1:A:861:TIIR:IIA  | 1:A:866:ILE:IIG23  | 1.88                     | 0.55              |
| 1:A:912:ASP:N     | 1:A:912:ASP:OD2    | 2.40                     | 0.55              |
| 1:A:633:LYS:IIE3  | 1:A:668:MET:IIE1   | 1.87                     | 0.55              |
| 1:A:323:GLU:IIG2  | 1:A:387:ASN:IIA    | 1.89                     | 0.55              |
| 1:A:618:ALA:IIB2  | 1:A:628:LEU:IID12  | 1.88                     | 0.54              |
| 1:A:677:VAL:O     | 1:A:681:VAL:IIG23  | 2.07                     | 0.54              |
| 1:A:756:LYS:IID3  | 1:A:759:GLU:OE2    | 2.08                     | 0.54              |
| 1:A:90:ASN:OD1    | 1:A:91:GLN:N       | 2.41                     | 0.54              |
| 1:A:682:ARG:III22 | 1:A:734:ALA:CA     | 2.21                     | 0.53              |
| 1:A:11:PIIE:O     | 1:A:15:ILE:IIG12   | 2.07                     | 0.53              |
| 1:A:126:TRP:CE3   | 1:A:126:TRP:N      | 2.77                     | 0.53              |
| 1:A:323:GLU:IIG2  | 1:A:387:ASN:IIB3   | 1.91                     | 0.53              |
| 1:A:72:SER:IIB3   | 1:A:76:ILE:IID11   | 1.90                     | 0.52              |
| 1:A:812:ARG:NI2   | 4:A:1201:IIOII:O   | 2.43                     | 0.51              |
| 1:A:818:TYR:CD2   | 1:A:828:PRO:IIB3   | 2.45                     | 0.51              |
| 1:A:451:ARG:NI1   | 4:A:1202:IIOII:O   | 2.20                     | 0.51              |
| 1:A:811:LEU:IID13 | 1:A:874:ILE:IIG22  | 1.91                     | 0.50              |
| 1:A:318:TRP:CZ2   | 1:A:431:TIIR:IIG21 | 2.47                     | 0.50              |
| 1:A:805:VAL:IIG13 | 1:A:877:ARG:III11  | 1.77                     | 0.49              |
| 1:A:724:ILE:II    | 1:A:724:ILE:IID12  | 1.77                     | 0.49              |
| 1:A:471:GLN:CG    | 1:A:472:ILE:N      | 2.76                     | 0.49              |
| 1:A:824:PIIE:O    | 1:A:825:LYS:IIB2   | 2.13                     | 0.48              |

Continued on next page...



Continued from previous page...

| Atom-1             | Atom-2             | Interatomic distance (Å) | Clash overlap (Å) |
|--------------------|--------------------|--------------------------|-------------------|
| 1:A:793:LEU:IID23  | 1:A:795:TIIR:IIG22 | 1.94                     | 0.47              |
| 1:A:810:TIIR:IIG23 | 1:A:813:LYS:II     | 1.79                     | 0.47              |
| 1:A:658:LYS:IE2    | 1:A:661:ARG:NI2    | 2.17                     | 0.47              |
| 1:A:125:LYS:IIB3   | 1:A:126:TRP:CE3    | 2.50                     | 0.47              |
| 1:A:471:GLN:IIG3   | 1:A:472:ILE:II     | 1.77                     | 0.47              |
| 1:A:481:LYS:IIB3   | 1:A:482:LEU:IID12  | 1.96                     | 0.46              |
| 1:A:694:GLN:OE1    | 1:A:724:ILE:IIG22  | 2.16                     | 0.46              |
| 1:A:991:ARG:NI1    | 1:A:994:GLU:OE2    | 2.48                     | 0.46              |
| 1:A:323:GLU:IIG2   | 1:A:387:ASN:CB     | 2.45                     | 0.45              |
| 1:A:451:ARG:C      | 1:A:451:ARG:IID2   | 2.36                     | 0.45              |
| 1:A:810:TIIR:IIG22 | 1:A:813:LYS:IE3    | 1.97                     | 0.45              |
| 1:A:864:LEU:IIB3   | 1:A:890:PIIE:IE1   | 1.82                     | 0.45              |
| 1:A:953:SER:IIA    | 1:A:956:ILE:IIG13  | 1.99                     | 0.45              |
| 1:A:493:LEU:IID23  | 1:A:494:LEU:IID12  | 1.98                     | 0.45              |
| 1:A:827:LYS:N      | 1:A:828:PRO:CD     | 2.80                     | 0.45              |
| 1:A:16:MET:O       | 1:A:20:TIIR:IIG23  | 2.17                     | 0.44              |
| 1:A:668:MET:O      | 1:A:671:VAL:IIG22  | 2.17                     | 0.44              |
| 1:A:41:GLN:O       | 1:A:44:MET:IIG2    | 2.18                     | 0.44              |
| 1:A:851:ILE:IIG12  | 1:A:917:ILE:IIG23  | 1.99                     | 0.44              |
| 1:A:309:TYR:CZ     | 1:A:358:LYS:IE3    | 2.52                     | 0.43              |
| 1:A:21:LYS:IIB3    | 1:A:21:LYS:IE2     | 1.52                     | 0.43              |
| 1:A:766:LEU:IID13  | 1:A:955:MET:IIG3   | 1.99                     | 0.43              |
| 1:A:777:ILE:IIA    | 1:A:780:LYS:IE3    | 2.01                     | 0.43              |
| 1:A:805:VAL:IIB    | 2:A:1102:EDO:II11  | 2.01                     | 0.43              |
| 1:A:126:TRP:III2   | 1:A:788:VAL:IIG22  | 1.83                     | 0.43              |
| 1:A:517:ARG:IID2   | 1:A:548:LEU:IID22  | 2.00                     | 0.43              |
| 1:A:824:PIIE:IID2  | 1:A:827:LYS:IIB2   | 1.84                     | 0.43              |
| 1:A:732:SER:OG     | 1:A:733:ASN:N      | 2.51                     | 0.42              |
| 1:A:861:TIIR:IIG23 | 1:A:866:ILE:O      | 2.20                     | 0.42              |
| 1:A:323:GLU:IIG2   | 1:A:387:ASN:CA     | 2.49                     | 0.42              |
| 1:A:915:TYR:IE2    | 1:A:921:GLU:IIG2   | 1.85                     | 0.42              |
| 1:A:869:ARG:IID3   | 1:A:874:ILE:IID11  | 2.01                     | 0.42              |
| 1:A:778:TRP:CE2    | 1:A:937:ALA:IIB1   | 2.54                     | 0.42              |
| 1:A:8:VAL:IIG13    | 1:A:157:LEU:IID12  | 2.02                     | 0.42              |
| 1:A:147:TIIR:IIB   | 1:A:149:GLU:OE1    | 2.20                     | 0.41              |
| 1:A:869:ARG:NI1    | 1:A:873:ASN:IIB3   | 2.35                     | 0.41              |
| 1:A:991:ARG:IIA    | 1:A:991:ARG:IID2   | 1.75                     | 0.41              |
| 1:A:827:LYS:N      | 1:A:828:PRO:IID2   | 2.36                     | 0.41              |
| 1:A:566:ALA:IIB2   | 1:A:602:TYR:CZ     | 2.55                     | 0.41              |
| 1:A:870:IIIS:IID2  | 1:A:872:ASP:II     | 1.69                     | 0.41              |
| 1:A:41:GLN:IIB3    | 1:A:44:MET:CE      | 2.51                     | 0.41              |

Continued on next page...

Continued from previous page...

| Atom-1            | Atom-2            | Interatomic distance (Å) | Clash overlap (Å) |
|-------------------|-------------------|--------------------------|-------------------|
| 1:A:810:TIIR:CG2  | 1:A:813:LYS:IIB2  | 2.51                     | 0.41              |
| 1:A:552:TRP:IIA   | 1:A:553:PRO:IID3  | 1.95                     | 0.40              |
| 1:A:940:LEU:IIA   | 1:A:940:LEU:IID23 | 1.89                     | 0.40              |
| 1:A:380:LEU:IIB2  | 1:A:409:VAL:IIG22 | 2.02                     | 0.40              |
| 1:A:135:LEU:IID12 | 1:A:139:ALA:IIB3  | 2.04                     | 0.40              |

There are no symmetry-related clashes.

## 5.3 Torsion angles [i](#)

### 5.3.1 Protein backbone [i](#)

In the following table, the Percentiles column shows the percent Ramachandran outliers of the chain as a percentile score with respect to all X-ray entries followed by that with respect to entries of similar resolution.

The Analysed column shows the number of residues for which the backbone conformation was analysed, and the total number of residues.

| Mol | Chain | Analysed      | Favoured  | Allowed | Outliers | Percentiles |
|-----|-------|---------------|-----------|---------|----------|-------------|
| 1   | A     | 810/910 (89%) | 784 (97%) | 25 (3%) | 1 (0%)   | 51   67     |

All (1) Ramachandran outliers are listed below:

| Mol | Chain | Res | Type |
|-----|-------|-----|------|
| 1   | A     | 827 | LYS  |

### 5.3.2 Protein sidechains [i](#)

In the following table, the Percentiles column shows the percent sidechain outliers of the chain as a percentile score with respect to all X-ray entries followed by that with respect to entries of similar resolution.

The Analysed column shows the number of residues for which the sidechain conformation was analysed, and the total number of residues.

| Mol | Chain | Analysed      | Rotameric  | Outliers | Percentiles |
|-----|-------|---------------|------------|----------|-------------|
| 1   | A     | 732/800 (92%) | 731 (100%) | 1 (0%)   | 93   98     |

All (1) residues with a non-rotameric sidechain are listed below:

| Mol | Chain | Res | Type |
|-----|-------|-----|------|
| 1   | A     | 797 | ARG  |

Sometimes sidechains can be flipped to improve hydrogen bonding and reduce clashes. All (5) such sidechains are listed below:

| Mol | Chain | Res | Type |
|-----|-------|-----|------|
| 1   | A     | 571 | GLN  |
| 1   | A     | 672 | GLN  |
| 1   | A     | 683 | GLN  |
| 1   | A     | 870 | IIS  |
| 1   | A     | 873 | ASN  |

### 5.3.3 RNA [i](#)

There are no RNA molecules in this entry.

### 5.4 Non-standard residues in protein, DNA, RNA chains [i](#)

There are no non-standard protein/DNA/RNA residues in this entry.

### 5.5 Carbohydrates [i](#)

There are no monosaccharides in this entry.

### 5.6 Ligand geometry [i](#)

3 ligands are modelled in this entry.

In the following table, the Counts columns list the number of bonds (or angles) for which Mogul statistics could be retrieved, the number of bonds (or angles) that are observed in the model and the number of bonds (or angles) that are defined in the Chemical Component Dictionary. The Link column lists molecule types, if any, to which the group is linked. The Z score for a bond length (or angle) is the number of standard deviations the observed value is removed from the expected value. A bond length (or angle) with  $|Z| > 2$  is considered an outlier worth inspection. RMSZ is the root-mean-square of all Z scores of the bond lengths (or angles).

| Mol | Type | Chain | Res  | Link | Bond lengths |      |             | Bond angles |      |             |
|-----|------|-------|------|------|--------------|------|-------------|-------------|------|-------------|
|     |      |       |      |      | Counts       | RMSZ | $\# Z  > 2$ | Counts      | RMSZ | $\# Z  > 2$ |
| 2   | EDO  | A     | 1102 | -    | 3,3,3        | 0.44 | 0           | 2,2,2       | 0.29 | 0           |
| 2   | EDO  | A     | 1101 | -    | 3,3,3        | 0.43 | 0           | 2,2,2       | 0.37 | 0           |
| 3   | SO4  | A     | 1103 | -    | 4,4,4        | 0.13 | 0           | 6,6,6       | 0.05 | 0           |

In the following table, the Chirals column lists the number of chiral outliers, the number of chiral centers analysed, the number of these observed in the model and the number defined in the Chemical Component Dictionary. Similar counts are reported in the Torsion and Rings columns. '-' means no outliers of that kind were identified.

| Mol | Type | Chain | Res  | Link | Chirals | Torsions | Rings |
|-----|------|-------|------|------|---------|----------|-------|
| 2   | EDO  | A     | 1102 | -    | -       | 0/1/1/1  | -     |
| 2   | EDO  | A     | 1101 | -    | -       | 0/1/1/1  | -     |

There are no bond length outliers.

There are no bond angle outliers.

There are no chirality outliers.

There are no torsion outliers.

There are no ring outliers.

1 monomer is involved in 1 short contact:

| Mol | Chain | Res  | Type | Clashes | Symm-Clashes |
|-----|-------|------|------|---------|--------------|
| 2   | A     | 1102 | EDO  | 1       | 0            |

## 5.7 Other polymers [i](#)

There are no such residues in this entry.

## 5.8 Polymer linkage issues [i](#)

There are no chain breaks in this entry.

## 6 Fit of model and data [i](#)

### 6.1 Protein, DNA and RNA chains [i](#)

In the following table, the column labelled '#RSRZ > 2' contains the number (and percentage) of RSRZ outliers, followed by percent RSRZ outliers for the chain as percentile scores relative to all X-ray entries and entries of similar resolution. The OWAB column contains the minimum, median, 95<sup>th</sup> percentile and maximum values of the occupancy-weighted average B-factor per residue. The column labelled 'Q < 0.9' lists the number of (and percentage) of residues with an average occupancy less than 0.9.

| Mol | Chain | Analysed      | <RSRZ> | #RSRZ > 2     | OWAB(Å <sup>2</sup> ) | Q < 0.9 |
|-----|-------|---------------|--------|---------------|-----------------------|---------|
| 1   | A     | 822/910 (90%) | 0.28   | 38 (4%) 32 30 | 39, 66, 112, 148      | 0       |

All (38) RSRZ outliers are listed below:

| Mol | Chain | Res | Type | RSRZ |
|-----|-------|-----|------|------|
| 1   | A     | 402 | GLY  | 5.2  |
| 1   | A     | 476 | ILE  | 4.8  |
| 1   | A     | 44  | MET  | 4.2  |
| 1   | A     | 733 | ASN  | 3.5  |
| 1   | A     | 905 | ALA  | 3.5  |
| 1   | A     | 90  | ASN  | 3.3  |
| 1   | A     | 682 | ARG  | 3.3  |
| 1   | A     | 484 | TIIR | 3.1  |
| 1   | A     | 693 | LEU  | 3.0  |
| 1   | A     | 734 | ALA  | 3.0  |
| 1   | A     | 91  | GLN  | 3.0  |
| 1   | A     | 477 | ILE  | 2.9  |
| 1   | A     | 323 | GLU  | 2.8  |
| 1   | A     | 729 | PIIE | 2.7  |
| 1   | A     | 979 | GLN  | 2.7  |
| 1   | A     | 684 | ALA  | 2.7  |
| 1   | A     | 314 | ILE  | 2.6  |
| 1   | A     | 867 | CYS  | 2.6  |
| 1   | A     | 522 | LYS  | 2.5  |
| 1   | A     | 89  | LEU  | 2.5  |
| 1   | A     | 825 | LYS  | 2.5  |
| 1   | A     | 43  | ASN  | 2.5  |
| 1   | A     | 387 | ASN  | 2.5  |
| 1   | A     | 152 | GLU  | 2.4  |
| 1   | A     | 494 | LEU  | 2.4  |
| 1   | A     | 688 | TIIR | 2.3  |
| 1   | A     | 824 | PIIE | 2.2  |

*Continued on next page...*

Continued from previous page...

| Mol | Chain | Res | Type | RSRZ |
|-----|-------|-----|------|------|
| 1   | A     | 318 | TRP  | 2.2  |
| 1   | A     | 316 | SER  | 2.2  |
| 1   | A     | 594 | PRO  | 2.2  |
| 1   | A     | 504 | GLY  | 2.1  |
| 1   | A     | 431 | TIIR | 2.1  |
| 1   | A     | 991 | ARG  | 2.1  |
| 1   | A     | 319 | VAL  | 2.1  |
| 1   | A     | 126 | TRP  | 2.1  |
| 1   | A     | 730 | PIIE | 2.1  |
| 1   | A     | 505 | LEU  | 2.0  |
| 1   | A     | 157 | LEU  | 2.0  |

## 6.2 Non-standard residues in protein, DNA, RNA chains [i](#)

There are no non-standard protein/DNA/RNA residues in this entry.

## 6.3 Carbohydrates [i](#)

There are no monosaccharides in this entry.

## 6.4 Ligands [i](#)

In the following table, the Atoms column lists the number of modelled atoms in the group and the number defined in the chemical component dictionary. The B-factors column lists the minimum, median, 95<sup>th</sup> percentile and maximum values of B factors of atoms in the group. The column labelled 'Q<0.9' lists the number of atoms with occupancy less than 0.9.

| Mol | Type | Chain | Res  | Atoms | RSCC | RSR  | B-factors(Å <sup>2</sup> ) | Q<0.9 |
|-----|------|-------|------|-------|------|------|----------------------------|-------|
| 2   | EDO  | A     | 1101 | 4/4   | 0.83 | 0.37 | 68,70,77,82                | 0     |
| 3   | SO4  | A     | 1103 | 5/5   | 0.86 | 0.32 | 117,118,126,128            | 0     |
| 2   | EDO  | A     | 1102 | 4/4   | 0.88 | 0.46 | 95,96,105,111              | 0     |

## 6.5 Other polymers [i](#)

There are no such residues in this entry.



## Full wwPDB X-ray Structure Validation Report ⓘ

Jan 14, 2021 – 05:36 PM GMT

PDB ID : 7BI6  
Title : PI3KC2a core in complex with ATP  
Deposited on : 2021-01-12  
Resolution : 2.75 Å (reported)

This is a Full wwPDB X-ray Structure Validation Report.

This report is produced by the wwPDB biocuration pipeline after annotation of the structure.

We welcome your comments at [validation@mail.wwpdb.org](mailto:validation@mail.wwpdb.org)

A user guide is available at

<https://www.wwpdb.org/validation/2017/XrayValidationReportHelp>

with specific help available everywhere you see the ⓘ symbol.

---

The following versions of software and data (see [references ⓘ](#)) were used in the production of this report:

MolProbity : 4.02b-467  
Mogul : 1.8.5 (274361), CSD as541be (2020)  
Xtriage (Phenix) : 1.13  
EDS : 2.16  
buster-report : 1.1.7 (2018)  
Percentile statistics : 20191225.v01 (using entries in the PDB archive December 25th 2019)  
Refmac : 5.8.0158  
CCP4 : 7.0.044 (Gargrove)  
Ideal geometry (proteins) : Engh & Huber (2001)  
Ideal geometry (DNA, RNA) : Parkinson et al. (1996)  
Validation Pipeline (wwPDB-VP) : 2.16

## 1 Overall quality at a glance i

The following experimental techniques were used to determine the structure:  
*X-RAY DIFFRACTION*

The reported resolution of this entry is 2.75 Å.

Percentile scores (ranging between 0-100) for global validation metrics of the entry are shown in the following graphic. The table shows the number of entries on which the scores are based.

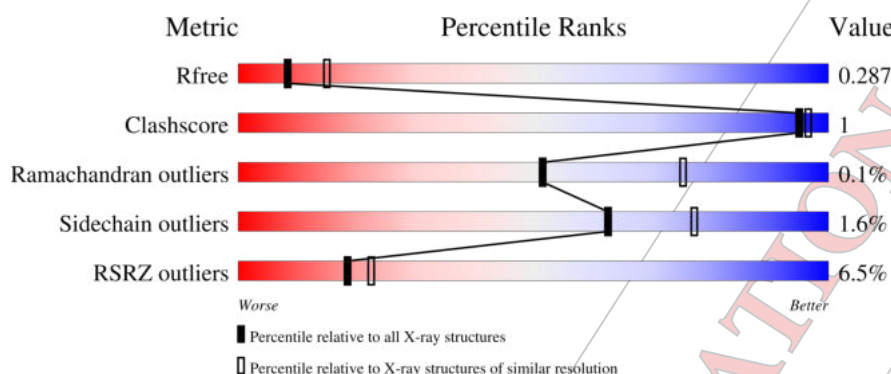

| Metric                | Whole archive<br>(#Entries) | Similar resolution<br>(#Entries, resolution range(Å)) |
|-----------------------|-----------------------------|-------------------------------------------------------|
| $R_{free}$            | 130704                      | 1235 (2.78-2.74)                                      |
| Clashscore            | 141614                      | 1277 (2.78-2.74)                                      |
| Ramachandran outliers | 138981                      | 1257 (2.78-2.74)                                      |
| Sidechain outliers    | 138945                      | 1257 (2.78-2.74)                                      |
| RSRZ outliers         | 127900                      | 1207 (2.78-2.74)                                      |

The table below summarises the geometric issues observed across the polymeric chains and their fit to the electron density. The red, orange, yellow and green segments of the lower bar indicate the fraction of residues that contain outliers for  $\geq 3$ , 2, 1 and 0 types of geometric quality criteria respectively. A grey segment represents the fraction of residues that are not modelled. The numeric value for each fraction is indicated below the corresponding segment, with a dot representing fractions  $\leq 5\%$ . The upper red bar (where present) indicates the fraction of residues that have poor fit to the electron density. The numeric value is given above the bar.

| Mol | Chain | Length | Quality of chain |
|-----|-------|--------|------------------|
| 1   | A     | 910    |                  |

The following table lists non-polymeric compounds, carbohydrate monomers and non-standard residues in protein, DNA, RNA chains that are outliers for geometric or electron-density-fit criteria:

| Mol | Type | Chain | Res  | Chirality | Geometry | Clashes | Electron density |
|-----|------|-------|------|-----------|----------|---------|------------------|
| 4   | EDO  | A     | 1105 | -         | -        | -       | X                |



## 2 Entry composition

There are 6 unique types of molecules in this entry. The entry contains 6747 atoms, of which 0 are hydrogens and 0 are deuteriums.

In the tables below, the ZeroOcc column contains the number of atoms modelled with zero occupancy, the AltConf column contains the number of residues with at least one atom in alternate conformation and the Trace column contains the number of residues modelled with at most 2 atoms.

- Molecule 1 is a protein called Phosphatidylinositol 4-phosphate 3-kinase C2 domain-containing subunit alpha, Phosphatidylinositol 4-phosphate 3-kinase C2 domain-containing subunit alpha.

| Mol | Chain | Residues | Atoms |      |      |      |    | ZeroOcc | AltConf | Trace |
|-----|-------|----------|-------|------|------|------|----|---------|---------|-------|
|     |       |          | Total | C    | N    | O    | S  |         |         |       |
| 1   | A     | 829      | 6611  | 4244 | 1109 | 1217 | 41 | 0       | 5       | 0     |

There are 23 discrepancies between the modelled and reference sequences:

| Chain | Residue | Modelled | Actual | Comment             | Reference  |
|-------|---------|----------|--------|---------------------|------------|
| A     | 1       | GLY      | -      | expression tag      | UNP Q61194 |
| A     | 2       | ALA      | -      | expression tag      | UNP Q61194 |
| A     | 159     | GLY      | -      | linker              | UNP Q61194 |
| A     | 268     | SER      | -      | linker              | UNP Q61194 |
| A     | 269     | GLY      | -      | linker              | UNP Q61194 |
| A     | 270     | SER      | -      | linker              | UNP Q61194 |
| A     | 271     | VAL      | -      | linker              | UNP Q61194 |
| A     | 272     | MET      | -      | linker              | UNP Q61194 |
| A     | 273     | TIIR     | -      | linker              | UNP Q61194 |
| A     | 274     | ARG      | -      | linker              | UNP Q61194 |
| A     | 275     | IIIS     | -      | linker              | UNP Q61194 |
| A     | 276     | SER      | -      | linker              | UNP Q61194 |
| A     | 277     | ALA      | -      | linker              | UNP Q61194 |
| A     | 278     | GLY      | -      | linker              | UNP Q61194 |
| A     | 279     | ALA      | -      | linker              | UNP Q61194 |
| A     | 280     | GLY      | -      | linker              | UNP Q61194 |
| A     | 281     | SER      | -      | linker              | UNP Q61194 |
| A     | 282     | GLY      | -      | linker              | UNP Q61194 |
| A     | 283     | ALA      | -      | linker              | UNP Q61194 |
| A     | 286     | GLY      | ALA    | conflict            | UNP Q61194 |
| A     | 353     | ALA      | PIIE   | engineered mutation | UNP Q61194 |
| A     | 354     | ALA      | PIIE   | engineered mutation | UNP Q61194 |
| A     | 427     | ALA      | LEU    | engineered mutation | UNP Q61194 |

- Molecule 2 is ADENOSINE-5'-TRIPHOSPHATE (three-letter code: ATP) (formula:

C<sub>10</sub>H<sub>16</sub>N<sub>5</sub>O<sub>13</sub>P<sub>3</sub>).

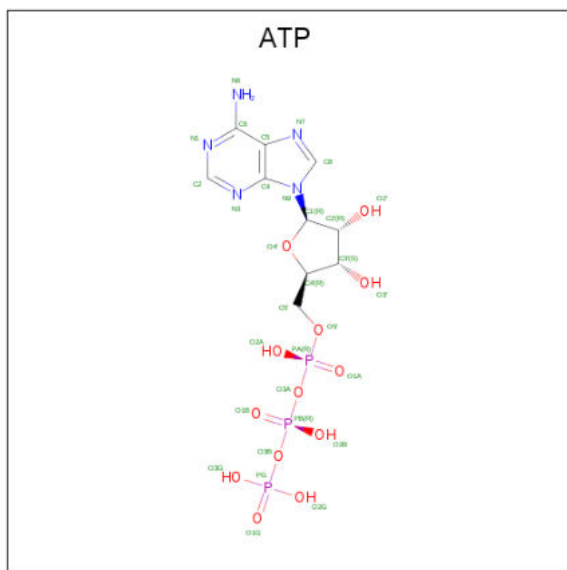

| Mol | Chain | Residues | Atoms |    |   |    | ZeroOcc | AltConf |   |
|-----|-------|----------|-------|----|---|----|---------|---------|---|
|     |       |          | Total | C  | N | O  |         |         | P |
| 2   | A     | 1        | 31    | 10 | 5 | 13 | 3       | 0       | 0 |

- Molecule 3 is SULFATE ION (three-letter code: SO4) (formula: O<sub>4</sub>S).

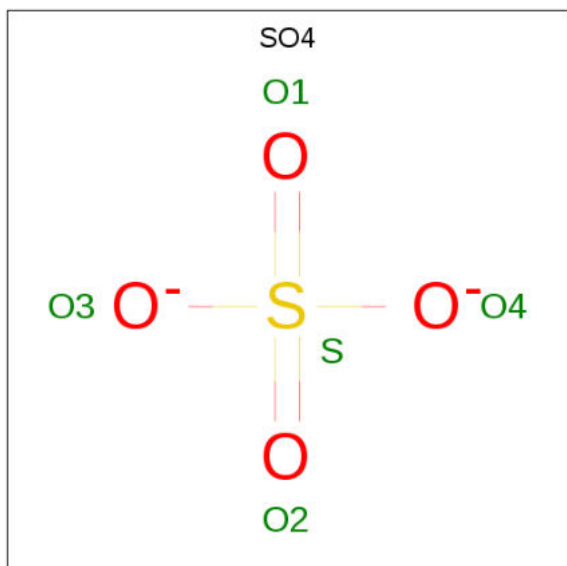

| Mol | Chain | Residues | Atoms |     | ZeroOcc | AltConf |
|-----|-------|----------|-------|-----|---------|---------|
|     |       |          | Total | O S |         |         |
| 3   | A     | 1        | 5     | 4 1 | 0       | 0       |
| 3   | A     | 1        | 5     | 4 1 | 0       | 0       |

- Molecule 4 is 1,2-ETHANEDIOL (three-letter code: EDO) (formula:  $C_2H_6O_2$ ).

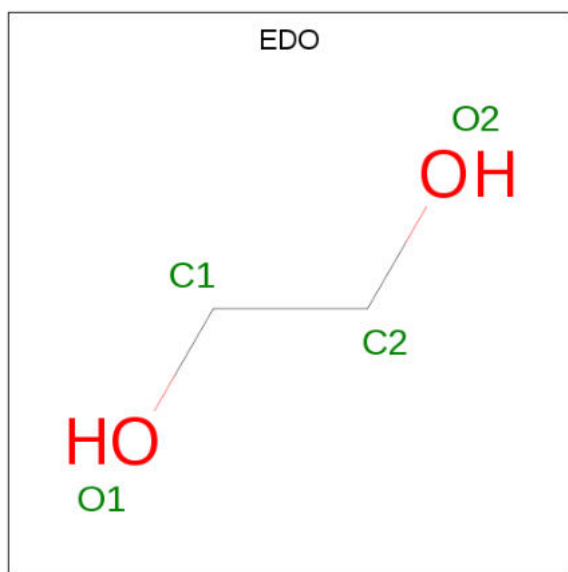

| Mol | Chain | Residues | Atoms |     | ZeroOcc | AltConf |
|-----|-------|----------|-------|-----|---------|---------|
| 4   | A     | 1        | Total | C O | 0       | 0       |
|     |       |          | 4     | 2 2 |         |         |
| 4   | A     | 1        | Total | C O | 0       | 0       |
|     |       |          | 4     | 2 2 |         |         |

- Molecule 5 is MAGNESIUM ION (three-letter code: MG) (formula: Mg).

| Mol | Chain | Residues | Atoms |    | ZeroOcc | AltConf |
|-----|-------|----------|-------|----|---------|---------|
| 5   | A     | 1        | Total | Mg | 0       | 0       |
|     |       |          | 1     | 1  |         |         |

- Molecule 6 is water.

| Mol | Chain | Residues | Atoms |    | ZeroOcc | AltConf |
|-----|-------|----------|-------|----|---------|---------|
| 6   | A     | 86       | Total | O  | 0       | 0       |
|     |       |          | 86    | 86 |         |         |



## 4 Data and refinement statistics

| Property                                                                | Value                                                  | Source           |
|-------------------------------------------------------------------------|--------------------------------------------------------|------------------|
| Space group                                                             | P 21 21 21                                             | Depositor        |
| Cell constants<br>a, b, c, $\alpha$ , $\beta$ , $\gamma$                | 56.12Å 133.37Å 152.71Å<br>90.00° 90.00° 90.00°         | Depositor        |
| Resolution (Å)                                                          | 47.56 – 2.75<br>47.56 – 2.75                           | Depositor<br>EDS |
| % Data completeness<br>(in resolution range)                            | 98.8 (47.56-2.75)<br>98.9 (47.56-2.75)                 | Depositor<br>EDS |
| $R_{merge}$                                                             | (Not available)                                        | Depositor        |
| $R_{sym}$                                                               | (Not available)                                        | Depositor        |
| $\langle I/\sigma(I) \rangle$ <sup>1</sup>                              | 1.06 (at 2.73Å)                                        | Xtrriage         |
| Refinement program                                                      | REFMAC 5.8.0258                                        | Depositor        |
| $R$ , $R_{free}$                                                        | 0.244 ; 0.289<br>0.245 ; 0.287                         | Depositor<br>DCC |
| $R_{free}$ test set                                                     | 1521 reflections (5.00%)                               | wwPDB-VP         |
| Wilson B-factor (Å <sup>2</sup> )                                       | 68.7                                                   | Xtrriage         |
| Anisotropy                                                              | 0.429                                                  | Xtrriage         |
| Bulk solvent $k_{sol}$ (e/Å <sup>3</sup> ), $B_{sol}$ (Å <sup>2</sup> ) | 0.30 ; 36.0                                            | EDS              |
| L-test for twinning <sup>2</sup>                                        | $\langle  L  \rangle$ 0.49, $\langle L^2 \rangle$ 0.33 | Xtrriage         |
| Estimated twinning fraction                                             | No twinning to report.                                 | Xtrriage         |
| $F_o:F_c$ correlation                                                   | 0.93                                                   | EDS              |
| Total number of atoms                                                   | 6747                                                   | wwPDB-VP         |
| Average B, all atoms (Å <sup>2</sup> )                                  | 79.0                                                   | wwPDB-VP         |

Xtrriage's analysis on translational NCS is as follows: *The largest off-origin peak in the Patterson function is 4.55% of the height of the origin peak. No significant pseudotranslation is detected.*

<sup>1</sup> Intensities estimated from amplitudes.

<sup>2</sup> Theoretical values of  $\langle |L| \rangle$ ,  $\langle L^2 \rangle$  for acentric reflections are 0.5, 0.333 respectively for untwinned datasets, and 0.375, 0.2 for perfectly twinned datasets.

## 5 Model quality

### 5.1 Standard geometry

Bond lengths and bond angles in the following residue types are not validated in this section: MG, SO4, ATP, EDO

The Z score for a bond length (or angle) is the number of standard deviations the observed value is removed from the expected value. A bond length (or angle) with  $|Z| > 5$  is considered an outlier worth inspection. RMSZ is the root-mean-square of all Z scores of the bond lengths (or angles).

| Mol | Chain | Bond lengths |         | Bond angles |         |
|-----|-------|--------------|---------|-------------|---------|
|     |       | RMSZ         | # Z  >5 | RMSZ        | # Z  >5 |
| 1   | A     | 0.66         | 0/6760  | 0.70        | 0/9149  |

There are no bond length outliers.

There are no bond angle outliers.

There are no chirality outliers.

There are no planarity outliers.

### 5.2 Too-close contacts

In the following table, the Non-H and H(model) columns list the number of non-hydrogen atoms and hydrogen atoms in the chain respectively. The H(added) column lists the number of hydrogen atoms added and optimized by MolProbity. The Clashes column lists the number of clashes within the asymmetric unit, whereas Symm-Clashes lists symmetry-related clashes.

| Mol | Chain | Non-H | H(model) | H(added) | Clashes | Symm-Clashes |
|-----|-------|-------|----------|----------|---------|--------------|
| 1   | A     | 6611  | 0        | 6672     | 16      | 0            |
| 2   | A     | 31    | 0        | 12       | 0       | 0            |
| 3   | A     | 10    | 0        | 0        | 0       | 0            |
| 4   | A     | 8     | 0        | 12       | 0       | 0            |
| 5   | A     | 1     | 0        | 0        | 0       | 0            |
| 6   | A     | 86    | 0        | 0        | 0       | 0            |
| All | All   | 6747  | 0        | 6696     | 16      | 0            |

The all-atom clashscore is defined as the number of clashes found per 1000 atoms (including hydrogen atoms). The all-atom clashscore for this structure is 1.

All (16) close contacts within the same asymmetric unit are listed below, sorted by their clash magnitude.

| Atom-1             | Atom-2            | Interatomic distance (Å) | Clash overlap (Å) |
|--------------------|-------------------|--------------------------|-------------------|
| 1:A:514:TRP:O      | 1:A:517:ARG:NE    | 2.35                     | 0.59              |
| 1:A:72:SER:IIB2    | 1:A:76:ILE:IID11  | 1.87                     | 0.57              |
| 1:A:871:ASN:IID22  | 1:A:872:ASP:N     | 2.08                     | 0.52              |
| 1:A:956:ILE:N      | 1:A:957:PRO:IID2  | 2.27                     | 0.49              |
| 1:A:409:VAL:IIG23  | 1:A:429:LEU:IIB3  | 1.94                     | 0.49              |
| 1:A:125:LYS:IID3   | 1:A:786:ARG:IIA   | 1.95                     | 0.48              |
| 1:A:827:LYS:N      | 1:A:828:PRO:CD    | 2.77                     | 0.47              |
| 1:A:307:TIIR:IIG23 | 1:A:457:ASP:IIB2  | 1.98                     | 0.45              |
| 1:A:11:PIIE:O      | 1:A:15:ILE:IIG12  | 2.18                     | 0.44              |
| 1:A:593:LEU:N      | 1:A:594:PRO:CD    | 2.81                     | 0.44              |
| 1:A:79:MET:IIA     | 1:A:82:LEU:IIB2   | 2.01                     | 0.43              |
| 1:A:688:TIIR:IIG22 | 1:A:692:VAL:IIG23 | 2.01                     | 0.43              |
| 1:A:697:MET:III1   | 1:A:700:VAL:IIG21 | 2.01                     | 0.42              |
| 1:A:619:LEU:IID21  | 1:A:655:VAL:IIG22 | 2.01                     | 0.42              |
| 1:A:733:ASN:O      | 1:A:734:ALA:IIB3  | 2.19                     | 0.41              |
| 1:A:869:ARG:NIH1   | 1:A:873:ASN:IIB3  | 2.35                     | 0.40              |

There are no symmetry-related clashes.

## 5.3 Torsion angles [i](#)

### 5.3.1 Protein backbone [i](#)

In the following table, the Percentiles column shows the percent Ramachandran outliers of the chain as a percentile score with respect to all X-ray entries followed by that with respect to entries of similar resolution.

The Analysed column shows the number of residues for which the backbone conformation was analysed, and the total number of residues.

| Mol | Chain | Analysed      | Favoured  | Allowed | Outliers | Percentiles |
|-----|-------|---------------|-----------|---------|----------|-------------|
| 1   | A     | 820/910 (90%) | 775 (94%) | 44 (5%) | 1 (0%)   | 51   75     |

All (1) Ramachandran outliers are listed below:

| Mol | Chain | Res | Type |
|-----|-------|-----|------|
| 1   | A     | 308 | VAL  |

### 5.3.2 Protein sidechains [i](#)

In the following table, the Percentiles column shows the percent sidechain outliers of the chain as a percentile score with respect to all X-ray entries followed by that with respect to entries of similar resolution.

The Analysed column shows the number of residues for which the sidechain conformation was analysed, and the total number of residues.

| Mol | Chain | Analysed      | Rotameric | Outliers | Percentiles |
|-----|-------|---------------|-----------|----------|-------------|
| 1   | A     | 738/800 (92%) | 726 (98%) | 12 (2%)  | 62 77       |

All (12) residues with a non-rotameric sidechain are listed below:

| Mol | Chain | Res | Type |
|-----|-------|-----|------|
| 1   | A     | 43  | ASN  |
| 1   | A     | 89  | LEU  |
| 1   | A     | 351 | LYS  |
| 1   | A     | 475 | ASN  |
| 1   | A     | 521 | LEU  |
| 1   | A     | 669 | LYS  |
| 1   | A     | 825 | LYS  |
| 1   | A     | 845 | LYS  |
| 1   | A     | 869 | ARG  |
| 1   | A     | 871 | ASN  |
| 1   | A     | 889 | LYS  |
| 1   | A     | 982 | ASP  |

Sometimes sidechains can be flipped to improve hydrogen bonding and reduce clashes. All (5) such sidechains are listed below:

| Mol | Chain | Res | Type |
|-----|-------|-----|------|
| 1   | A     | 43  | ASN  |
| 1   | A     | 80  | GLN  |
| 1   | A     | 475 | ASN  |
| 1   | A     | 667 | GLN  |
| 1   | A     | 871 | ASN  |

### 5.3.3 RNA [i](#)

There are no RNA molecules in this entry.



## 5.4 Non-standard residues in protein, DNA, RNA chains [i](#)

There are no non-standard protein/DNA/RNA residues in this entry.

## 5.5 Carbohydrates [i](#)

There are no monosaccharides in this entry.

## 5.6 Ligand geometry [i](#)

Of 6 ligands modelled in this entry, 1 is monoatomic - leaving 5 for Mogul analysis.

In the following table, the Counts columns list the number of bonds (or angles) for which Mogul statistics could be retrieved, the number of bonds (or angles) that are observed in the model and the number of bonds (or angles) that are defined in the Chemical Component Dictionary. The Link column lists molecule types, if any, to which the group is linked. The Z score for a bond length (or angle) is the number of standard deviations the observed value is removed from the expected value. A bond length (or angle) with  $|Z| > 2$  is considered an outlier worth inspection. RMSZ is the root-mean-square of all Z scores of the bond lengths (or angles).

| Mol | Type | Chain | Res  | Link | Bond lengths |      |          | Bond angles |      |          |
|-----|------|-------|------|------|--------------|------|----------|-------------|------|----------|
|     |      |       |      |      | Counts       | RMSZ | # Z  > 2 | Counts      | RMSZ | # Z  > 2 |
| 3   | SO4  | A     | 1103 | -    | 4,4,4        | 0.39 | 0        | 6,6,6       | 0.05 | 0        |
| 2   | ATP  | A     | 1101 | 5    | 26,33,33     | 0.65 | 0        | 31,52,52    | 0.74 | 1 (3%)   |
| 4   | EDO  | A     | 1105 | -    | 3,3,3        | 0.05 | 0        | 2,2,2       | 0.25 | 0        |
| 3   | SO4  | A     | 1102 | -    | 4,4,4        | 0.39 | 0        | 6,6,6       | 0.05 | 0        |
| 4   | EDO  | A     | 1104 | -    | 3,3,3        | 0.06 | 0        | 2,2,2       | 0.19 | 0        |

In the following table, the Chirals column lists the number of chiral outliers, the number of chiral centers analysed, the number of these observed in the model and the number defined in the Chemical Component Dictionary. Similar counts are reported in the Torsion and Rings columns. - means no outliers of that kind were identified.

| Mol | Type | Chain | Res  | Link | Chirals | Torsions   | Rings   |
|-----|------|-------|------|------|---------|------------|---------|
| 2   | ATP  | A     | 1101 | 5    | -       | 0/18/38/38 | 0/3/3/3 |
| 4   | EDO  | A     | 1105 | -    | -       | 1/1/1/1    | -       |
| 4   | EDO  | A     | 1104 | -    | -       | 0/1/1/1    | -       |

There are no bond length outliers.

All (1) bond angle outliers are listed below:

| Mol | Chain | Res  | Type | Atoms    | Z    | Observed(°) | Ideal(°) |
|-----|-------|------|------|----------|------|-------------|----------|
| 2   | A     | 1101 | ATP  | C5-C6-N6 | 2.29 | 123.83      | 120.35   |

There are no chirality outliers.

All (1) torsion outliers are listed below:

| Mol | Chain | Res  | Type | Atoms       |
|-----|-------|------|------|-------------|
| 4   | A     | 1105 | EDO  | O1-C1-C2-O2 |

There are no ring outliers.

No monomer is involved in short contacts.

The following is a two-dimensional graphical depiction of Mogul quality analysis of bond lengths, bond angles, torsion angles, and ring geometry for all instances of the Ligand of Interest. In addition, ligands with molecular weight > 250 and outliers as shown on the validation Tables will also be included. For torsion angles, if less than 5% of the Mogul distribution of torsion angles is within 10 degrees of the torsion angle in question, then that torsion angle is considered an outlier. Any bond that is central to one or more torsion angles identified as an outlier by Mogul will be highlighted in the graph. For rings, the root-mean-square deviation (RMSD) between the ring in question and similar rings identified by Mogul is calculated over all ring torsion angles. If the average RMSD is greater than 60 degrees and the minimal RMSD between the ring in question and any Mogul-identified rings is also greater than 60 degrees, then that ring is considered an outlier. The outliers are highlighted in purple. The color gray indicates Mogul did not find sufficient equivalents in the CSD to analyse the geometry.

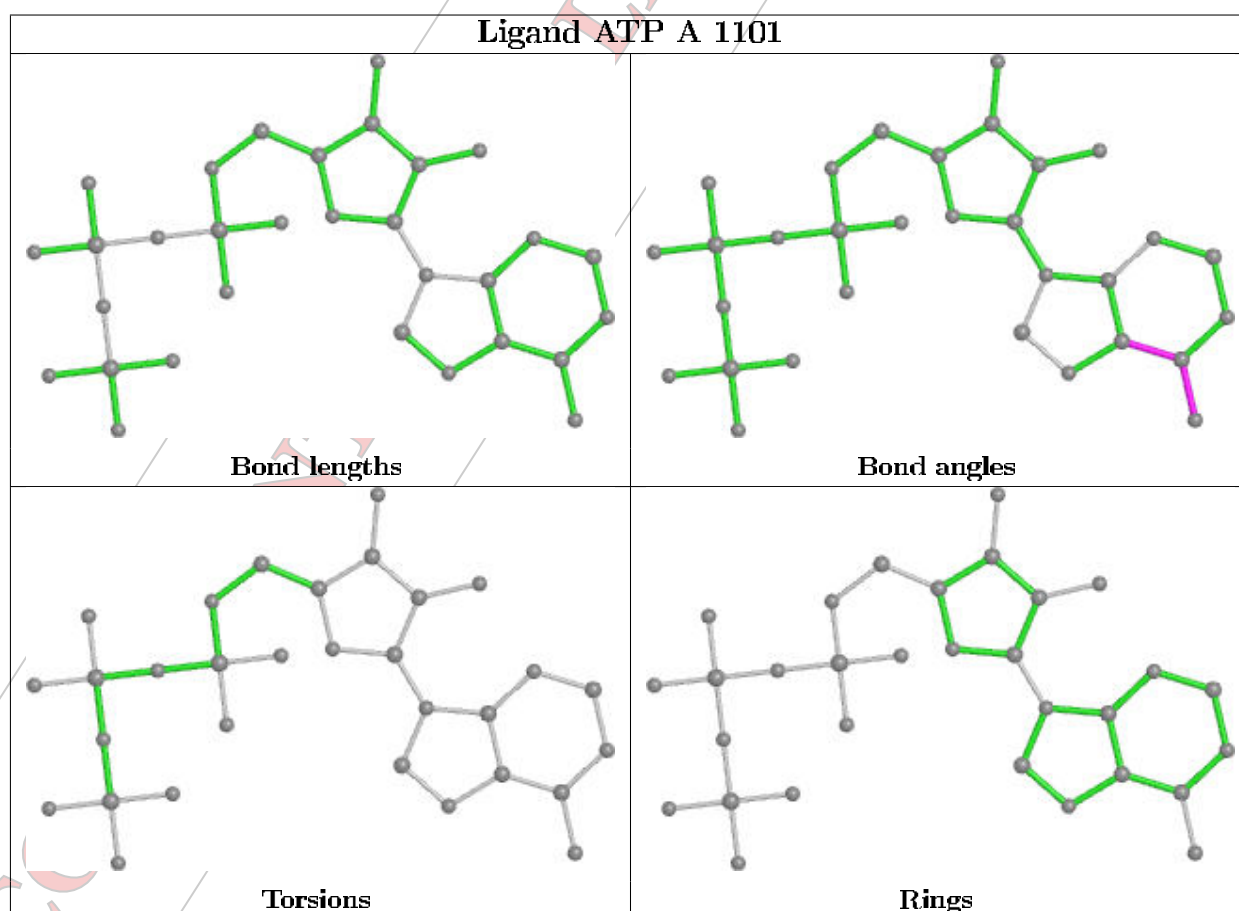

## 5.7 Other polymers [i](#)

There are no such residues in this entry.

## 5.8 Polymer linkage issues [i](#)

There are no chain breaks in this entry.

CONFIDENTIAL VALIDATION REPORT

## 6 Fit of model and data [i](#)

### 6.1 Protein, DNA and RNA chains [i](#)

In the following table, the column labelled '#RSRZ > 2' contains the number (and percentage) of RSRZ outliers, followed by percent RSRZ outliers for the chain as percentile scores relative to all X-ray entries and entries of similar resolution. The OWAB column contains the minimum, median, 95<sup>th</sup> percentile and maximum values of the occupancy-weighted average B-factor per residue. The column labelled 'Q < 0.9' lists the number of (and percentage) of residues with an average occupancy less than 0.9.

| Mol | Chain | Analysed      | <RSRZ> | #RSRZ > 2     | OWAB(Å <sup>2</sup> ) | Q < 0.9 |
|-----|-------|---------------|--------|---------------|-----------------------|---------|
| 1   | A     | 829/910 (91%) | 0.64   | 54 (6%) 18 22 | 50, 76, 115, 152      | 0       |

All (54) RSRZ outliers are listed below:

| Mol | Chain | Res | Type | RSRZ |
|-----|-------|-----|------|------|
| 1   | A     | 89  | LEU  | 5.3  |
| 1   | A     | 867 | CYS  | 4.7  |
| 1   | A     | 475 | ASN  | 4.5  |
| 1   | A     | 321 | ASN  | 3.8  |
| 1   | A     | 320 | SER  | 3.7  |
| 1   | A     | 675 | GLY  | 3.5  |
| 1   | A     | 734 | ALA  | 3.5  |
| 1   | A     | 476 | ILE  | 3.4  |
| 1   | A     | 90  | ASN  | 3.4  |
| 1   | A     | 818 | TYR  | 3.4  |
| 1   | A     | 498 | IIS  | 3.4  |
| 1   | A     | 494 | LEU  | 3.2  |
| 1   | A     | 693 | LEU  | 3.2  |
| 1   | A     | 352 | ASN  | 3.2  |
| 1   | A     | 521 | LEU  | 3.2  |
| 1   | A     | 319 | VAL  | 3.1  |
| 1   | A     | 318 | TRP  | 3.1  |
| 1   | A     | 489 | ILE  | 3.1  |
| 1   | A     | 92  | VAL  | 3.0  |
| 1   | A     | 689 | ARG  | 2.9  |
| 1   | A     | 979 | GLN  | 2.9  |
| 1   | A     | 988 | PIE  | 2.9  |
| 1   | A     | 387 | ASN  | 2.9  |
| 1   | A     | 478 | GLN  | 2.7  |
| 1   | A     | 388 | GLN  | 2.7  |
| 1   | A     | 6   | ASP  | 2.6  |
| 1   | A     | 3   | VAL  | 2.6  |

*Continued on next page...*

Continued from previous page...

| Mol | Chain | Res | Type | RSRZ |
|-----|-------|-----|------|------|
| 1   | A     | 91  | GLN  | 2.5  |
| 1   | A     | 314 | ILE  | 2.5  |
| 1   | A     | 401 | LYS  | 2.5  |
| 1   | A     | 474 | ARG  | 2.5  |
| 1   | A     | 967 | GLN  | 2.5  |
| 1   | A     | 477 | ILE  | 2.5  |
| 1   | A     | 2   | ALA  | 2.5  |
| 1   | A     | 322 | TYR  | 2.5  |
| 1   | A     | 402 | GLY  | 2.4  |
| 1   | A     | 61  | GLN  | 2.4  |
| 1   | A     | 384 | GLY  | 2.4  |
| 1   | A     | 821 | TIIR | 2.3  |
| 1   | A     | 823 | SER  | 2.3  |
| 1   | A     | 84  | TRP  | 2.3  |
| 1   | A     | 994 | GLU  | 2.3  |
| 1   | A     | 493 | LEU  | 2.2  |
| 1   | A     | 42  | ARG  | 2.2  |
| 1   | A     | 4   | GLN  | 2.2  |
| 1   | A     | 485 | LEU  | 2.2  |
| 1   | A     | 317 | ASN  | 2.2  |
| 1   | A     | 512 | PIIE | 2.2  |
| 1   | A     | 826 | ASP  | 2.1  |
| 1   | A     | 484 | TIIR | 2.1  |
| 1   | A     | 895 | GLN  | 2.0  |
| 1   | A     | 519 | TYR  | 2.0  |
| 1   | A     | 316 | SER  | 2.0  |
| 1   | A     | 454 | LEU  | 2.0  |

## 6.2 Non-standard residues in protein, DNA, RNA chains [i](#)

There are no non-standard protein/DNA/RNA residues in this entry.

## 6.3 Carbohydrates [i](#)

There are no monosaccharides in this entry.

## 6.4 Ligands [i](#)

In the following table, the Atoms column lists the number of modelled atoms in the group and the number defined in the chemical component dictionary. The B-factors column lists the minimum,

median, 95<sup>th</sup> percentile and maximum values of B factors of atoms in the group. The column labelled 'Q<0.9' lists the number of atoms with occupancy less than 0.9.

| Mol | Type | Chain | Res  | Atoms | RSCC | RSR  | B-factors(Å <sup>2</sup> ) | Q<0.9 |
|-----|------|-------|------|-------|------|------|----------------------------|-------|
| 4   | EDO  | A     | 1105 | 4/4   | 0.80 | 0.17 | 87,87,88,88                | 0     |
| 5   | MG   | A     | 1106 | 1/1   | 0.84 | 0.17 | 70,70,70,70                | 0     |
| 3   | SO4  | A     | 1103 | 5/5   | 0.85 | 0.39 | 139,140,140,140            | 0     |
| 3   | SO4  | A     | 1102 | 5/5   | 0.85 | 0.23 | 138,139,139,139            | 0     |
| 2   | ATP  | A     | 1101 | 31/31 | 0.91 | 0.16 | 73,80,109,109              | 0     |
| 4   | EDO  | A     | 1104 | 4/4   | 0.91 | 0.17 | 79,79,80,80                | 0     |

The following is a graphical depiction of the model fit to experimental electron density of all instances of the Ligand of Interest. In addition, ligands with molecular weight > 250 and outliers as shown on the geometry validation Tables will also be included. Each fit is shown from different orientation to approximate a three-dimensional view.

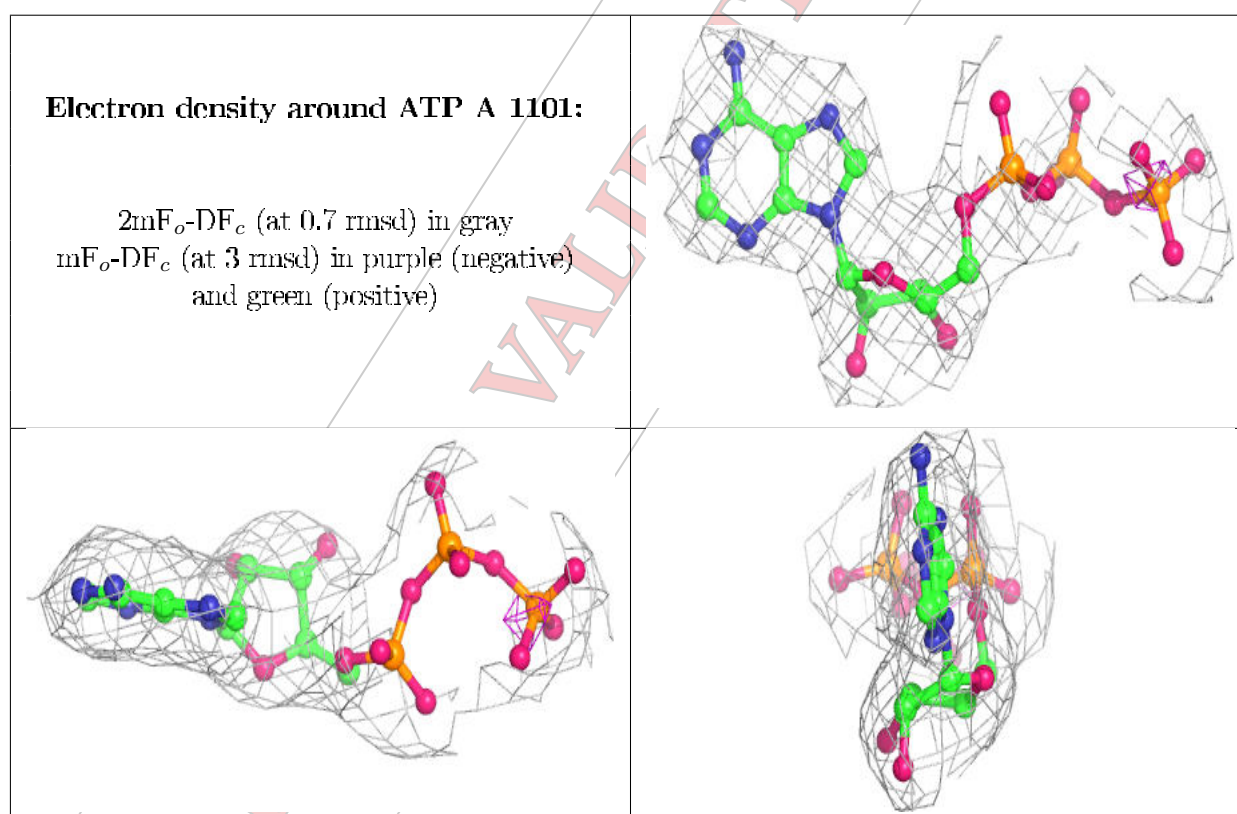

## 6.5 Other polymers [i](#)

There are no such residues in this entry.



## Full wwPDB X-ray Structure Validation Report ⓘ

Jan 15, 2021 – 06:08 PM GMT

PDB ID : 7BI9  
Title : PI3KC2a core in complex with PIK90  
Deposited on : 2021-01-12  
Resolution : 2.65 Å (reported)

This is a Full wwPDB X-ray Structure Validation Report.

This report is produced by the wwPDB biocuration pipeline after annotation of the structure.

We welcome your comments at [validation@mail.wwpdb.org](mailto:validation@mail.wwpdb.org)

A user guide is available at

<https://www.wwpdb.org/validation/2017/XrayValidationReportHelp>

with specific help available everywhere you see the ⓘ symbol.

---

The following versions of software and data (see [references ⓘ](#)) were used in the production of this report:

MolProbity : 4.02b-467  
Mogul : 1.8.5 (274361), CSD as541be (2020)  
Xtriage (Phenix) : 1.13  
EDS : 2.16  
buster-report : 1.1.7 (2018)  
Percentile statistics : 20191225.v01 (using entries in the PDB archive December 25th 2019)  
Refmac : 5.8.0158  
CCP4 : 7.0.044 (Gargrove)  
Ideal geometry (proteins) : Engh & Huber (2001)  
Ideal geometry (DNA, RNA) : Parkinson et al. (1996)  
Validation Pipeline (wwPDB-VP) : 2.16

## 1 Overall quality at a glance i

The following experimental techniques were used to determine the structure:  
*X-RAY DIFFRACTION*

The reported resolution of this entry is 2.65 Å.

Percentile scores (ranging between 0-100) for global validation metrics of the entry are shown in the following graphic. The table shows the number of entries on which the scores are based.

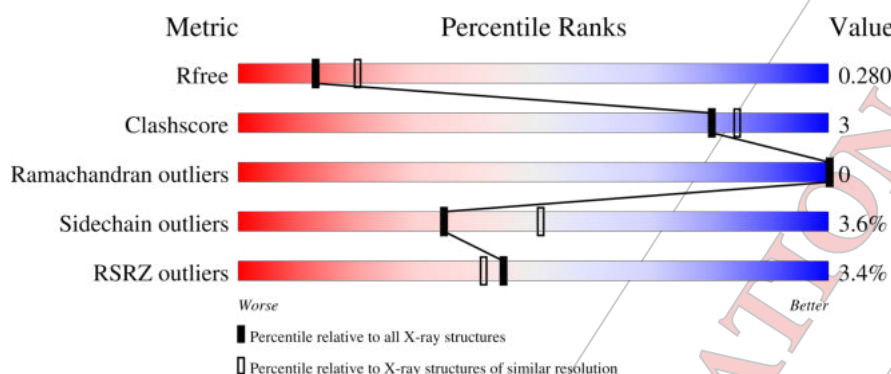

| Metric                | Whole archive<br>(#Entries) | Similar resolution<br>(#Entries, resolution range(Å)) |
|-----------------------|-----------------------------|-------------------------------------------------------|
| $R_{free}$            | 130704                      | 1332 (2.68-2.64)                                      |
| Clashscore            | 141614                      | 1374 (2.68-2.64)                                      |
| Ramachandran outliers | 138981                      | 1349 (2.68-2.64)                                      |
| Sidechain outliers    | 138945                      | 1349 (2.68-2.64)                                      |
| RSRZ outliers         | 127900                      | 1318 (2.68-2.64)                                      |

The table below summarises the geometric issues observed across the polymeric chains and their fit to the electron density. The red, orange, yellow and green segments of the lower bar indicate the fraction of residues that contain outliers for  $\geq 3$ , 2, 1 and 0 types of geometric quality criteria respectively. A grey segment represents the fraction of residues that are not modelled. The numeric value for each fraction is indicated below the corresponding segment, with a dot representing fractions  $\leq 5\%$ . The upper red bar (where present) indicates the fraction of residues that have poor fit to the electron density. The numeric value is given above the bar.

| Mol | Chain | Length | Quality of chain |
|-----|-------|--------|------------------|
| 1   | A     | 910    |                  |

The following table lists non-polymeric compounds, carbohydrate monomers and non-standard residues in protein, DNA, RNA chains that are outliers for geometric or electron-density-fit criteria:

| Mol | Type | Chain | Res  | Chirality | Geometry | Clashes | Electron density |
|-----|------|-------|------|-----------|----------|---------|------------------|
| 3   | EDO  | A     | 1102 | -         | -        | -       | X                |

*Continued on next page...*



*Continued from previous page...*

| Mol | Type | Chain | Res  | Chirality | Geometry | Clashes | Electron density |
|-----|------|-------|------|-----------|----------|---------|------------------|
| 3   | EDO  | A     | 1106 | -         | -        | -       | X                |

## 2 Entry composition

There are 4 unique types of molecules in this entry. The entry contains 6642 atoms, of which 0 are hydrogens and 0 are deuteriums.

In the tables below, the ZeroOcc column contains the number of atoms modelled with zero occupancy, the AltConf column contains the number of residues with at least one atom in alternate conformation and the Trace column contains the number of residues modelled with at most 2 atoms.

- Molecule 1 is a protein called Phosphatidylinositol 4-phosphate 3-kinase C2 domain-containing subunit alpha,Phosphatidylinositol 4-phosphate 3-kinase C2 domain-containing subunit alpha.

| Mol | Chain | Residues | Atoms |      |      |      |    | ZeroOcc | AltConf | Trace |
|-----|-------|----------|-------|------|------|------|----|---------|---------|-------|
|     |       |          | Total | C    | N    | O    | S  |         |         |       |
| 1   | A     | 821      | 6540  | 4201 | 1097 | 1201 | 41 | 0       | 1       | 0     |

There are 23 discrepancies between the modelled and reference sequences:

| Chain | Residue | Modelled | Actual | Comment             | Reference  |
|-------|---------|----------|--------|---------------------|------------|
| A     | 1       | GLY      | -      | expression tag      | UNP Q61194 |
| A     | 2       | ALA      | -      | expression tag      | UNP Q61194 |
| A     | 267     | GLY      | -      | linker              | UNP Q61194 |
| A     | 268     | SER      | -      | linker              | UNP Q61194 |
| A     | 269     | GLY      | -      | linker              | UNP Q61194 |
| A     | 270     | SER      | -      | linker              | UNP Q61194 |
| A     | 271     | VAL      | -      | linker              | UNP Q61194 |
| A     | 272     | MET      | -      | linker              | UNP Q61194 |
| A     | 273     | TIIR     | -      | linker              | UNP Q61194 |
| A     | 274     | ARG      | -      | linker              | UNP Q61194 |
| A     | 275     | IIS      | -      | linker              | UNP Q61194 |
| A     | 276     | SER      | -      | linker              | UNP Q61194 |
| A     | 277     | ALA      | -      | linker              | UNP Q61194 |
| A     | 278     | GLY      | -      | linker              | UNP Q61194 |
| A     | 279     | ALA      | -      | linker              | UNP Q61194 |
| A     | 280     | GLY      | -      | linker              | UNP Q61194 |
| A     | 281     | SER      | -      | linker              | UNP Q61194 |
| A     | 282     | GLY      | -      | linker              | UNP Q61194 |
| A     | 283     | ALA      | -      | linker              | UNP Q61194 |
| A     | 286     | GLY      | ALA    | conflict            | UNP Q61194 |
| A     | 353     | ALA      | PIIE   | engineered mutation | UNP Q61194 |
| A     | 354     | ALA      | PIIE   | engineered mutation | UNP Q61194 |
| A     | 427     | ALA      | LEU    | engineered mutation | UNP Q61194 |

- Molecule 2 is N-(2,3-DIHYDRO-7,8-DIMETHOXYIMIDAZO[1,2-C] QUINAZOLIN-5-YL)

NICOTINAMIDE (three-letter code: 090) (formula:  $C_{18}H_{16}N_5O_3$ ).

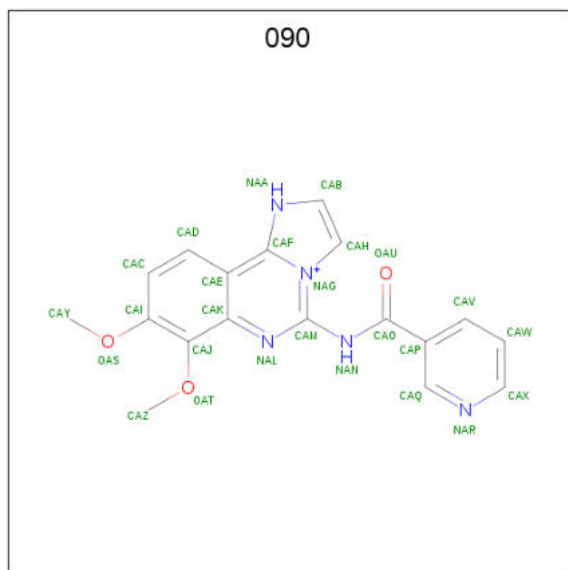

| Mol | Chain | Residues | Atoms |    |   | ZeroOcc | AltConf |   |
|-----|-------|----------|-------|----|---|---------|---------|---|
|     |       |          | Total | C  | N |         |         | O |
| 2   | A     | 1        | 26    | 18 | 5 | 3       | 0       | 0 |

- Molecule 3 is 1,2-ETHANEDIOL (three-letter code: EDO) (formula:  $C_2H_6O_2$ ).

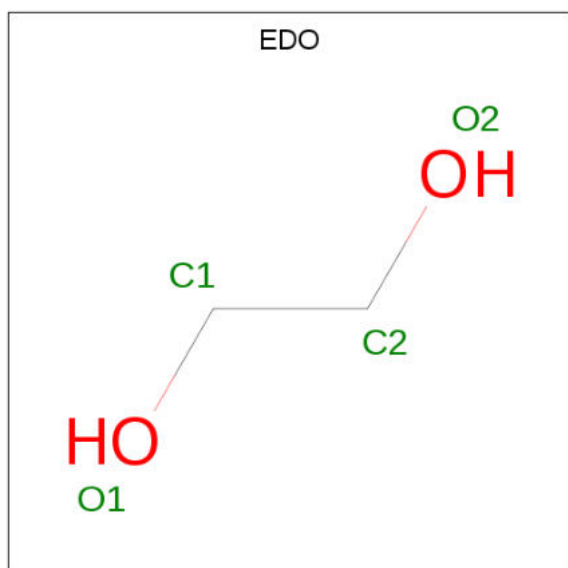

| Mol | Chain | Residues | Atoms |   |   | ZeroOcc | AltConf |
|-----|-------|----------|-------|---|---|---------|---------|
|     |       |          | Total | C | O |         |         |
| 3   | A     | 1        | 4     | 2 | 2 | 0       | 0       |
| 3   | A     | 1        | 4     | 2 | 2 | 0       | 0       |

*Continued on next page...*

Continued from previous page...

| Mol | Chain | Residues | Atoms |   |   | ZeroOcc | AltConf |
|-----|-------|----------|-------|---|---|---------|---------|
| 3   | A     | 1        | Total | C | O | 0       | 0       |
|     |       |          | 4     | 2 | 2 |         |         |
| 3   | A     | 1        | Total | C | O | 0       | 0       |
|     |       |          | 4     | 2 | 2 |         |         |
| 3   | A     | 1        | Total | C | O | 0       | 0       |
|     |       |          | 4     | 2 | 2 |         |         |

- Molecule 4 is water.

| Mol | Chain | Residues | Atoms |    | ZeroOcc | AltConf |
|-----|-------|----------|-------|----|---------|---------|
| 4   | A     | 56       | Total | O  | 0       | 0       |
|     |       |          | 56    | 56 |         |         |

### 3 Residue-property plots

These plots are drawn for all protein, RNA, DNA and oligosaccharide chains in the entry. The first graphic for a chain summarises the proportions of the various outlier classes displayed in the second graphic. The second graphic shows the sequence view annotated by issues in geometry and electron density. Residues are color-coded according to the number of geometric quality criteria for which they contain at least one outlier: green = 0, yellow = 1, orange = 2 and red = 3 or more. A red dot above a residue indicates a poor fit to the electron density ( $RSRZ > 2$ ). Stretches of 2 or more consecutive residues without any outlier are shown as a green connector. Residues present in the sample, but not in the model, are shown in grey.

- Molecule 1: Phosphatidylinositol 4-phosphate 3-kinase C2 domain-containing subunit alpha,Phosphatidylinositol 4-phosphate 3-kinase C2 domain-containing subunit alpha

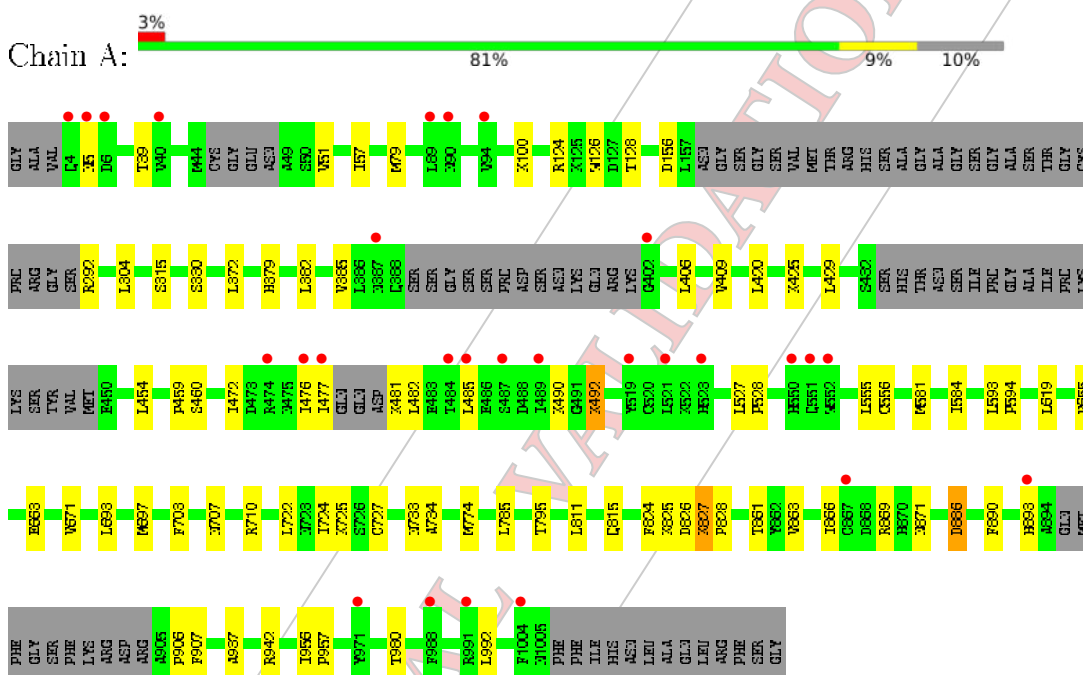

## 4 Data and refinement statistics

| Property                                                                | Value                                                  | Source           |
|-------------------------------------------------------------------------|--------------------------------------------------------|------------------|
| Space group                                                             | P 21 21 21                                             | Depositor        |
| Cell constants<br>a, b, c, $\alpha$ , $\beta$ , $\gamma$                | 55.94Å 135.40Å 151.60Å<br>90.00° 90.00° 90.00°         | Depositor        |
| Resolution (Å)                                                          | 48.94 – 2.65<br>48.94 – 2.65                           | Depositor<br>EDS |
| % Data completeness<br>(in resolution range)                            | 96.2 (48.94-2.65)<br>96.2 (48.94-2.65)                 | Depositor<br>EDS |
| $R_{merge}$                                                             | (Not available)                                        | Depositor        |
| $R_{sym}$                                                               | (Not available)                                        | Depositor        |
| $\langle I/\sigma(I) \rangle$ <sup>1</sup>                              | 1.12 (at 2.65Å)                                        | Xtriage          |
| Refinement program                                                      | REFMAC 5.8.0258                                        | Depositor        |
| $R$ , $R_{free}$                                                        | 0.233 ; 0.280<br>0.235 ; 0.280                         | Depositor<br>DCC |
| $R_{free}$ test set                                                     | 1655 reflections (5.00%)                               | wwPDB-VP         |
| Wilson B-factor (Å <sup>2</sup> )                                       | 70.0                                                   | Xtriage          |
| Anisotropy                                                              | 0.359                                                  | Xtriage          |
| Bulk solvent $k_{sol}$ (e/Å <sup>3</sup> ), $B_{sol}$ (Å <sup>2</sup> ) | 0.29 ; 31.6                                            | EDS              |
| L-test for twinning <sup>2</sup>                                        | $\langle  L  \rangle$ 0.49, $\langle L^2 \rangle$ 0.32 | Xtriage          |
| Estimated twinning fraction                                             | No twinning to report.                                 | Xtriage          |
| $F_o:F_c$ correlation                                                   | 0.94                                                   | EDS              |
| Total number of atoms                                                   | 6642                                                   | wwPDB-VP         |
| Average B, all atoms (Å <sup>2</sup> )                                  | 80.0                                                   | wwPDB-VP         |

Xtriage's analysis on translational NCS is as follows: *The largest off-origin peak in the Patterson function is 4.57% of the height of the origin peak. No significant pseudotranslation is detected.*

<sup>1</sup> Intensities estimated from amplitudes.

<sup>2</sup> Theoretical values of  $\langle |L| \rangle$ ,  $\langle L^2 \rangle$  for acentric reflections are 0.5, 0.333 respectively for untwinned datasets, and 0.375, 0.2 for perfectly twinned datasets.

## 5 Model quality

### 5.1 Standard geometry

Bond lengths and bond angles in the following residue types are not validated in this section: 090, EDO

The Z score for a bond length (or angle) is the number of standard deviations the observed value is removed from the expected value. A bond length (or angle) with  $|Z| > 5$  is considered an outlier worth inspection. RMSZ is the root-mean-square of all Z scores of the bond lengths (or angles).

| Mol | Chain | Bond lengths |         | Bond angles |         |
|-----|-------|--------------|---------|-------------|---------|
|     |       | RMSZ         | # Z  >5 | RMSZ        | # Z  >5 |
| 1   | A     | 0.65         | 0/6676  | 0.71        | 0/9034  |

There are no bond length outliers.

There are no bond angle outliers.

There are no chirality outliers.

There are no planarity outliers.

### 5.2 Too-close contacts

In the following table, the Non-H and H(model) columns list the number of non-hydrogen atoms and hydrogen atoms in the chain respectively. The H(added) column lists the number of hydrogen atoms added and optimized by MolProbity. The Clashes column lists the number of clashes within the asymmetric unit, whereas Symm-Clashes lists symmetry-related clashes.

| Mol | Chain | Non-H | H(model) | H(added) | Clashes | Symm-Clashes |
|-----|-------|-------|----------|----------|---------|--------------|
| 1   | A     | 6540  | 0        | 6610     | 36      | 0            |
| 2   | A     | 26    | 0        | 16       | 0       | 0            |
| 3   | A     | 20    | 0        | 30       | 3       | 0            |
| 4   | A     | 56    | 0        | 0        | 0       | 0            |
| All | All   | 6642  | 0        | 6656     | 36      | 0            |

The all-atom clashscore is defined as the number of clashes found per 1000 atoms (including hydrogen atoms). The all-atom clashscore for this structure is 3.

All (36) close contacts within the same asymmetric unit are listed below, sorted by their clash magnitude.

| Atom-1             | Atom-2             | Interatomic distance (Å) | Clash overlap (Å) |
|--------------------|--------------------|--------------------------|-------------------|
| 1:A:866:ILE:IIG22  | 1:A:869:ARG:IID3   | 1.66                     | 0.76              |
| 1:A:722:LEU:IID21  | 1:A:727:CYS:SG     | 2.28                     | 0.73              |
| 1:A:472:ILE:IID12  | 1:A:472:ILE:II     | 1.58                     | 0.68              |
| 1:A:51:VAL:IIG11   | 1:A:124:ARG:IID3   | 1.76                     | 0.67              |
| 1:A:420:LEU:IID23  | 3:A:1105:EDO:II11  | 1.79                     | 0.64              |
| 1:A:866:ILE:CG2    | 1:A:869:ARG:IID3   | 2.30                     | 0.60              |
| 1:A:906:PRO:IIG3   | 1:A:992:LEU:IID22  | 1.85                     | 0.59              |
| 1:A:485:LEU:IIG    | 1:A:490:LYS:II3    | 1.87                     | 0.57              |
| 1:A:481:LYS:IIG3   | 1:A:482:LEU:IID22  | 1.88                     | 0.56              |
| 1:A:827:LYS:N      | 1:A:828:PRO:CD     | 2.69                     | 0.55              |
| 1:A:827:LYS:N      | 1:A:828:PRO:IID2   | 2.22                     | 0.55              |
| 1:A:671:VAL:IIG11  | 1:A:795:TIIR:IIB   | 1.89                     | 0.54              |
| 1:A:619:LEU:IID21  | 1:A:655:VAL:IIG13  | 1.90                     | 0.53              |
| 1:A:861:TIIR:IIG21 | 1:A:907:PIIE:IIB3  | 1.94                     | 0.50              |
| 1:A:703:PIIE:O     | 1:A:707:ASN:IIB2   | 2.44                     | 0.47              |
| 1:A:811:LEU:O      | 1:A:815:GLN:IIG3   | 2.15                     | 0.47              |
| 1:A:477:ILE:N      | 1:A:477:ILE:IID12  | 2.30                     | 0.47              |
| 1:A:663:GLU:IIG2   | 1:A:710:ARG:IID2   | 1.98                     | 0.45              |
| 1:A:869:ARG:NI1    | 1:A:886:ASP:O      | 2.44                     | 0.45              |
| 1:A:733:ASN:O      | 1:A:734:ALA:IIB3   | 2.17                     | 0.45              |
| 1:A:382:LEU:CD2    | 1:A:406:LEU:IID12  | 2.47                     | 0.45              |
| 1:A:492:LYS:IID2   | 1:A:492:LYS:N      | 2.31                     | 0.45              |
| 1:A:956:ILE:N      | 1:A:957:PRO:IID2   | 2.31                     | 0.45              |
| 1:A:126:TRP:IIB2   | 1:A:128:TIIR:IIG23 | 2.00                     | 0.44              |
| 1:A:581:MET:O      | 1:A:584:ILE:IIG22  | 2.17                     | 0.44              |
| 1:A:409:VAL:CG1    | 1:A:429:LEU:IIB3   | 2.48                     | 0.43              |
| 1:A:942:ARG:NI2    | 1:A:980:TIIR:O     | 2.52                     | 0.43              |
| 1:A:527:LEU:IIB3   | 1:A:528:PRO:IID3   | 2.00                     | 0.43              |
| 1:A:304:LEU:IID13  | 1:A:372:LEU:IID11  | 2.02                     | 0.42              |
| 1:A:459:PRO:O      | 3:A:1105:EDO:II21  | 2.19                     | 0.41              |
| 1:A:693:LEU:IID23  | 1:A:697:MET:IIG2   | 2.01                     | 0.41              |
| 1:A:420:LEU:IID23  | 3:A:1105:EDO:C1    | 2.48                     | 0.40              |
| 1:A:330:SER:OG     | 1:A:379:IIIS:IIB2  | 2.21                     | 0.40              |
| 1:A:593:LEU:N      | 1:A:594:PRO:CD     | 2.84                     | 0.40              |
| 1:A:774:MET:II1    | 1:A:863:VAL:CG1    | 2.51                     | 0.40              |
| 1:A:785:LEU:IID11  | 1:A:937:ALA:IIB2   | 2.02                     | 0.40              |

There are no symmetry-related clashes.



## 5.3 Torsion angles [i](#)

### 5.3.1 Protein backbone [i](#)

In the following table, the Percentiles column shows the percent Ramachandran outliers of the chain as a percentile score with respect to all X-ray entries followed by that with respect to entries of similar resolution.

The Analysed column shows the number of residues for which the backbone conformation was analysed, and the total number of residues.

| Mol | Chain | Analysed      | Favoured  | Allowed | Outliers | Percentiles |
|-----|-------|---------------|-----------|---------|----------|-------------|
| 1   | A     | 808/910 (89%) | 782 (97%) | 26 (3%) | 0        | 100 100     |

There are no Ramachandran outliers to report.

### 5.3.2 Protein sidechains [i](#)

In the following table, the Percentiles column shows the percent sidechain outliers of the chain as a percentile score with respect to all X-ray entries followed by that with respect to entries of similar resolution.

The Analysed column shows the number of residues for which the sidechain conformation was analysed, and the total number of residues.

| Mol | Chain | Analysed      | Rotameric | Outliers | Percentiles |
|-----|-------|---------------|-----------|----------|-------------|
| 1   | A     | 730/800 (91%) | 704 (96%) | 26 (4%)  | 35 51       |

All (26) residues with a non-rotameric sidechain are listed below:

| Mol | Chain | Res | Type |
|-----|-------|-----|------|
| 1   | A     | 5   | ASN  |
| 1   | A     | 39  | THR  |
| 1   | A     | 57  | ILE  |
| 1   | A     | 79  | MET  |
| 1   | A     | 100 | LYS  |
| 1   | A     | 156 | ASP  |
| 1   | A     | 292 | ARG  |
| 1   | A     | 315 | SER  |
| 1   | A     | 385 | VAL  |
| 1   | A     | 425 | LYS  |
| 1   | A     | 454 | LEU  |
| 1   | A     | 460 | SER  |
| 1   | A     | 476 | ILE  |

*Continued on next page...*

*Continued from previous page...*

| Mol | Chain | Res | Type |
|-----|-------|-----|------|
| 1   | A     | 492 | LYS  |
| 1   | A     | 555 | LEU  |
| 1   | A     | 556 | CYS  |
| 1   | A     | 724 | ILE  |
| 1   | A     | 725 | LYS  |
| 1   | A     | 824 | PIIE |
| 1   | A     | 825 | LYS  |
| 1   | A     | 826 | ASP  |
| 1   | A     | 827 | LYS  |
| 1   | A     | 871 | ASN  |
| 1   | A     | 886 | ASP  |
| 1   | A     | 890 | PIIE |
| 1   | A     | 893 | IIS  |

Sometimes sidechains can be flipped to improve hydrogen bonding and reduce clashes. All (4) such sidechains are listed below:

| Mol | Chain | Res | Type |
|-----|-------|-----|------|
| 1   | A     | 41  | GLN  |
| 1   | A     | 109 | GLN  |
| 1   | A     | 312 | IIS  |
| 1   | A     | 944 | GLN  |

### 5.3.3 RNA [i](#)

There are no RNA molecules in this entry.

### 5.4 Non-standard residues in protein, DNA, RNA chains [i](#)

There are no non-standard protein/DNA/RNA residues in this entry.

### 5.5 Carbohydrates [i](#)

There are no monosaccharides in this entry.

### 5.6 Ligand geometry [i](#)

6 ligands are modelled in this entry.

In the following table, the Counts columns list the number of bonds (or angles) for which Mogul statistics could be retrieved, the number of bonds (or angles) that are observed in the model and the number of bonds (or angles) that are defined in the Chemical Component Dictionary. The Link column lists molecule types, if any, to which the group is linked. The Z score for a bond length (or angle) is the number of standard deviations the observed value is removed from the expected value. A bond length (or angle) with  $|Z| > 2$  is considered an outlier worth inspection. RMSZ is the root-mean-square of all Z scores of the bond lengths (or angles).

| Mol | Type | Chain | Res  | Link | Bond lengths |      |          | Bond angles |      |          |
|-----|------|-------|------|------|--------------|------|----------|-------------|------|----------|
|     |      |       |      |      | Counts       | RMSZ | # Z  > 2 | Counts      | RMSZ | # Z  > 2 |
| 3   | EDO  | A     | 1103 | -    | 3,3,3        | 0.05 | 0        | 2,2,2       | 0.23 | 0        |
| 3   | EDO  | A     | 1104 | -    | 3,3,3        | 0.06 | 0        | 2,2,2       | 0.20 | 0        |
| 2   | 090  | A     | 1101 | -    | 25,29,29     | 1.92 | 6 (24%)  | 31,41,41    | 4.97 | 9 (29%)  |
| 3   | EDO  | A     | 1105 | -    | 3,3,3        | 0.10 | 0        | 2,2,2       | 0.37 | 0        |
| 3   | EDO  | A     | 1106 | -    | 3,3,3        | 0.08 | 0        | 2,2,2       | 0.24 | 0        |
| 3   | EDO  | A     | 1102 | -    | 3,3,3        | 0.06 | 0        | 2,2,2       | 0.21 | 0        |

In the following table, the Chirals column lists the number of chiral outliers, the number of chiral centers analysed, the number of these observed in the model and the number defined in the Chemical Component Dictionary. Similar counts are reported in the Torsions and Rings columns. - means no outliers of that kind were identified.

| Mol | Type | Chain | Res  | Link | Chirals | Torsions   | Rings   |
|-----|------|-------|------|------|---------|------------|---------|
| 3   | EDO  | A     | 1103 | -    | -       | 1/1/1/1    | -       |
| 3   | EDO  | A     | 1104 | -    | -       | 0/1/1/1    | -       |
| 2   | 090  | A     | 1101 | -    | -       | 2/12/12/12 | 0/4/4/4 |
| 3   | EDO  | A     | 1105 | -    | -       | 1/1/1/1    | -       |
| 3   | EDO  | A     | 1106 | -    | -       | 0/1/1/1    | -       |
| 3   | EDO  | A     | 1102 | -    | -       | 1/1/1/1    | -       |

All (6) bond length outliers are listed below:

| Mol | Chain | Res  | Type | Atoms   | Z     | Observed(Å) | Ideal(Å) |
|-----|-------|------|------|---------|-------|-------------|----------|
| 2   | A     | 1101 | 090  | CAE-CAK | -6.06 | 1.37        | 1.41     |
| 2   | A     | 1101 | 090  | CAO-NAN | 3.70  | 1.45        | 1.35     |
| 2   | A     | 1101 | 090  | CAF-NAA | 3.00  | 1.36        | 1.33     |
| 2   | A     | 1101 | 090  | CAM-NAN | 2.40  | 1.45        | 1.36     |
| 2   | A     | 1101 | 090  | OAU-CAO | -2.21 | 1.18        | 1.23     |
| 2   | A     | 1101 | 090  | OAS-CAI | 2.02  | 1.40        | 1.37     |

All (9) bond angle outliers are listed below:

| Mol | Chain | Res  | Type | Atoms       | Z      | Observed(°) | Ideal(°) |
|-----|-------|------|------|-------------|--------|-------------|----------|
| 2   | A     | 1101 | 090  | OAT-CAJ-CAK | -17.77 | 89.94       | 120.20   |

Continued on next page...

Continued from previous page...

| Mol | Chain | Res  | Type | Atoms       | Z      | Observed(°) | Ideal(°) |
|-----|-------|------|------|-------------|--------|-------------|----------|
| 2   | A     | 1101 | 090  | OAS-CAI-CAJ | -12.49 | 98.98       | 116.49   |
| 2   | A     | 1101 | 090  | OAT-CAJ-CAI | 12.01  | 149.50      | 120.84   |
| 2   | A     | 1101 | 090  | OAS-CAI-CAC | 9.46   | 140.58      | 124.37   |
| 2   | A     | 1101 | 090  | CAE-CAK-NAL | -3.17  | 118.95      | 123.33   |
| 2   | A     | 1101 | 090  | CAD-CAE-CAF | -3.05  | 118.21      | 122.55   |
| 2   | A     | 1101 | 090  | CAJ-CAK-NAL | 2.82   | 123.33      | 118.98   |
| 2   | A     | 1101 | 090  | CAY-OAS-CAI | -2.52  | 113.72      | 117.53   |
| 2   | A     | 1101 | 090  | CAD-CAE-CAK | 2.22   | 121.19      | 117.59   |

There are no chirality outliers.

All (5) torsion outliers are listed below:

| Mol | Chain | Res  | Type | Atoms           |
|-----|-------|------|------|-----------------|
| 2   | A     | 1101 | 090  | NAL-CAM-NAN-CAO |
| 2   | A     | 1101 | 090  | NAG-CAM-NAN-CAO |
| 3   | A     | 1103 | EDO  | O1-C1-C2-O2     |
| 3   | A     | 1105 | EDO  | O1-C1-C2-O2     |
| 3   | A     | 1102 | EDO  | O1-C1-C2-O2     |

There are no ring outliers.

1 monomer is involved in 3 short contacts:

| Mol | Chain | Res  | Type | Clashes | Symm-Clashes |
|-----|-------|------|------|---------|--------------|
| 3   | A     | 1105 | EDO  | 3       | 0            |

The following is a two-dimensional graphical depiction of Mogul quality analysis of bond lengths, bond angles, torsion angles, and ring geometry for all instances of the Ligand of Interest. In addition, ligands with molecular weight > 250 and outliers as shown on the validation Tables will also be included. For torsion angles, if less than 5% of the Mogul distribution of torsion angles is within 10 degrees of the torsion angle in question, then that torsion angle is considered an outlier. Any bond that is central to one or more torsion angles identified as an outlier by Mogul will be highlighted in the graph. For rings, the root-mean-square deviation (RMSD) between the ring in question and similar rings identified by Mogul is calculated over all ring torsion angles. If the average RMSD is greater than 60 degrees and the minimal RMSD between the ring in question and any Mogul-identified rings is also greater than 60 degrees, then that ring is considered an outlier. The outliers are highlighted in purple. The color gray indicates Mogul did not find sufficient equivalents in the CSD to analyse the geometry.

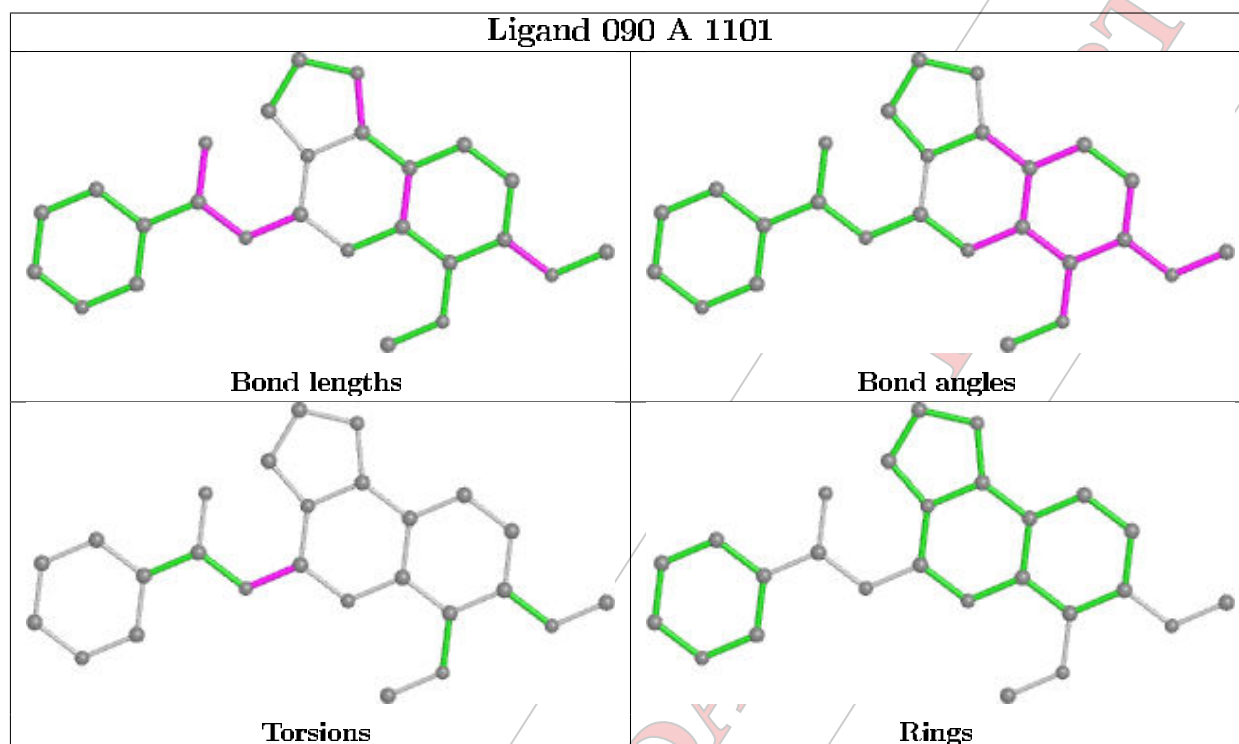

### 5.7 Other polymers [i](#)

There are no such residues in this entry.

### 5.8 Polymer linkage issues [i](#)

There are no chain breaks in this entry.

## 6 Fit of model and data [i](#)

### 6.1 Protein, DNA and RNA chains [i](#)

In the following table, the column labelled '#RSRZ > 2' contains the number (and percentage) of RSRZ outliers, followed by percent RSRZ outliers for the chain as percentile scores relative to all X-ray entries and entries of similar resolution. The OWAB column contains the minimum, median, 95<sup>th</sup> percentile and maximum values of the occupancy-weighted average B-factor per residue. The column labelled 'Q < 0.9' lists the number of (and percentage) of residues with an average occupancy less than 0.9.

| Mol | Chain | Analysed      | <RSRZ> | #RSRZ > 2     | OWAB(Å <sup>2</sup> ) | Q < 0.9 |
|-----|-------|---------------|--------|---------------|-----------------------|---------|
| 1   | A     | 821/910 (90%) | 0.31   | 28 (3%) 45 41 | 51, 76, 118, 159      | 0       |

All (28) RSRZ outliers are listed below:

| Mol | Chain | Res  | Type | RSRZ |
|-----|-------|------|------|------|
| 1   | A     | 485  | LEU  | 4.6  |
| 1   | A     | 893  | IIS  | 3.8  |
| 1   | A     | 476  | ILE  | 3.3  |
| 1   | A     | 991  | ARG  | 3.3  |
| 1   | A     | 489  | ILE  | 3.3  |
| 1   | A     | 89   | LEU  | 3.2  |
| 1   | A     | 988  | PIIE | 3.1  |
| 1   | A     | 1004 | PIIE | 3.1  |
| 1   | A     | 477  | ILE  | 2.9  |
| 1   | A     | 487  | SER  | 2.8  |
| 1   | A     | 523  | IIS  | 2.8  |
| 1   | A     | 90   | ASN  | 2.6  |
| 1   | A     | 551  | GLN  | 2.5  |
| 1   | A     | 519  | TYR  | 2.5  |
| 1   | A     | 4    | GLN  | 2.5  |
| 1   | A     | 484  | TIIR | 2.4  |
| 1   | A     | 550  | IIS  | 2.4  |
| 1   | A     | 867  | CYS  | 2.4  |
| 1   | A     | 94   | VAL  | 2.4  |
| 1   | A     | 6    | ASP  | 2.3  |
| 1   | A     | 402  | GLY  | 2.3  |
| 1   | A     | 5    | ASN  | 2.2  |
| 1   | A     | 552  | TRP  | 2.1  |
| 1   | A     | 387  | ASN  | 2.1  |
| 1   | A     | 474  | ARG  | 2.1  |
| 1   | A     | 521  | LEU  | 2.0  |
| 1   | A     | 971  | TYR  | 2.0  |

*Continued on next page...*

Continued from previous page...

| Mol | Chain | Res | Type | RSRZ |
|-----|-------|-----|------|------|
| 1   | A     | 40  | VAL  | 2.0  |

## 6.2 Non-standard residues in protein, DNA, RNA chains [i](#)

There are no non-standard protein/DNA/RNA residues in this entry.

## 6.3 Carbohydrates [i](#)

There are no monosaccharides in this entry.

## 6.4 Ligands [i](#)

In the following table, the Atoms column lists the number of modelled atoms in the group and the number defined in the chemical component dictionary. The B-factors column lists the minimum, median, 95<sup>th</sup> percentile and maximum values of B factors of atoms in the group. The column labelled 'Q<0.9' lists the number of atoms with occupancy less than 0.9.

| Mol | Type | Chain | Res  | Atoms | RSCC | RSR  | B-factors(Å <sup>2</sup> ) | Q<0.9 |
|-----|------|-------|------|-------|------|------|----------------------------|-------|
| 3   | EDO  | A     | 1106 | 4/4   | 0.58 | 0.45 | 110,110,110,111            | 0     |
| 3   | EDO  | A     | 1102 | 4/4   | 0.65 | 0.48 | 98,99,100,102              | 0     |
| 3   | EDO  | A     | 1105 | 4/4   | 0.66 | 0.26 | 92,92,92,93                | 0     |
| 3   | EDO  | A     | 1103 | 4/4   | 0.83 | 0.40 | 87,87,87,87                | 0     |
| 2   | 090  | A     | 1101 | 26/26 | 0.86 | 0.23 | 94,99,104,106              | 0     |
| 3   | EDO  | A     | 1104 | 4/4   | 0.88 | 0.23 | 94,95,95,95                | 0     |

The following is a graphical depiction of the model fit to experimental electron density of all instances of the Ligand of Interest. In addition, ligands with molecular weight > 250 and outliers as shown on the geometry validation Tables will also be included. Each fit is shown from different orientation to approximate a three-dimensional view.

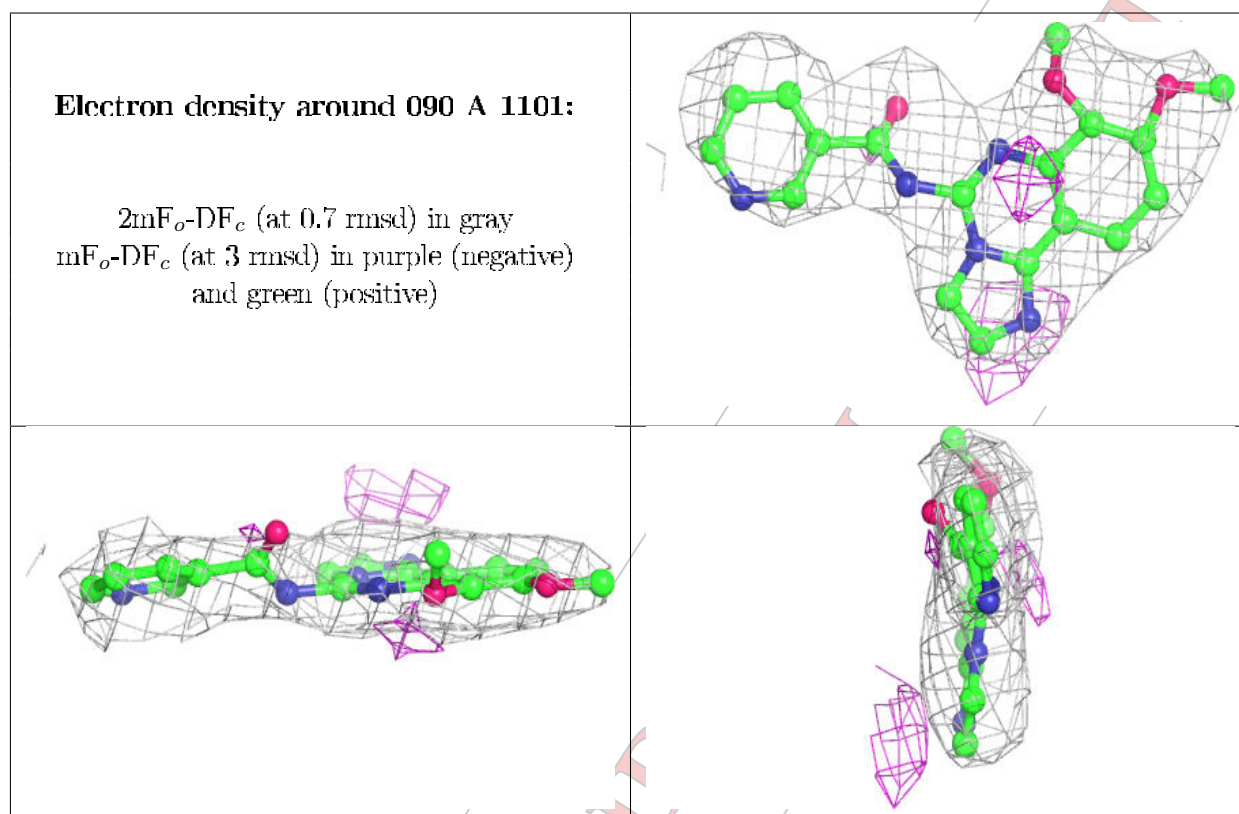

## 6.5 Other polymers [i](#)

There are no such residues in this entry.

CONFIDENTIAL





## Full wwPDB EM Validation Report ⓘ

Jan 18, 2021 – 03:41 PM GMT

EMDB ID : EMD-12191  
Title : Cryo-EM structure of the Phosphatidylinositol 3-kinase type 2a (PI3KC2a) of the class II PI3K family  
Deposited on : 2021-01-12  
Resolution : 4.40 Å (reported)

This is a Full wwPDB EM Validation Report.

This report is produced by the wwPDB biocuration pipeline after annotation of the structure.

We welcome your comments at [validation@mail.wwpdb.org](mailto:validation@mail.wwpdb.org)

A user guide is available at

<https://www.wwpdb.org/validation/2017/EMMapValidationReportHelp>

with specific help available everywhere you see the ⓘ symbol.

---

The following versions of software and data (see [references ⓘ](#)) were used in the production of this report:

EMDB validation analysis : 0.0.0.dev61  
Validation Pipeline (wwPDB-VP) : 2.16

## 1 Experimental information

| Property                             | Value                                                                                                                                                 | Source    |
|--------------------------------------|-------------------------------------------------------------------------------------------------------------------------------------------------------|-----------|
| EM reconstruction method             | SINGLE PARTICLE                                                                                                                                       | Depositor |
| Imposed symmetry                     | POINT, C1                                                                                                                                             | Depositor |
| Number of particles used             | 601000                                                                                                                                                | Depositor |
| Resolution determination method      | FSC 0.143 CUT-OFF                                                                                                                                     | Depositor |
| CTF correction method                | PIIASE FLIPPING ONLY; CTF estimation was performed after motion correction. And Ctf local refine was performed after 3D reconstruction, in cryospare. | Depositor |
| Microscope                           | FEI TITAN KRIOS                                                                                                                                       | Depositor |
| Voltage (kV)                         | 300                                                                                                                                                   | Depositor |
| Electron dose ( $e^-/\text{\AA}^2$ ) | 60                                                                                                                                                    | Depositor |
| Minimum defocus (nm)                 | 1200                                                                                                                                                  | Depositor |
| Maximum defocus (nm)                 | 3300                                                                                                                                                  | Depositor |
| Magnification                        | 105000                                                                                                                                                | Depositor |
| Image detector                       | GATAN K3 (6k x 4k)                                                                                                                                    | Depositor |
| Maximum map value                    | 0.235                                                                                                                                                 | Depositor |
| Minimum map value                    | -0.098                                                                                                                                                | Depositor |
| Average map value                    | 0.000                                                                                                                                                 | Depositor |
| Map value standard deviation         | 0.010                                                                                                                                                 | Depositor |
| Recommended contour level            | 0.05                                                                                                                                                  | Depositor |
| Map size (Å)                         | 217.62001, 217.62001, 217.62001                                                                                                                       | wwPDB     |
| Map dimensions                       | 260, 260, 260                                                                                                                                         | wwPDB     |
| Map angles (°)                       | 90.0, 90.0, 90.0                                                                                                                                      | wwPDB     |
| Pixel spacing (Å)                    | 0.837, 0.837, 0.837                                                                                                                                   | Depositor |

## 2 Map visualisation [i](#)

This section contains visualisations of the EMDB entry EMD-12191. These allow visual inspection of the internal detail of the map and identification of artifacts.

Images derived from a raw map, generated by summing the deposited half-maps, are presented below the corresponding image components of the primary map to allow further visual inspection and comparison with those of the primary map.

### 2.1 Orthogonal projections [i](#)

#### 2.1.1 Primary map

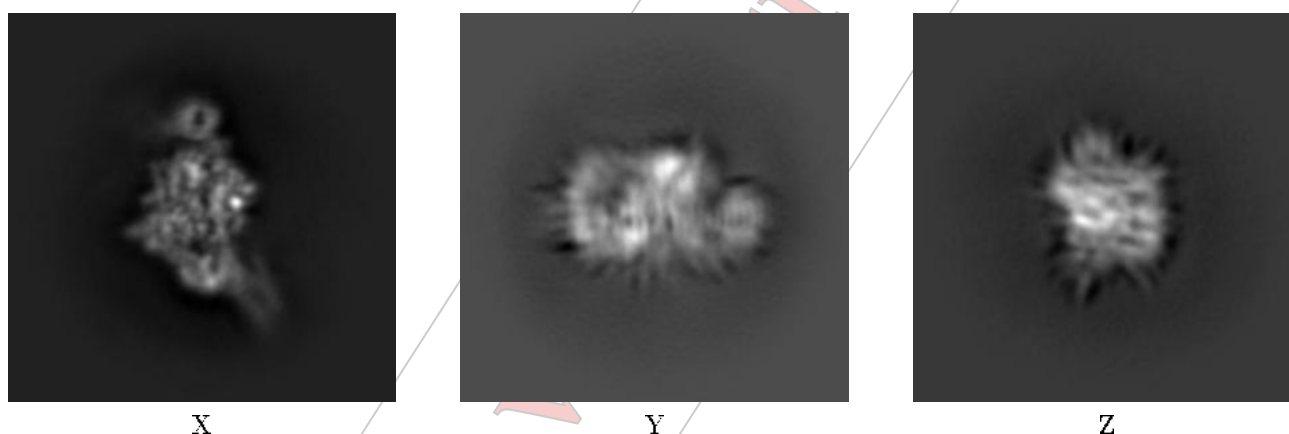

#### 2.1.2 Raw map

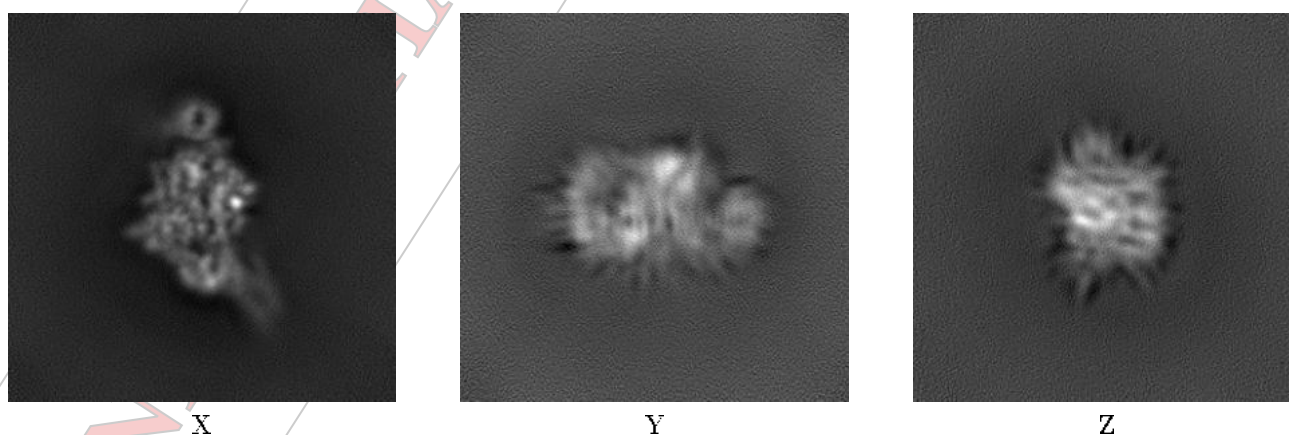

The images above show the map projected in three orthogonal directions.

## 2.2 Central slices [i](#)

### 2.2.1 Primary map

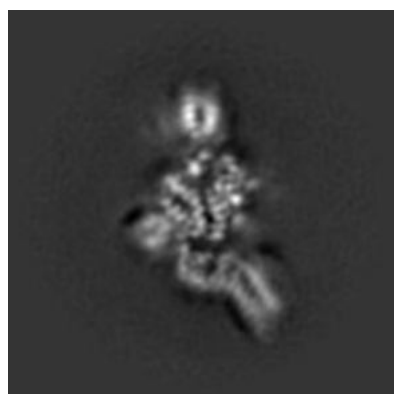

X Index: 130

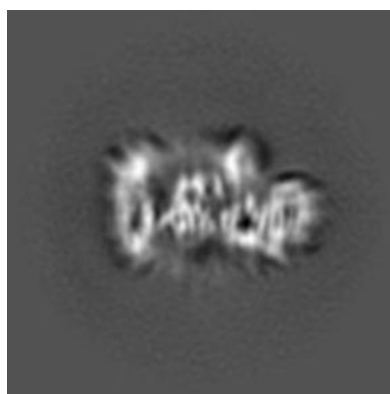

Y Index: 130

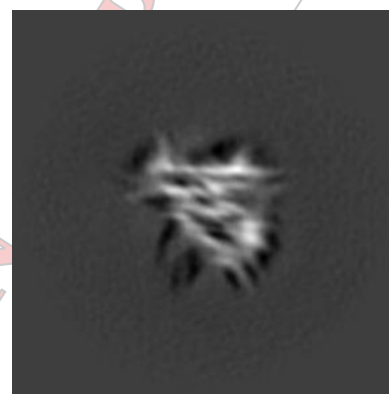

Z Index: 130

### 2.2.2 Raw map

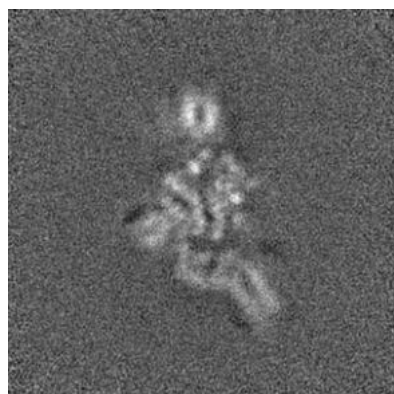

X Index: 130

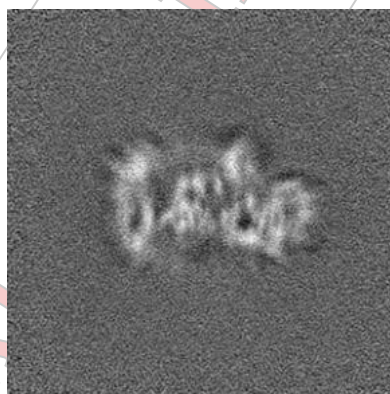

Y Index: 130

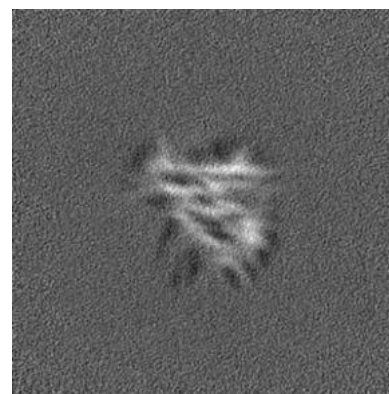

Z Index: 130

The images above show central slices of the map in three orthogonal directions.

## 2.3 Largest variance slices [i](#)

### 2.3.1 Primary map

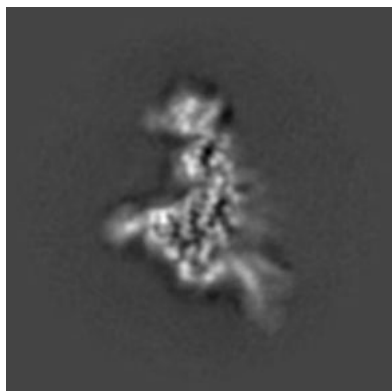

X Index: 112

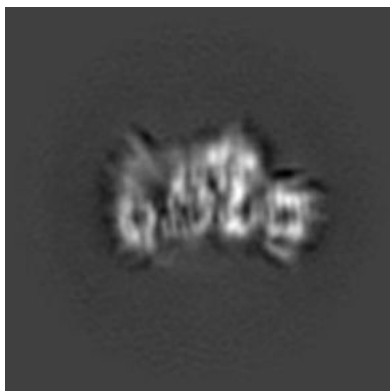

Y Index: 123

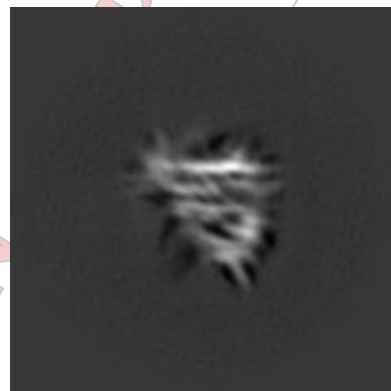

Z Index: 133

### 2.3.2 Raw map

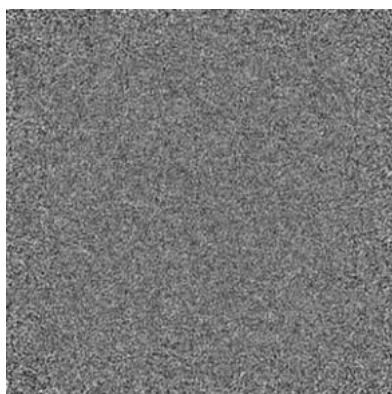

X Index: 0

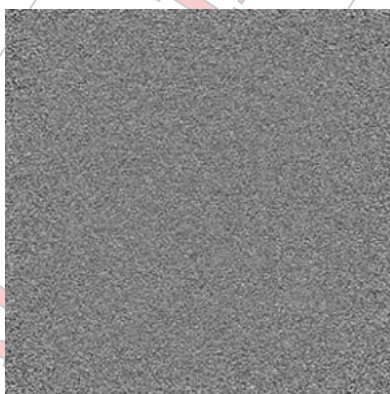

Y Index: 0

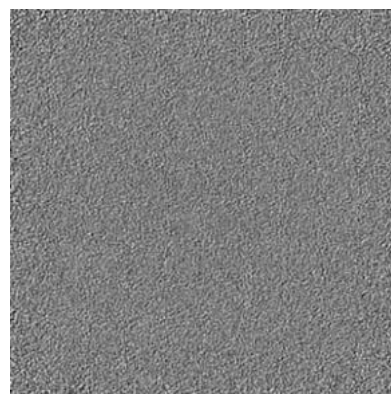

Z Index: 0

The images above show the largest variance slices of the map in three orthogonal directions.

## 2.4 Orthogonal surface views

### 2.4.1 Primary map

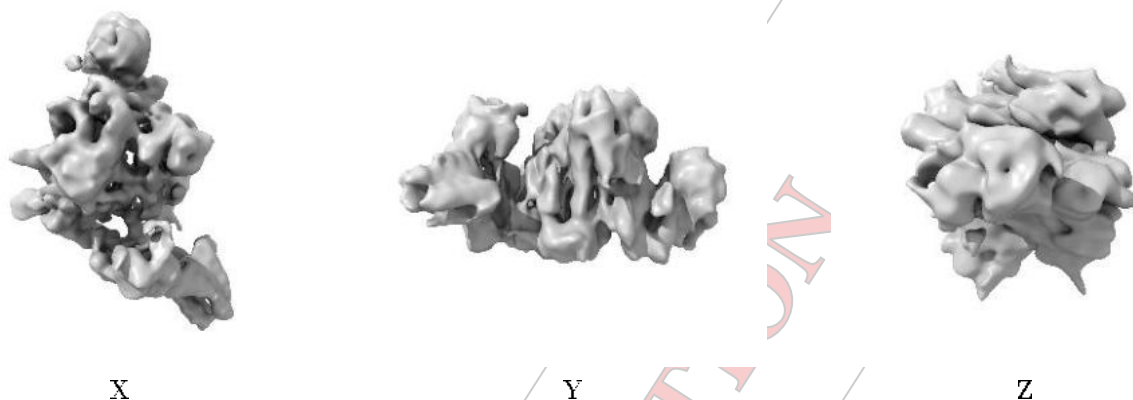

The images above show the 3D surface view of the map at the recommended contour level 0.05. These images, in conjunction with the slice images, may facilitate assessment of whether an appropriate contour level has been provided.

### 2.4.2 Raw map

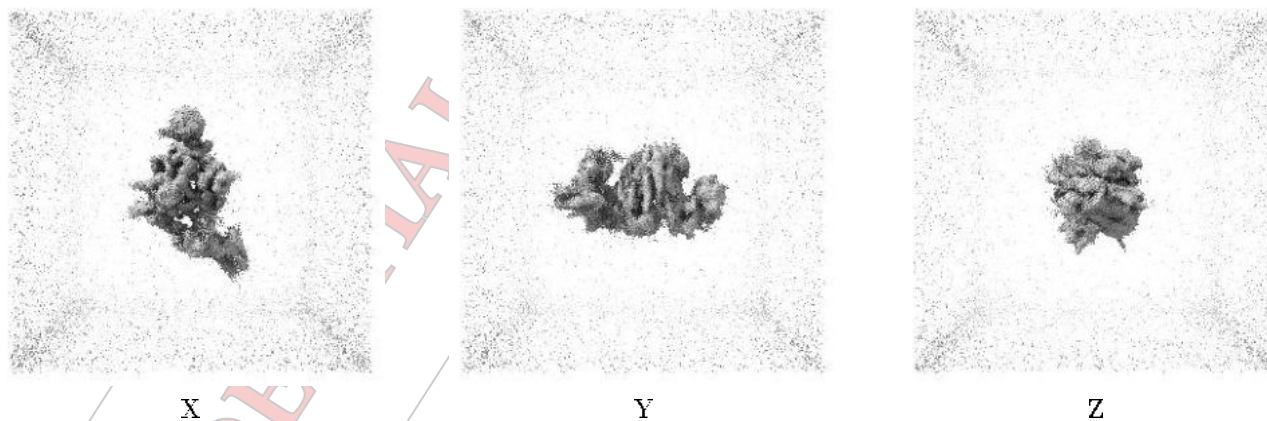

These images show the 3D surface of the raw map. The raw map's contour level was selected so that its surface encloses the same volume as the primary map does at its recommended contour level.



## 2.5 Mask visualisation [i](#)

This section shows the 3D surface view of the primary map at 50% transparency overlaid with the specified mask at 0% transparency

A mask typically either:

- Encompasses the whole structure
- Separates out a domain, a functional unit, a monomer or an area of interest from a larger structure

### 2.5.1 D\_1292113384\_em-mask-volume\_P1.map.V2 [i](#)

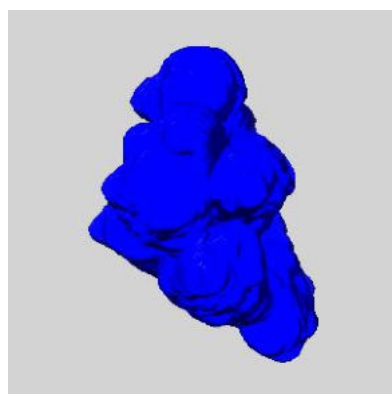

X

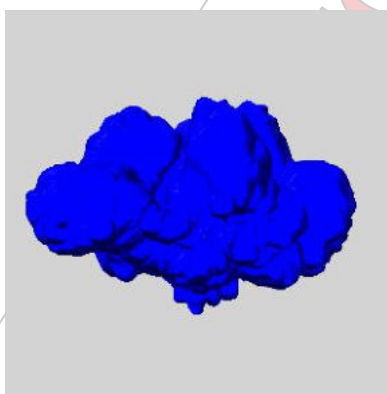

Y

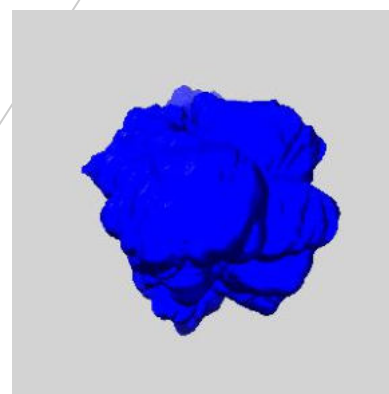

Z

### 3 Map analysis [i](#)

This section contains the results of statistical analysis of the map.

#### 3.1 Map-value distribution [i](#)

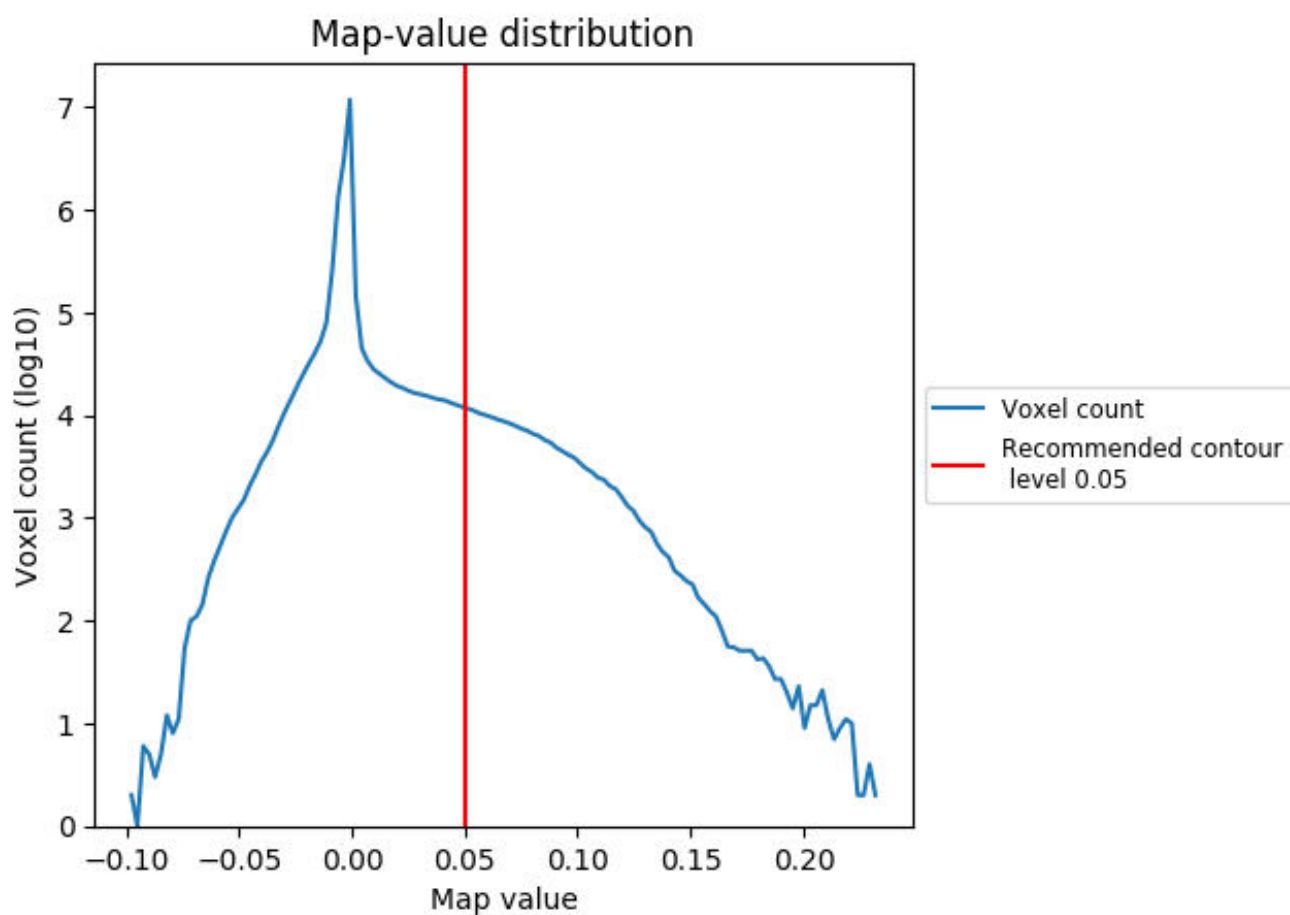

The map-value distribution is plotted in 128 intervals along the x-axis. The y-axis is logarithmic. A spike in this graph at zero usually indicates that the volume has been masked.



### 3.2 Volume estimate [i](#)

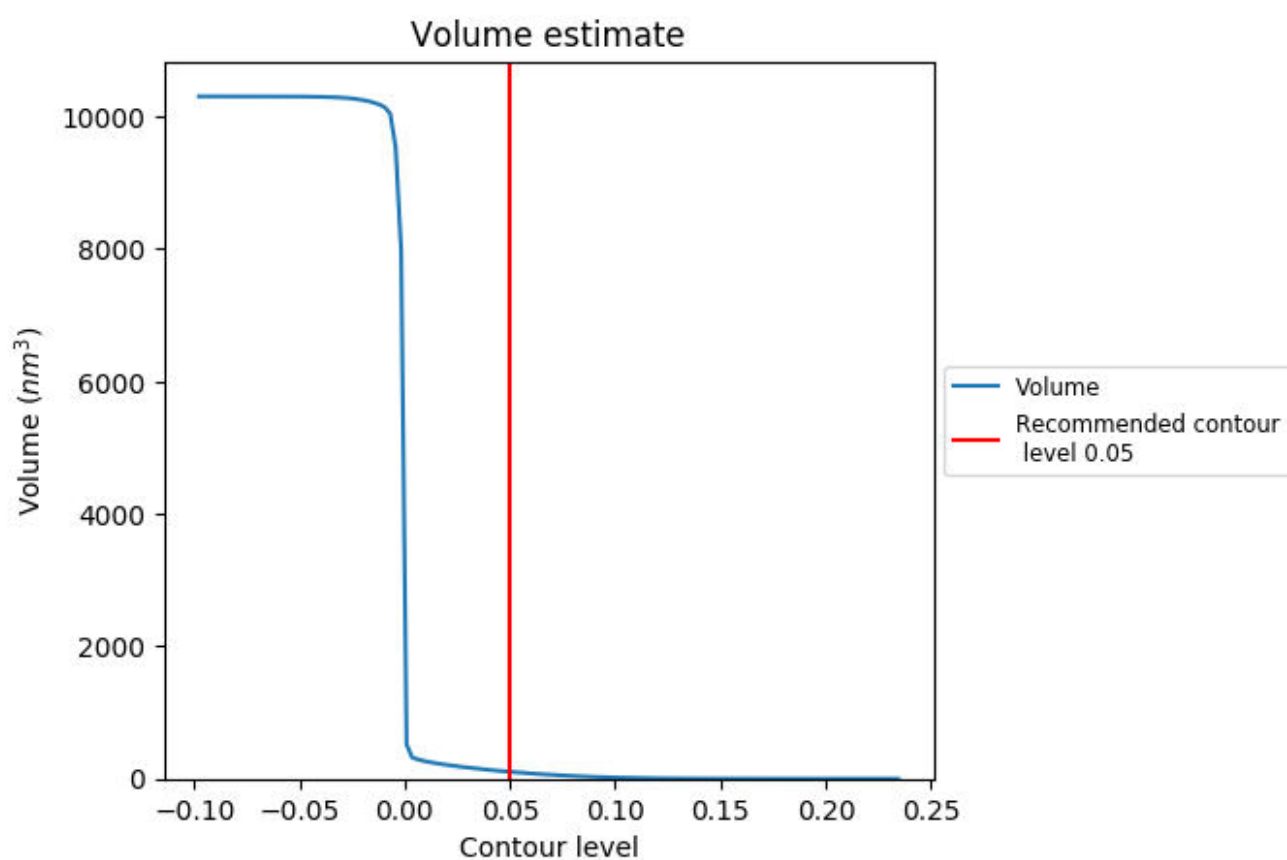

The volume at the recommended contour level is 104 nm<sup>3</sup>; this corresponds to an approximate mass of 94 kDa.

The volume estimate graph shows how the enclosed volume varies with the contour level. The recommended contour level is shown as a vertical line and the intersection between the line and the curve gives the volume of the enclosed surface at the given level.

### 3.3 Rotationally averaged power spectrum

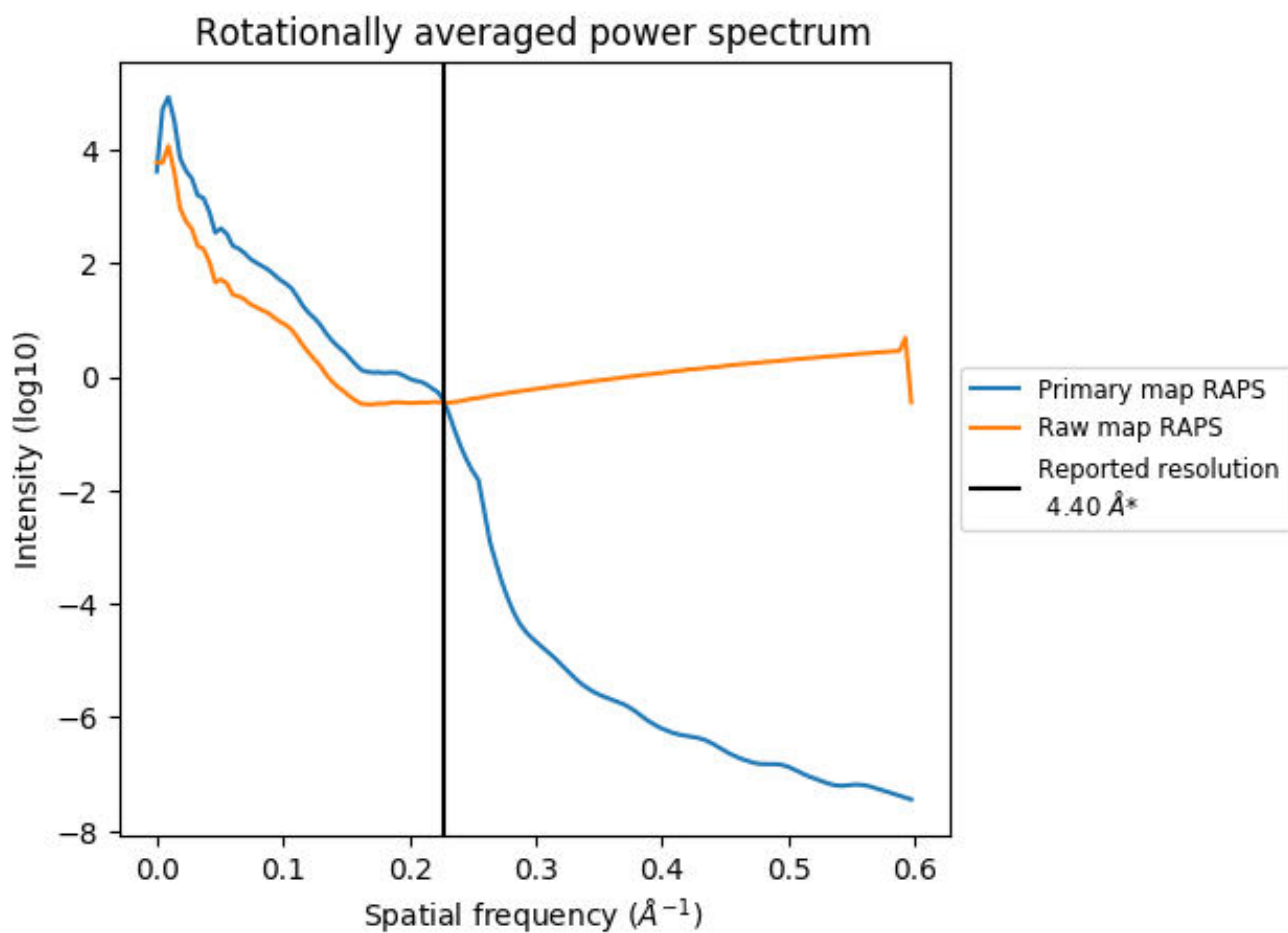

\*Reported resolution corresponds to spatial frequency of 0.227 Å<sup>-1</sup>

CONFIDENTIAL

## 4 Fourier-Shell correlation [i](#)

Fourier-Shell Correlation (FSC) is the most commonly used method to estimate the resolution of single-particle and subtomogram-averaged maps. The shape of the curve depends on the imposed symmetry, mask and whether or not the two 3D reconstructions used were processed from a common reference. The reported resolution is shown as a black line. A curve is displayed for the half-bit criterion in addition to lines showing the 0.143 gold standard cut-off and 0.5 cut-off.

### 4.1 FSC [i](#)

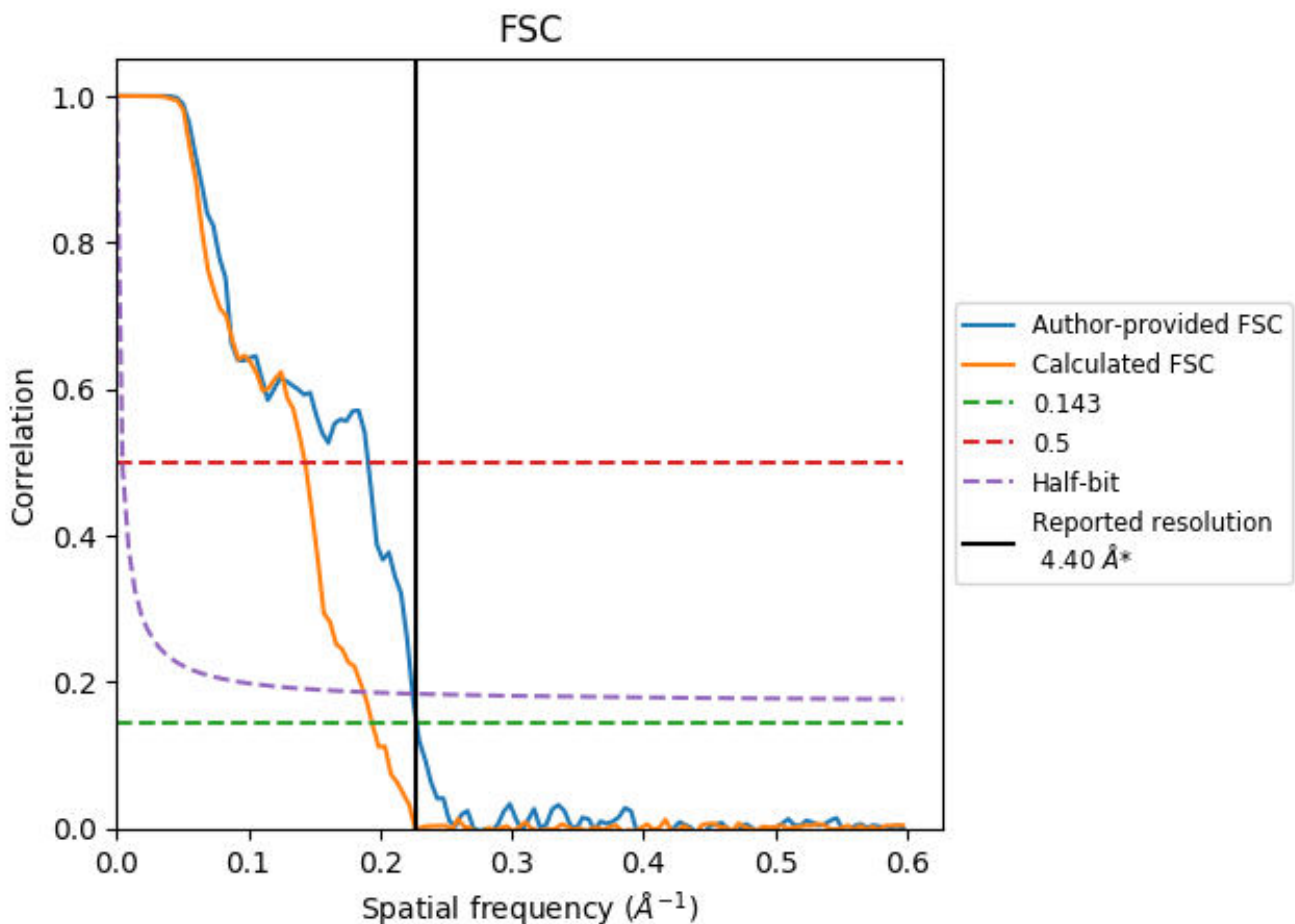

\*Reported resolution corresponds to spatial frequency of 0.227 Å<sup>-1</sup>

## 4.2 Resolution estimates [i](#)

| Resolution estimate (Å)   | Estimation criterion (FSC cut-off) |      |          |
|---------------------------|------------------------------------|------|----------|
|                           | 0.143                              | 0.5  | Half-bit |
| Reported by author        | 4.40                               | -    | -        |
| Author-provided FSC curve | 4.48                               | 5.37 | 4.54     |
| Calculated*               | 5.28                               | 7.23 | 5.46     |

\*Resolution estimate based on FSC curve calculated by comparison of deposited half-maps. The value from deposited half-maps intersecting FSC 0.143 CUT-OFF 5.28 differs from the reported value 4.4 by more than 10 %
